# Supplementary material for: Inducible and reversible phenotypes in a novel mouse model of Friedreich’s Ataxia
Source: eLife. 2017 Dec 19;6:e30054. doi: 10.7554/eLife.30054 (PMC5736353; doi:10.7554/eLife.30054)
Supplement: Figure 1—source data 1. [file elife-30054-fig1-data1.xlsx]

## Sheet: Figure 1e
Organs	Tg -		Tg +
Kidney	50.9182	77.1613	1.0159	0.0137012
Brain	66.6147	90.0401	0.796404	3.8658
Muscle	49.5204	42.5771	6.62269	4.27156
Pancreas	54.3375	63.0459	0.00883943	1.66884
Heart	31.1596	24.1437	1.00525	0.00502719
Lung	23.736	44.6259	5.94802	0.00725284
Liver	84.9913	100	0.0155682	2.11286
Spinal cord	31.8741	30.0559	1.00843	0.00976004

## Sheet: Figure 1g
Weeks	WT Dox				TG Dox				TG NoDox				TG Dox Rescue
W0-FXN	77.0335	75.3116	67.0078	69.9083	88.1214	79.6091	72.7604	86.0261	81.6559	83.305	100	89.3389	0	0	0	0
W3-FXN	81.3604	80.5248	100	76.2222	3.46698	4.15598	12.7208	6.57846	99.4026	97.5775	80.7117	90.2514	0	0	0	0
W8-FXN	52.521	66.6694	97.1539	32.757	0.412433	1.99661	2.71223	0.319567	51.5323	100	60.6113	79.5832	0	0	0	0
W12-FXN	26.8377	23.411	99.1561	100	0.165758	0.0723305	0.322474	0.584672	28.2725	27.7086	39.8903	61.4237	0	0	0	0
W16-FXN	94.5098	85.6247	32.8603	25.8593	0.211297	2.30314	1.79955	0.331033	65.9635	100	34.033	32.3954	2.44048	1.10579	0.0739541	0.757149
W20-FXN	42.3963	50.2366	100	97.0985	3.23079	0.257228	1.30157	1.48678	54.1208	60.5618	90.3694	95.7866	17.8362	20.6606	65.871	62.5476
