# Supplementary material for: Inducible and reversible phenotypes in a novel mouse model of Friedreich’s Ataxia
Source: eLife. 2017 Dec 19;6:e30054. doi: 10.7554/eLife.30054 (PMC5736353; doi:10.7554/eLife.30054)
Supplement: Figure 2—source data 1. [file elife-30054-fig2-data1.xlsx]

## Sheet: Figure 2a
Weeks	Wt -																Wt +																Tg -																Tg +
WK-6	16	21	21	23	23	20	23	20	18	25	25	29	31		27	36	20	19	19	20	20	24	23	23	26	28	23	21	29	29	26	24	19	19	22	21	20	21	21	18	23	25	28	30	27	29	24	27	16
WK-5	18	21	22	24	22	20	22	21	24	26	25	29	33		28	36	21	17	20	20	21	24	23	23	26	31	24	23	30	28	26	25	20	20	22	21	20	22	21	19	24	25	28	30	28	30	25	28	20
WK-4	17.3	20.6	20.9	22.8	21.5	19.9	22.1	20	23.7	25.4	25.4	28.7	32.2	27.5	27.1	35.5	21	18.5	19.5	19.8	21.4	24.5	22.4	23.4	25.8	30.4	23.5	22.8	29.6	28.6	26.5	24.6	19.7	19.6	21.7	21.4	20.8	21.1	21.1	18.4	23.8	25.3	29.3	30.7	27.7	29.5	25.4	28.5	20.4
WK-3	17.8	20.8	20.7	23	20.8	19.8	23	20.5	25	25.8	26.1	19.2	34	27.4	28.3	36	21.5	18.6	20.8	19.8	21.7	24.5	22.8	23.8	26.4	30.6	24.2	23.5	30	29	26.6	25.3	20.3	19.6	22.2	20.6	20.2	21.7	21.2	19	25.1	25.7	30	29.8	28.3	30.3	26.4	27.7	21.1
WK-2	18.6	21	21	23.2	21.4	20.2	23	20.3	24.1	25.8	23.5	29.3	33.4	27.5	27.9	36.3	21.6	18.7	20.5	20.9	22	24.7	22.6	24.4	27	31.1	25.7	23.9	30.2	28.2	26.5	24.8	20.5	20.1	21.9	21.3	20.7	21.9	20.6	18.5	24.63	25.8	29.4	29.9	28.1	30.4	25.6	27.3	21.1
WK -1	19.2	21.5	21.3	23.4	21	20	22.8	20.2	24.4	25.8	25.8	29.2	33.7	26.7	27.9	37	22.2	19.5	20.4	20.8	21.2	25.3	22.7	23.4	27	31.5	23.4	24.5	13.3	28.3	25.8	26.9	20.5	20.1	21.9	21.8	21	21.3	20.5	18.8	24.9	31.2	29.1	30.6	28.5	30	25.2	27.6	21.1
WK 0	19.2	21.8	22.1	23.8	21.5	20.3	23	20.4	24.7	26.2	24.6	29.8	34.2	27.2	28.9	38.9	22.1	19.5	20.5	21	21.9	25.6	22.6	24.4	27.2	32.3	26.2	24.7	30.9	28.7	27.4	24.9	20.9	20.9	22.2	21.3	21.2	21.9	20.5	19.4	25.7	26.3	29.5	30.6	28	29.1	25.8	27.8	21.1
WK 1	19.2	22.2	22.5	27.3	21.6	20.9	25	20.7	25	26.4	25.5	30.8	34.4	27.4	23.5	38.9	20.4	15	21.1	20.8	21.2	24.9	21.9	23.8	26.3	27.9	25.3	25	30.3	28.3	26.6	22.1	21.3	21	23.2	22.3	21.5	22	20.5	19.7	26.6	26.3	29.7	31.5	29.3	29.6	26.3	22.7	15.9
WK 2	18.5	22.3	21.8	24.2	22.3	21.5	24.1	20.6	25.4	26.6	25.6	30.3	34.5	27.7	29.1	39.1	22.6	20.2	20.9	21.8	22.5	24.8	22	24.6	27.3	31	26.3	25.5	31	28.7	27.2	23.8	21.6	20.3	23	21.9	22	21.9	20.8	20	25.8	25.6	29.4	31.6	28.3	29.4	26.8	27.9
WK 3	19	22.5	22	24.3	22.6	21.2	24.9	21.3	24.5	26.6	25.9	30.1	31.8	27.7	27.7	40.8	22.5	21	20.7	22.1	22.3	26.8	23.8	25.9	28	31.5	27.5	26.5	32.4	29.8	27.4	24.7	23.2	20.7	22	22.7	21.8	22.6	22	20.7	24.4	26.4	30	32.1	29.4	30.3	26.5	29.5
WK 4	19.2	22.2	22.5	24.2	21.7	21	25.4	21.4	29.1	27	26.2	30.6	34.4	27.6	26.5	40.7	22.8	21.2	21.6	21.6	22	27	23.5	26	28.7	32.1	28.4	26.6	31.7	29.2	27.9	24.4	21.9	20.6	22.9	21.4	22.6	22.9	21.4	21		27	29.8	30.7	28.8	29.7	26	28
WK 5	19.4	22.6	22.6	24.9	23.5	21.9	24.5	20.2	29.1	26.9	25.6	30.5	34	27.5	25.3	40.8	22.9	21.6	21.6	21.9	23	27.5	23.2	26.2	28.8	32.3	28.4	26.2	32.6	29.1	22.7	24.8	21.1	20.9	22.3	22.5	22.1	23	21.1	20.1		26.2	29.3	30.5	38.8	30.1	26	28.4
WK 6	20.1	22.8	23.3	25.6	22.7	22.2	26	20.8	29.6	28	26	31.2	34.6	27.6	26.3	41.7	23	22.2	22.4	22.1	24.4	27.8	23.8	26.3	29.5	32.7	29.2	26.7	32.9	29.2	28.4	25.2	21.6	21.7	23.2	23.1	22.3	23.5	22.2	20.7		26.5	30.4	32.2	29.5	31.7	26.2	28.8
WK 7	19.9	22.9	23.3	26.3	24.7	22.4	24.6	21.5	30.6	28.1	25.8	31.6	35.8	28.2	27.1	43.2	23	22.1	21.6	22.9	22.5	27.2	24.5	27	28.9	32.8	27.6	26.5	32.2	29.4	28.1	25	22.2	21.6	24.1	22.9	22.2	22.2	21.2	20.3		26.4	30.6	32.1	29	31.3	26.6	29.1
WK 8	20.1	24.3	24	24.9	21.9	22.1	24.6	20.1	26	28	25.7	31.7	35.4	28.3	30.2	44.2	23	20.3	22.1	22.3	23.3	27.4	23.8	25.4	29.8	33.8	28.8	26.5	33.1	29.8	28.7	26.2	22.1	22.1	22.8	22.3	21.8	22.4	22.1	20.4		26.6	31.1	31.4	28.1	30.1	26.7	28.5
WK 9	19.9	22.8	24	25.2	23.3	22.1	25.7	21	27.7	28.1	26.7	32.4	36.4	28.4	31.3	44.2	23.1	22	22.1	23.1	23.6	26.7	24	27.6	29.3	33.4	28	27.5	33.9	31	28.9	26.1	22	22	24	22.8	23.4	22.7	22.5	20.6		26.7	31.1	31.5	29	30.5	26.6	29
WK 10	19.9	23.4	24.3	26	23.4	22.3	26.7	22.1	37.3	28	26.5	32.2	36.3	28	31.4	45	23.9	21.4	22.5	21.9	21.8	27.8	24.2	26.5	29.8	33.6	28.3	26.3	32.7	29.7	28.7	25.6	21.9	21.9	24.4	22.3	22.9	22.5	22.3	20.8		26.5	30.4	30.7	28.3	30.3	26.6	29.1
WK 11	20	23.7	24.6	25.8	22.9	22.3	26.9	22	37.9	28	26.7	32.3	35.9	28.3	31.7	45.5	24.4	21.2	22.3	21.5	21.5	27.3	24	26.8	29.9	33.7	28.5	26.2	32.2	29.5	28.8	25.2	21.6	21.8	24.5	22.4	22.8	22.5	22.5	20.6		26.5	29.8	30.4	28	30	26.5	29.1
WK 12	21.2	23.6	23.3	24.7	22.5	22.9	25.6	21	27.6	28.2	26.7	33	37.7	28.2	31.9	46.1	23.6	23	21.2	22	23	27.8	23.8	27	30.5	33.7	28.8	25.8	31.3	28.4	28.1	25.4	22.1	21.3	23.5	23.4	22.6	22.8	22.1	20.5		27.2	30.7	31.2	28.2	30.7	26.5	29.1
WK 13	21	23.5	24.6	25.6	22.3	23.1	26.7	20.4	27.4	29.1	26.8	34.4	38.2	28.5	31.4	47.3	23	22.2	21.9	22.8	22.6	27.1	23.6	26.9	30.5		28.6	26.3	32.7	29.4	28.7	26	22.2	21.9	23.7	22.1	22.3	22.7	22.4	20.4		27.4	31.3	31.6	28.6	31.1	26.7	28.8
WK 14	21.2	25	24.6	25.8	24.5	24.6	28.3	21.7	28	28.9	26.6	34.4	38.7	28.6	32	46.1	23.3	23.4	22.2	21.8	23.8	27.6	23.8	26.7	30.3	32.3	29.3	27.3	33	29.5	29	26	22.6	22	24.4	22.6	24.3	23.8	21.9	21		27.3	30.7	32	28.4	31.2	27.2	29.7
WK 15	20.9	24	24.1	25.4	24.9	25.2	27.4	22.2	28.7	29.6	26.9	34.5	39.1	28.7	32.7	46.6	23.4	23.9	23.1	22.2	24.6	29	24.6	28.3	30.5	33.9	28.2	27.4	33.5	29.8	29.3	26.3	23.3	21.8	25	23	22.8	23.7	22.1	21.6		26.9	30.9	31.8	28.9	30.9	27.2	29.3
WK 16	20.8	24.6	24.8	26.8	24.5	25.1	27.6	22.2	29.6	30.1	27.4	35.2	40.1	29.5	33.2	28	23.6	24.5	22.8	22.4	24.4	28.8	24.4	26.9	31.5	34.4	30.3	27.2	34.3	30	29.5	26.6	23.1	22.1	24.1	24.4	23.8	24.1	22.8	21.4		27.6	30.9	32.4	29.3	32.2	27.4	29.6
WK 17	21.1	24.3	24.8	28	25.1	26.2	28.3	22.2	30.4	30	27.3	36.3	41	28.7	34.1	48.2	24.3	25.3	23.5	23.4	24.2	29.5	24.6	28	31.7	35.3	30.9	27.5	35.5	30	30.1	27.3	24.2	22.1	25.2	23.5	23.1	24.1	23.2	22.1		27.6	31.2	32.3	29.2	32	27.8	29.6
WK 18	21	24.7	24.9	26.7	25.1	26.2	29.3	23.2	30.4	30.3	27.2	36.1	41.4	29	34.5	48.9	25	23.8	22.2	24.1	24.6	29.2	23.7	27.4	32	35.1	30.6	26.7	25.4	29.6	30.1	26.9	24.7	22.4	25.2	23.5	23	25.2	23.8	22.3		27.6	31.5	32.1	29.1	31.6	28	29.8
WK 19	21	24.9	24.9	27.3	25.3	26.3	29.7	23.5	30.5	30.1	27.3	36.2	41.6	29.1	34.4	50	25.3	23.5	22.1	23.9	24.5	29.3	23.9	27.5	32.2	35	30.7	26.7	35.4	29.5	30.1	26.7	24.8	22.3	25.2	23.5	23	25.1	23.9	22.1		27.6	31.7	32.1	29.1	31.3	28.2	29.9
WK 20	21.2	24.5	25.5	28.4	25.9	27.2	28.8	22.2	30.6	31.8	28	37.1	40.5	29.2	34.5	49.14	23.8	25.6	23	23.2	25.2	30.5	25.4	27.4	32.7	36.1	31	27.8	36.3	30.1	30.5	28.1	23.2	22.8	26.2	23.5	23.5	23.7	22.4	21.8		28.5	31.1	33.1	29.6	31.9	28.5	30.3
WK 21	21.1	25.1	25.2	28.3	24.4	26.2	29.2	22.9	30.4	30.8	27.6	36.7	39.3	29.1	34.1	48.8	24.3	25.7	22.5	23.9	25.3	30	25	27.6	32.6	36.2	30.3	26.9	35.8	29.5	30	27.9	23.4	22.3	24.3	22.9	23.5	24.3	22.9	22.2		28.1	31.2	32.1	28.9	31.8	28.4	30.2
WK 22	21.9	24.3	26	28.3	25	27.1	29.5	22.2	31.1	31.2	27.5	37.1	40.2	29.2	34.8	49.4	24.5	24.3	22.4	22.9	24.7	30.3	24.6	29	32	36.4	30.3	26.7	35.1	29.3	30	27.3	24.2	22.9	24.9	24.1	24.7	27.3	23.5	23.1		27.8	31.3	32.8	29.5	32.1	27.9	30.8
WK 23	22.5	25.2	25.6	27.3	24.9	26.9	28.6	22.2	31.1	31	28.3	37.6	40	29.3	35.3	48.8	24.7	24.6	23.6	22.8	23.7	31	25	28	31	35.3	28.7	27.3	33.7	27.4	29.6	26.5	23.9	22.9	25.1	23	24	24.1	24	23.5		27.6	31.4	32.4	30	32.7	28.9	30.6
WK 24	21.8	24.4	25.6	27.4	26.7	26	30.1	23.7	30.7	31.2	28	37.4	39.8	28.2	34.8	49	25.2	25	23.1	23	25.8	30.1	24.6	27.9	31.6	31.2	30.3	27	35.4	29.6	30.3	27.3	23.9	23.4	25.3	23	24.1	24.1	22.9	21.9		27.6	31	32.3	30.3	32.5	29	30.4
WK 25	23.3	28.8	25.8	27.6	26	26.5	31.3	24	30.8	31.6	28.5	37	39.9	28.3	34.8	49	25.2	25.1	23.3	22.9	26	30.1	24.5	28.1	32.5	31.9	30.9	27.1	36	29.6	30.5	27.5	24.1	23.4	26	23.2	23.9	24.5	23.4	22.3		27.6	31	32.9	30.3	32.7	28.5	30.9
WK 26	22.5	25	26.1	27.6	25.5	26.8	32.2	24.6	30.8	32.1	28.9	36.8	40.3	28.6	35	49.3	25.2	25.3	23.7	22.8	26.7	29.5	24.5	29.6	33.1	32.4	31.4	27.3	37.9	29.7	30.8	27.5	24.4	23.6	26.8	23.8	23.8	24.7	23.9	22.9		27.9	31.3	33	30.2	32.7	27.9	31.2
WK 27	22.8	25.2	26.2	28.5	26.1	26.6	31.8	24	28.2	31.5	27.8	36.5	40.1	28.8	35.1	51.1	25.4	25.3	24	23.2	25	30	24.1	29.9	33.6	32.2	31.87	26.9	37.7	29.4	30.7	27.8	23.9	22.9	25	23.3	24	24.6	23.1	22.2		27.1	31.8	32.3	29.1	31.8	28.4	30.1
WK 28	23.1	25.4	26.1	28.9	26.3	27	29.9	22.5	28.4	31.9	28.9	37.5	40.5	28.6	35.2	51.1	25.2	25.6	23	23.5	26.1	30.7	24.2	28.1	34.1	31.5	32.8	27.2	37.3	29.9	30.6	28.1	24.3	23.2	25.4	24.5	23.9	26	23.5	22.7		27.4	30.9	32.4	30.1	31.8	28	30.5
WK 29	23.4	25.2	26.1	29.1	26.3	27.3	29.5	22.9	28.4	31.7	28.7	37.2	40.3	28.7	35.3	51.3	25.2	25.7	22.9	23.3	25.8	30.8	24.6	28	34.5	31.8	33	27.3	37.5	29.77	30.7	28.3	24.2	23	25.6	24.1	23.8	25.9	23.5	22.8		24.6	31.1	32.3	30.3	31.7	28.2	30.3
WK 30	23.2	25.4	26.8	29.1	25.9	27.1	29.9	23.1	30.2		28.7	37.2	41.5	28.6	35.8	51.5	25.2	26.2	23.3	23.4	25.9	31.2	24.7	29.8	33.8	31.4	32.5	25.4	27.8	29.8	30.5	28.5	24.1	23.3	25.9	24.3	24.1	25.9	23.4	22.8		27.5	31.5	32.8	30.5	31.9	28	30.8
WK 31	23	25.6	27.2	29.2	25.6	27.3	31.4	23.2	31		28.8	37.2	42	28.5	36.2	51.6	25.4	26.3	23.6	23.4	26	31.3	24.7	30.5	32.7	31.4	30.7	27.7	38.1	29.9	30.3	28.8	24	23.7	26.2	24.5	24.6	25.9	23.3	22.6		28.3	31.7	33.5	30.7	32.3	27.6	31.3
WK 32	23.2	25.7	26.6	28.8	26.2	27.6	31	23.4	30.7	32.4	29	37.3	42.6	28.5	36.5	52.1	25.3	26.3	24	23	25.1	30.4	24.6	30.9	33.4	31.1	30.5	27.4	38.5	29	29.9	28.1	24.2	23.7	25.9	24.2	24.4	26	23.3	22.5		28	31.2	33.2	30.6	32.6	27.6	31.5
WK 33	23.8	25.7	26.8	28.6	26.5	27.1	31.8	23.5	31.1	32.2	29.3	37.2	42.9	28.6	37.1	52.3	25.6	26.1	24.5	23.2	25.2	30.7	24.5	31.2	33.8	31.2	30.9	27.3	38.4	29.8	29.5	28.6	24.6	23.6	25.4	24.4	24.7	26.7	23.5	22.9		28.2	31.5	33.6	30.3	32.7	27.3	31.9
WK 34	23.7	25.2	26.1	28.5	26.9	27.9	31.5	23.3	31.3	32.8	29.4	37.7	42.7	28.7	36.8	53.1	25.4	26.5	24.7	23.3	25.9	30.5	24.5	31.3	33.2	31	31.2	27.4	38	30	30.2	28.3	24.4	23.3	26.1	24.1	24.9	26.9	23.4	30.1		28.1	31.7	33.7	31	32.9	27.5	32
WK 36	23.9	24.9	26.3	29.1	27	26.9	30.6	23.3	29.6	32.8	28.7	37.6	40.9	26.8	35.4	51.5	26.2	25.7	23.3	23.6	24.5	29.4	24.5	31.2	32	30.9	29.4	26.8	35.3	28.6	29.3	28.7	23.9	24.1	26.7	25	23.4	24	24.8	23		27.3	30.7	32	30.4	32.8	26.9	30.8
[truncated: 58 more columns]

## Sheet: Figure 2b
Week	Wt -	Wt +	Tg -	Tg +	Tg +/- Rescue
0	100	100	100	100	100
1	100	100	100	100	97
2	100	100	100	93	94
3	100	100	100	79	94
4	100	100	94	79	94
5	100	100	94	76	94
6	100	100	94	76	90
7	100	100	94	76	90
8	100	100	94	76	90
9	100	100	94	76	87
10	100	100	94	69	87
11	100	100	94	69	87
12	100	100	94	66	77
13	100	100	94	66	71
14	100	100	94	66	71
15	100	100	94	62	71
16	100	100	94	55	68
17	100	100	94	52	68
18	100	100	94	52	68
19	100	100	94	52	68
20	100	100	94	48	68
21	100	100	94	45	68
22	100	100	94	41	68
23	100	100	94	41	68
24	100	100	94	41	68
25	100	100	94	7	68
26	100	100	94	7	68
27	100	100	94	3	68
28	100	100	94	3	68
29	100	100	94	3	68
30	100	100	94	0	68
31	100	100	94	0	68
32	100	100	94	0	68
33	100	100	94	0	68
34	100	100	94	0	68
36	100	100	94	0	68

## Sheet: Figure 2c
Genotype	WK 0	WK 12	WK 24
Wt -	24.4636	84.2446	46.9348
	26.8121	24.2599	38.6428
	24.3762	21.9287	28.8619
	36.2949	24.7286	70.8122
	26.3115	75.2021	36.2574
	25.7357	24.5607	20.2497
	33.645	14.2101	82.5228
	69.2413	42.0763	26.4034
	31.3626	28.1701	20.1312
	19.3118	12.4084	24.589
	17.9651	27.5539	32.9448
	12.6257	19.7501	14.7274
	19.5043	19.5186	63.1894
	21.4197	35.2916	25.8547
	16.6043	29.3775	12.0596
	29.167	14.9416
Tg -	30.7204	14.4464	31.5332
	24.604	13.6768	24.0868
	19.7352	24.3213	44.5299
	32.4462	42.665	72.189
	24.1	48.6283	50.3692
	32.7196	56.0327
	26.4844	35.2197
	25.8018	31.8238	8.96004
	17.6493	13.9345	26.5037
	18.9797	15.305	35.5952
	29.4201	13.4497	39.6877
	25.7746	34.9453	52.7071
	10.3321	35.5667	48.2189
	11.9051	10.4984	23.3159
	24.5218	20.6308	41.2857
	13.8776
Wt +	25.2606	24.0345	22.5276
	27.1619	20.2577	29.7006
	28.4974	35.888	25.4826
	25.5852	23.7935	58.87
	28.7671	41.3213	53.2973
	26.6261	20.6381	37.2322
	33.1602	42.2647	17.2464
	22.1668	25.5636	14.1031
	21.2215	9.17943	11.2671
	25.0405	15.0244	22.2544
	51.3135	19.0628	27.5648
	14.2968	34.6998	49.0599
	27.5455	28.234	80.9846
	20.9984	100	42.6469
	16.5305	32.5088	33.354
	19.8414	56.4008	76.8312
Tg +	25.461	5.05702	8.23349
	27.4038	4.25823	19.5749
	11.4846	4.65432	11.8181
	18.1181	1.8119	2.88256
	24.0729	24.3069	14.777
	28.5138	1.29028	15.1455
	26.2981	1.83271	4.20567
	52.6204	8.39954	2.59026
	21.7126	2.24115	49.3324
	31.0419	0.95508	18.2158
	21.3876	4.57467	3.1108
	18.9601	0.137007	5.10679
	38.2377	3.29205	19.1846
	16.6214	12.5373	0.361105
	30.4451	1.06793
	26.1527	9.08223
	12.2688	0.413079
	13.7927	1.73019
	8.79678	8.27506
	8.52885
	15.9072
	14.7609
	21.9132
	21.354
	21.5933
	37.4997
	15.0555
	34.0729
	28.7055
	5.14804
Tg +/- Rescue	7.52587	1.31793	11.8014
	14.654	2.94183	8.23807
	14.7761	6.12638	61.3434
	10.0755	17.3177	35.7673
	29.1254	8.19436	24.3772
	39.0006	7.46077	17.2138
	100	20.9396	84.0332
	22.8381	8.97216	34.5278
	87.3525	7.95718	35.1642
	39.4257	4.50354	39.5357
	25.5075	20.92	17.6327
	20.7053	24.1261	88.3236
	14.8642	92.664	100
	29.326	2.00076	15.9544
	29.6299	4.91303	39.9586
	21.7186	13.8041	29.4415
	18.3987	1.16317	21.4999
	16.9136	7.59653	22.7313
	18.5179	2.83008	23.1315
	11.6668	3.00914	11.3164
	15.5023	1.86677	44.896
	20.0192	9.22636
	19.5424
	14.0705
	45.526
	33.9723
	22.8485
	18.7947
	17.9422
	11.3301

## Sheet: Figure 2d
Genotype	WK 0	WK 12	WK 24
WT_ND	2.967	2.91	2.342
	2.72	2.71	3.163
	2.028	3.13	2.835
	2.927	3.15	3.137
	2.208	2.93	2.905
	2.667	2.57	3.06
	3.49	2.99	1.496
	2.847	2.68	2.841
	3.154	3.5	2.767
	3.037	3.11	2.414
	2.802	2.96	3.119
	3.32	3.27	2.773
	2.48	3.35	3.049
	2.987	3.04	3.027
WT_DOX	2.809	3.19	3.262
	2.786	2.93	3.322
	2.482	3.03	3.309
	2.92	2.85	2.599
	3.18	3.17	2.374
	2.42	2.74	3.022
	2.78	2.85	2.52
	2.707	3.02	2.923
	2.627	3.27	3.041
	2.72	2.83	2.968
	2.45	2.92	2.755
	2.553	2.56	2.99
	3.325	3.32	3.6
	3.442	3.49	3.047
TG_ND	2.29	2.66	1.833
	2.669	2.57	2.807
	2.367	2.81	2.912
	2.78	2.87	2.726
	2.547	2.76	2.773
	2.547	2.25	2.401
	2.735	3.11	2.361
	2.397	2.52	2.428
	2.807	3.15	3.706
	2.767	2.73	2.84
	2.704	3.39	3.262
	2.867	3.44	2.833
	2.664	2.95	3.115
	2.68	3.14	2.788
TG_DOX	2.425	2.74	2.477
	2.52	2.75	2.473
	2.661	2.36	2.454
	2.12	2.2	2.505
	2.4	2.39	2.607
	2.462	2.51	2.021
	2.593	2.24	2.614
	2.823	2.5	2.624
	2.687	2.76	2.235
	2.761	2.61	2.963
		1.8
		2.77
		2.61
		1.75
		2.13
		2.86
TG_DOX_R	2.527	2.39	2.329
	2.256	2.02	2.845
	2.409	2.24	2.708
	2.583	2.34	2.555
	2.847	2.76	2.727
	2.365	2.87	2.278
	2.767	2.44	2.048
	2.625	2.2	2.685
	1.941	2.9	2.755
	2.389	2.34	2.712
	3.06	2.97	3.519
	3.171	3.2	3.182
	2.838	2.34	2.396
	2.977	2.95	2.899

## Sheet: Figure 2f
Genotype	WK 0	WK 12	WK 24
WT_ND	0.038	0.06	0.042
	0.036	0.022	0.042
	0.041	0.046	0.037
	0.025	0.036	0.039
	0.036	0.062	0.045
	0.028	0.043	0.032
	0.054	0.039	0.029
	0.027	0.043	0.028
	0.021	0.034	0.041
	0.038	0.044	0.035
	0.027	0.039	0.029
	0.024	0.026	0.021
	0.019	0.031	0.023
	0.024	0.037	0.031
	0.023	0.044	0.031
	0.022	0.023	0.023
TG_ND	0.034	0.044	0.038
	0.038	0.043	0.042
	0.014	0.028	0.049
	0.029	0.03	0.041
	0.043	0.052	0.034
	0.023	0.048	0.025
	0.044	0.071	0.049
	0.027	0.045	0.042
	0.018	0.03	0.034
	0.021	0.041	0.034
	0.017	0.02	0.032
	0.018	0.038	0.03
	0.014	0.03	0.032
	0.03	0.041	0.038
	0.023	0.029	0.041
WT_DOX	0.039	0.043	0.032
	0.028	0.036	0.03
	0.035	0.044	0.046
	0.029	0.058	0.025
	0.031	0.046	0.043
	0.021	0.037	0.033
	0.026	0.038	0.041
	0.027	0.032	0.039
	0.026	0.031	0.028
	0.035	0.033	0.029
	0.029	0.047	0.028
	0.024	0.032	0.03
	0.025	0.046	0.028
	0.031	0.031	0.034
	0.033	0.053	0.034
	0.029	0.059	0.046
TG_DOX	0.023
	0.024	0.031
	0.026	0.014
	0.024	0.032
	0.034	0.025
	0.023	0.026
	0.019	0.027
	0.026	0.027
	0.046	0.041
	0.023	0.043
	0.028
	0.03
	0.027	0.03
	0.018	0.019
	0.026	0.02
	0.039	0.025	0.022
	0.025	0.022
	0.034	0.047
	0.021	0.024
	0.022
	0.01
	0.023	0.041
	0.026	0.043
	0.023	0.027	0.018
	0.025	0.029
	0.038
	0.025
	0.03
	0.031
	0.028	0.047
TG_DOX_R	0.013	0.018	0.04
	0.031	0.019	0.027
	0.028	0.023	0.031
	0.012	0.039	0.03
	0.024
	0.025
	0.034	0.025	0.024
	0.034	0.038	0.032
	0.025	0.037	0.036
	0.033	0.03	0.028
	0.026	0.046	0.046
	0.03	0.042	0.033
	0.035	0.035	0.047
	0.029	0.031	0.027
	0.039	0.059	0.04
	0.029	0.031	0.038
	0.013	0.021	0.036
	0.035	0.03	0.026
	0.037	0.035	0.029
	0.026	0.037	0.032
	0.021	0.026	0.034
	0.018	0.033
	0.018
	0.021	0.038
	0.029	0.022
	0.017
	0.019
	0.032
	0.029	0.022
	0.021	0.011	0.028

## Sheet: Figure 2g
Weeks	Wt -																Wt +																Tg -																Tg +
WK-1	25.33	26.9	23.17	22.07	22.47	27.1	24.03	24.07	12.57	16.7	19.03	25.83	19.73	19.97	22.73	14	19.83	21.7	21.4	17.37	25.7	24.8	23.73	21.53	21.27	18.67	20.03	23.83	18.13	21.2	20.97	16.27	19.93	14.43	28.77	27.07	20.03	20.77	28.4	29.43	16.83	15.87	26.2	17.03	21.83	24.37	19.4	20.33	18.93
WK0	25.4	21.53	18.13	21.3	23.97	29.2	27.93	30.97	17.6	11.97	10.73	19.27	21.1	32.37	21.77	18.53	18.17	19	29.5	18.5	29.63	22.03	34.63	26.83	27.17	19.13	18.87	14.5	24.77	26.07	21	23.13	20.33	14.1	14.6	26.53	31.03	21.77	20.9	23.73	20.17	13.23	19.33	23.07	27.9	25.97	13.27	19.63	14.17
WK1	27.83	28.87	26.73	19.77	24.2	32.47	28.2	23.33	18.6	11.3	17.27	17.83	26.1	39.67	21.67	18.57	31.1	31.87	29.57	18.53	28.4	29.67	40.17	22.83	26	18.9	19.9	18.53	29.03	31.83	21.27	20.43	20.03	11.87	22.43	29.43	29.1	24.07	16.17	31.5	15.2	13.9	24.5	14.63	19.7	19.53	16.43	21.23	17.9
WK2	23.97	29.8	28.13	18.23	24.03	24	26.37	24.97	38.93	13.8	19.47	16.1	24.2	33.27	30.17	18.33	31.8	29.83	18.17	23.2	25.43	24.53	33.63	25.03	23.6	21.03	20.07	17.93	23.57	22.2	26.8	25.73	22.13	14.17	23.1	23.83	29.63	16.53	18	35.8	24.07	13.67	21.27	13.23	22.03	21.07	20.6	18.23
WK3	18.53	22.77	21.53	18.23	28.77	14.83	25.03	29.03	23.23	16.07	20.03	22.5	26.03	39.53	20.83	22.53	28.4	28.67	22.7	19.83	29.6	21.67	32.87	25.33	19.17	17.93	18.43	19.13	27	32.7	18.53	24.03	19.99	11.5	19.53	20.97	26.93	16.17	22.5	32.1	20.4	9.8	19.73	14.33	19.47	14.63	16.73	22.4
WK4	27.67	27.9	23.1	19.13	25.2	22.17	21.37	24.57	22.37	15.57	19.43	23.03	22.97	35.77	21.4	22.03	30.2	29.83	27.77	23.83	26.3	14.13	38.57	23.23	17.9	15.53	23.27	16.83	21.57	31.83	18.9	21.13	15.73	12.63	20.57	22.17	24.37	16.4	22.83	32.7		12.3	20.3	14.3	21.5	19.07	20.63	17.93
WK5	23.71	25.86	24.27	19.46	24.53	26.01	25.55	25.95	20.11	14.64	17.85	21.87	22.89	32.3	23.4	20.61	24.8	26.5	25.73	19.67	27.07	22.3	29.63	24.17	22.33	18.57	20.37	17.57	23.87	27	22.07	22.07	21.37	13.1	21.03	23.77	25.93	18.83	20.73	29.3		13.47	22.87	17.2	23.23	22.2	17.17	19.77
WK6	21.63	22.57	25.63	20.5	17.07	18.47	20.83	24.9	23.9	15.9	16.73	23.9	20.97	31.07	18.27	19.2	26.03	24.7	23	17.93	29.7	16.63	33.33	20.43	11.2	11.33	17.97	15.23	23.8	29.4	14.1	16.83	17.33	14.93	26.5	22.2	25.67	12.63	19.03	39.63		12.1	19.5	15.3	20.27	17.47	15	19.67
WK7	24.1	27.37	24.87	18.87	25.57	23.37	25.27	25.5	25.87	14.17	19.07	19.9	24.83	37.07	23.47	20.4	30.4	30.03	24.53	21.7	27.47	22.5	36.33	24.13	21.77	18.53	20.43	18.13	25.33	29.63	21.37	22.83	19.47	12.53	21.43	24.13	27.53	18.3	20.07	33.03		12.43	21.47	14.13	20.67	18.6	18.6	19.93
WK8	11.1	27.43	28.33	20.5	23.17	17.6	19.13	22.3	16.1	17.47	22.57	31.33	17.1	25.1	24.03	11.7	29.07	22.27	28.6	14.3	26.9	18.2	29.9	18.67	17.73	12.87	24.37	21.13	25.07	31.1	19.07	19.13	17.3	16.8	19.9	23.4	16.17	11.6	10.53	11.6		12.17	31.67	14.87	20.7	19.1	13.53	18.9
WK9	16.4	25	27.03	20.5	20.13	18.03	20.03	23.63	20	16.7	19.67	27.67	19.03	28.13	21.17	15.47	27.57	23.5	25.8	16.13	28.33	17.43	31.67	19.6	14.47	12.1	21.17	18.2	24.47	30.3	16.6	18	17.33	15.9	23.23	22.83	20.93	12.13	14.8	25.63		12.17	25.6	15.1	20.5	18.33	14.3	19.3
W10	19.77	31.1	31.5	22.67	20.77	20.93	17.97	21.23	12.53	16.83	22.17	27.83	16.8	34	25.13	16.27	30.4	16.37	26.47	20.47	23.7	22.33	22.43	21.1	18.07	13.57	18.2	16.2	26.4	27.33	20.8	28.77	19.1	15.83	22.7	24.9	19.37	19.27	28.67	41.9		17.23	26.6	17.2	17.93	21	15.33	22.1
W12	16.93	25.37	21.27	17.93	14.57	20.4	20.97	19.4	16.67	16.27	18.9	23.43	15.83	42.9	22.37	12.57	28.8	15.73	26.07	18.7	17.8	20.2	22.97	16.67	10.43	8.73	15.83	15.7	27.13	26.83	10.57	26.27	18.43	13.4	20.13	16.87	17.37	13.17	22.07	30.9		11.8	23.37	11.53	11.83	18.5	16.37	13.47
W13	19.9	23.63	25.63	17.93	16.17	16.47	17.43	14.43	20.7	14.4	23.1	25.2	16.43	31.9	22.63	15.83	27.3	18.03	28.73	20.67	20.57	17.7	10.43	27.4	22.2	8.7	22.8	16.5	25.17	28.83	11.3	15.33	18.4	10.73	23.63	17.63	17.9	11.47	24.63	29.2		10.67	19.53	10.43	11.3	19.03	14.57	10.03
W14	18.47	24.6	23.5	17.97	15.5	18.47	19.23	16.97	18.73	15.37	21.03	24.33	16.1	33.3	22.43	14.23	28.07	17	27.43	19.7	19.2	18.97	16.73	22.07	16.1	8.97	19.3	16.17	25.5	27.87	10.97	20.8	18.63	12.07	21.93	17.27	17.67	12.33	23.23	30.23		11.27	21.47	11.03	11.57	18.8	15.5	11.8
W15	20.37	21.97	25.37	15.53	11.47	15.67	11.8	19.07	18	13.47	16.2	18.83	14.97	39.43	19.8	17.13	28.1	14.97	25.1	20.67	18.37	19.37	24.53	14.53	22.13	7.7	22.3	17.37	25.57	25.67	13.93	14.47	26.8	12.48	22.67	20.53	13.83	12.3	24.8	29		12.03	20	20.93	10.63	14.6	13.63	10.73
W16	22.17	21.2	27.2	21.87	9.33	25.6	7.63	9.87	16.77	11.67	24.33	23.3	18.43	42.8	20.9	11.6	34.17	18.87	16.2	22.57	21.77	26.73	17.4	17.17	14.53	7.83	17.47	16.03	23.1	28.8	17.87	14.8	22.4	13.4	20.77	19.83	17.4	10.93	25.17	31.17		13.7	32.37	15.93	19.4	22	16.8	13.6
W17	20.63	21.63	26.3	18.7	9.43	19.63	9.73	10.43	17.4	10.57	20.3	20.97	16.7	41.13	18.73	10.67	31.17	16.93	16.83	21.63	20.43	21.47	21	15.53	14.87	7.8	18.63	16.7	21.2	25.87	15.93	14.67	23.97	12.97	21.8	20.2	16.3	11.63	25	30.1		12.9	27.53	18.47	15.07	18.3	15.23	12.2
W18	15.37	19.77	17.2	18.37	15.53	17.23	10.17	14.8	13.73	15.87	20.6	23.67	12.47	44.53	22.6	8.8	24.3	21.73	25.87	27.47	18.23	16.17	18.07	13.13	13.7	5.27	15.97	15.6	18.57	24.9	10.27	8.7	20.27	6.63	22.87	18.97	12.7	10.57	19.27	29.27		14.5	24.6	9.5	12.6	16.83	14.33	13.03
W19	13.57	23.6	23.5	10.63	18.7	15.3	9.4	23.7	12.3	16.67	18.77	22.6	13.3	41.93	17.07	8	23.27	8.43	28.07	21.13	19.47	19.13	20.87	12.43	8.3	5.23	15.07	16.73	20.7	22.07	13.5	18.2	22.53	13.87	20.83	23.3	14.67	11.47	19.23	39.87		11.97	20.27	8.4	19	15.43	13.33	16.2
W20	17.9	19.03	18.9	11.33	17.45	18.17	12.17	17.6	12.5	13.07	18.73	23.83	11.03	33.83	13.87	8.23	24.13	13.17	29.13	19.83	16.87	21.5	23.37	10.43	15.67	8.8	13.2	20.6	19.47	17.2	10.73	19.63	15	6.13	21.73	22.77	19.43	11	19.47	36.53		8.4	19.9	9.2	14.27	18.2	12.53	12.73
W21	20.37	24	19.63	17.27	13.3	22.67	12.47	19.57	12.37	11.23	16.03	21.97	10.4	20.9	16.73	11.13	24.17	15.1	30.37	22.13	19.3	21.53	28.47	14.63	20.67	11.13	14.43	21.27	18.63	26.83	11.13	14.3	22.57	4.37	20.27	17.67	19	11.87	32.33	38.73		8.9	12.83	17.6	21.23	19.57	11.7	15.33
W22	11.87	22.7	14.8	18.23	15.73	19.43	11.67	18.13	11.1	11.73	17.1	21.53	9.87	25.33	16.07	12.67	24.2	12.13	29.27	18.43	16.7	22.8	25.47	12.27	21.1	10.8	18.03	21.2	17.5	22.17	7.07	10.97	20.67	8.2	20.97	19.97	20.2	10.73	26.33	14.9		6.13	17.9	13.23	17.93	18.83	10.97	18.6
W23	13.2	15.53	19.2	18.17	12.47	15.73	10.3	15.57	12.8	9.8	14.53	18.87	12.5	31.37	11.9	14.23	20.83	14.37	26.43	20.13	16.57	9.3	15.97	10.7	21.67	10.6	13.33	14.5	14.2	18.97	2.27	11.03	25.83	8.47	15.53	13	16.9	8.47	28.13	25.13		9.23	18.2	11.03	10.03	12.67	11.97	13.8
W24	16.23	26.57	23.97	26.83	17.4	15.47	6	14.37	9.87	10.93	17.77	20	13.6	29.57	13.73	13.2	26.67	9.1	23.67	16.6	19.17	13.9	17.43	10.07	24.57	10.77	18.63	18.43	13.13	19.6	7.07	6.1	23.73	9.87	18.37	12.7	17.17	10.6	30.6	18.17		10.23	20.73	12.4	11.97	8.67	16.07	14.5
W25	17.13	28.83	22.3	23.7	21.43	17.57	10.9	23.17	10.77	12.7	18.07	26.27	13.03	33.23	14.03	12.93	29.23	13.6	25.9	19.9	20.2	17.43	24.43	13.87	15.1	12.13	17.77	23.5	19.43	25.9	6.33	10.2	21.03	7.5	23.33	15.77	18.33	13.77	29.23	23.93		11.07	21.9	16.97	14.83	18.67	16.07	17
W27	18.03	27.83	19.97	21.23	25.6	18.73	18.93	20.2	18.37	8.4	24.07	24.53	10.8	28.4	18.73	10.6	32.5	22.33	21.23	19.7	18.83	17.07	25	10.57	15.73		22.73	18.67	14.47	34.13	4.37	12.23	16.07	10.3	17.67	14.6	20.13	10.27	33.3	38.2		13.57	21.83	14.07	18.53	20.4	11.93	17.43
W28	21.37	27.87	24.53	25.93	20.5	20.37	14.93	27.13	14.07	6.6	21.8	19.43	10.53	35.23	22.4	10.43	21.6	23.03	26.5	22.4	15.77	17.8	23.23	14.53	17.53		24.93	22.1	22.27	32.2	5.73	16.87	15.03	5.07	18.23	15.47	22.47	6	28.5	35.6		8.87	27.57	15.17	22.23	20.1	16.7	13.6
W30	17.8	28.53	23.9	20.33	20.67	17.9	10.13	18.17	7.57	14.1	17.17	29.1	12.57	23.03	26.9	12.7	27	20.43	31.63	16.4	21.3	17.83	31.3	15	23.1		23.2	17.77	23.27	32.4	7.57	19	18.53	5.67	14.33	18.43	21.7	12.13	29.5	35.73		16	31.17	15.5	23.97	21.63	12.17	20.67
W31	19.1	25.17	24.53	19.93	23.07	18.3	12.6	21.3	9.57	10.47	18.3	26.6	11.87	25.9	29.6	12.2	28.37	19.57	29.03	17.73	21.1	15.2	29.33	12.4	23.2		21.67	19.17	20.6	33.4	9.67	17.9	19.43	5.47	13.77	16.73	22.3	12.17	29.13	33.5		14.93	30.27	15.63	20.6	20.97	13.27	20.53
W32	12.13	23.7	23.13	18.47	19.73	14.93	12.27	21.93	9.82	10.8	18.33	21.93	8.77	25.33	23.5	10.83	28.23	22.6	30.7	19.33	22.03	20.47	25.57	12.07	24		20.6	16.8	20.17	29.53	8.43	13.63	20.23	7.83	12.83	16.03	19.27	11.43	28.6	31.83		16.73	25.9	14.3	17.7	20.63	10.3	19.07
W33	5.23	22.27	21.83	16.73	16.47	11.6	11.9	22.6	10.13	11.17	18.43	17.27	5.43	24.9	17.37	9.5	28.17	25.63	32.4	20.93	23	25.8	21.83	11.83	24.83		19.63	14.47	19.73	25.7	7.23	9.37	21.13	10.2	11.87	15.33	16.23	10.8	28.1	30.23		18.57	21.57	12.97	14.83	20.47	7.33	17.63
W34	8.67	22.97	22.43	17.6	18.07	13.23	12.07	22.27	9.93	11.13	18.37	19.6	7.1	25.1	20.4	10.17	28.2	24.1	31.53	20.13	22.5	23.13	23.67	11.93	24.37		20.1	15.6	19.93	27.6	7.8	11.47	20.67	8.97	12.3	15.67	17.7	11.07	28.33	31		17.67	23.7	13.6	16.23	20.53	8.77	18.33
W36	7.6	23.87	17.5	20.23	18.5	14.1	15.23	20.13	12.57	10.13	19.3	13.47	7.57	28.13	18.13	8.03	28.33	22.2	32.7	17.57	21.13	20.6	19.37	10.43	22.17		16.83	14.9	23.03	28.07	14.13	10.57	25.07	8.2	18.47	15.23	16.23	7.47	21.3	26.43		8.27	24.93	8.53	8.13	15.33	10.63	18.13
[truncated: 58 more columns]
