# Supplementary material for: Inducible and reversible phenotypes in a novel mouse model of Friedreich’s Ataxia
Source: eLife. 2017 Dec 19;6:e30054. doi: 10.7554/eLife.30054 (PMC5736353; doi:10.7554/eLife.30054)
Supplement: Figure 3—source data 1. [file elife-30054-fig3-data1.xlsx]

## Sheet: Figure 3e
W12	genotype	QT	genotype	QT	genotype	QT
	TG-Dox	45.76	WT-Dox	36.3735	TG-NoDox	46.6
	TG-Dox	74.6053	WT-Dox	36.16	TG-NoDox	40.8
	TG-Dox	47.4	WT-Dox	37.5	TG-NoDox	38.431
	TG-Dox	70.4595	WT-Dox	36.3	TG-NoDox	37.3
	TG-Dox	76.3235	WT-Dox	44.56	TG-NoDox	40.5
	TG-Dox	58.2	WT-Dox	48.9	TG-NoDox	39.8358
	TG-Dox	37.3
	TG-Dox	41.5
	TG-Dox	40.6042
	TG-Dox	41
	TG-Dox	41
	TG-Dox	43.7895
	TG-Dox	46.0253
	Mean	51.0744	Mean	39.9656	Mean	40.5778
	sd	13.9406	sd	5.43753	sd	3.23189
	se	3.86644	se	2.21986	se	1.31941
W24	genotype	QT	genotype	QT	genotype	QT	genotype	QT
	TG-Dox	74.5172	WT-Dox	36.1	TG-NoDox	35.8	TG-DoxR	34.9
	TG-Dox	54.2222	WT-Dox	37.8	TG-NoDox	43.25	TG-DoxR	36.2
	TG-Dox	39.0845	WT-Dox	44.06	TG-NoDox	40.8	TG-DoxR	50.4
	TG-Dox	70.8226	WT-Dox	41.4	TG-NoDox	40.1	TG-DoxR	42.2516
	TG-Dox	90.5405	WT-Dox	43.1	TG-NoDox	37.8	TG-DoxR	41.1
	TG-Dox	87.181	WT-Dox	49	TG-NoDox	42.7	TG-DoxR	40.7
	TG-Dox	73.5484					TG-DoxR	47.46
	TG-Dox	56
	Mean	68.2396	Mean	41.91	Mean	40.075	Mean	41.8588
	sd	17.4302	sd	4.63066	sd	2.86177	sd	5.5804
	se	6.16251	se	1.89046	se	1.16831	se	2.10919

## Sheet: Figure 3f
W12	genotype	VST (mm)	genotype	VST (mm)	genotype	VST (mm)
	TG-Dox	0.468	WT-Dox	0.541	TG-NoDox	0.503
	TG-Dox	0.592	WT-Dox	0.474	TG-NoDox	0.5
	TG-Dox	0.459	WT-Dox	0.533	TG-NoDox	0.427
	TG-Dox	0.483	WT-Dox	0.602	TG-NoDox	0.522
	TG-Dox	0.496	WT-Dox	0.497	TG-NoDox	0.439
	TG-Dox	0.471	WT-Dox	0.548	TG-NoDox	0.452
	TG-Dox	0.446
	TG-Dox	0.6175
	TG-Dox	0.486
	TG-Dox	0.492
	TG-Dox	0.45
	TG-Dox	0.497
	TG-Dox	0.492
	Mean	0.496115	Mean	0.5325	Mean	0.473833
	sd	0.0513761	sd	0.0443294	sd	0.0393417
	se	0.0142492	se	0.0180974	se	0.0160612
W24	genotype	VST (mm)	genotype	VST (mm)	genotype	VST (mm)	genotype	VST (mm)
	TG-Dox	0.648	WT-Dox	0.4625	TG-NoDox	0.433	TG-DoxR	0.443
	TG-Dox	0.563	WT-Dox	0.5096	TG-NoDox	0.488	TG-DoxR	0.519
	TG-Dox	0.507	WT-Dox	0.479	TG-NoDox	0.405	TG-DoxR	0.493
	TG-Dox	0.488	WT-Dox	0.443	TG-NoDox	0.486	TG-DoxR	0.402
	TG-Dox	0.63376	WT-Dox	0.476	TG-NoDox	0.497	TG-DoxR	0.4266
	TG-Dox	0.536	WT-Dox	0.539	TG-NoDox	0.451	TG-DoxR	0.478
	TG-Dox	0.562					TG-DoxR	0.443
	TG-Dox	0.532
	Mean	0.55872	Mean	0.48485	Mean	0.46	Mean	0.4578
	sd	0.0567418	sd	0.0343752	sd	0.0365075	sd	0.0406564
	se	0.0200613	se	0.0140336	se	0.0149041	se	0.0153667

## Sheet: Figure 3g
W12	genotype	PWT (mm)	genotype	PWT (mm)	genotype	PWT (mm)
	TG-Dox	0.527	WT-Dox	0.499	TG-NoDox	0.493
	TG-Dox	0.612	WT-Dox	0.426	TG-NoDox	0.509
	TG-Dox	0.5	WT-Dox	0.513	TG-NoDox	0.471
	TG-Dox	0.433	WT-Dox	0.493	TG-NoDox	0.489
	TG-Dox	0.471	WT-Dox	0.487	TG-NoDox	0.474
	TG-Dox	0.463	WT-Dox	0.57	TG-NoDox	0.427
	TG-Dox	0.488
	TG-Dox	0.542
	TG-Dox	0.485
	TG-Dox	0.452
	TG-Dox	0.575
	TG-Dox	0.563
	TG-Dox	0.441
	Mean	0.504	Mean	0.498	Mean	0.477167
	sd	0.0557345	sd	0.0463465	sd	0.0281739
	se	0.015458	se	0.0189209	se	0.0115019
W24	genotype	PWT (mm)	genotype	PWT (mm)	genotype	PWT (mm)	genotype	PWT (mm)
	TG-Dox	0.634	WT-Dox	0.4875	TG-NoDox	0.408	TG-DoxR	0.411
	TG-Dox	0.575	WT-Dox	0.5096	TG-NoDox	0.458	TG-DoxR	0.468
	TG-Dox	0.574	WT-Dox	0.404	TG-NoDox	0.473	TG-DoxR	0.51
	TG-Dox	0.589	WT-Dox	0.4686	TG-NoDox	0.456	TG-DoxR	0.435
	TG-Dox	0.615	WT-Dox	0.476	TG-NoDox	0.448	TG-DoxR	0.4266
	TG-Dox	0.559	WT-Dox	0.5145	TG-NoDox	0.468	TG-DoxR	0.536
	TG-Dox	0.605					TG-DoxR	0.414
	TG-Dox	0.476
	Mean	0.578375	Mean	0.4767	Mean	0.451833	Mean	0.457229
	sd	0.0480236	sd	0.0399482	sd	0.0232415	sd	0.0492338
	se	0.0169789	se	0.0163088	se	0.0094883	se	0.0186086
