# Supplementary material for: Inducible and reversible phenotypes in a novel mouse model of Friedreich’s Ataxia
Source: eLife. 2017 Dec 19;6:e30054. doi: 10.7554/eLife.30054 (PMC5736353; doi:10.7554/eLife.30054)
Supplement: Figure 4—source data 1. [file elife-30054-fig4-data1.xlsx]

## Sheet: Figure 4a
WT-DOX	TG-DOX	TG-DOX-RESCUE
0	20	61
0	82	264
0	236	21
0	54	62
0	421	55
0	23	391
0	102	24
0	136	29
0	65	54
0	144	37
	221
	61
	141
	49
	173
	83
	46
	129
	35
	42
	24
	28
	84
	55
	66
	176
	107
	156
	223
	96
	38
	140
	21
	25
	60
	84
	27
	42
	39
	48
	238
	232
	91
	199
	27
	77
	186
	129
	25
	75
	21
	129
	48
	38
	52

## Sheet: Figure 4b
WT-DOX	TG-DOX	TG-DOX-RESCUE
28	1	6
11	48	4
32	6	13
6	7	1
91	2	4
60	130	6
95	36	9
11	50	4
153	4	4
171	3	18
10	13	22
13	94	4
12	16	29
28	31	13
28	94	22
28	19	3
4	13	9
136	12	10
159	2	4
59	5	4
181	241	5
13	7	5
18	15	1
44	7	9
12	14	16
12	1	7
	64	2
	6	3
	16	2
	52	5
	1	2
	3	2
	4	12
	12	6
	4	5
	17	2
	167	2
	3	9
	4	6
	6	9
	3	15
	8	4
	2	8
	4	2
	7	17
	4	48
	4	5
	3	9
	8	48
	9	7
	17	2
	42	9
	9	4
	17	10
	33	15
	3	1
	106	15
	45	15
	31	5
	8	11
	157	7
	9	7
	4	5
	4	11
	2	1
	4	6
	34	5
	23	2
	12	2
	27	5
	8	14
	41	11
	10	2
	16	4
	13	11
	17	2
	2	22
	16	2
	33	1
	20	5
	4	1
	46	8
	94	4
	53	4
	21	20
	12	22
	112	23
	17	8
	4	7
	17	26
	1	4
	31	5
	37	10
	13	16
	9	24
	60	6
	1	5
	18	18
	84	6
	12	22
	4	10
	5	14
	33	18
	1	13
	78	1
	33	6
	45	32
	18	33
	18	3
	90	17
	24	5
	19	7
	17	35
	141	6
	16	1
	29	5
	2	34
	6	10
	16	35
	11	4
	12	4
	9	10
	15	1
	33	1
	49	48
	4	5
	11	5
	8	11
	8	16
	13	14
	19	4
	65	8
	17	48
	26	15
	33	4
	92	8
	68	11
	7	11
	111	39
	6	10
	5	27
	44	23
	11	1
	15	11
	27	5
	11	31
	16
	5
	82
	72
	7
	119
	27
	8
	5
	12
	55
	34
	58
	263
	9
	22
	7
	8
	6
	2
	6
	7
	7
	10
	6
	120
	30
	46
	1
	13
	8
	4
	22
	1
	4
	6
	9
	14
	1
	33
	2
	8
	11
	2
	22
	3
	6
	26
	52
	10
	2
	75
	17
	20
	38
	4
	5
	6
	6
	8
	2
	11
	28
	15
	9
	2
	8
	86
	36
	2
	10
	17
	9
	14
	22
	17
	1
	12
	11
	3
	20
	7
	4
	49
	1
	54
	122
	1
	43
	11
	8
	10
	8
	18

## Sheet: Figure 4c
WT-DOX	TG-DOX	TG-DOX-RESCUE
3	1931	1
3	30	2
1	2897	2
3	89	1
4	183	3
4	3	2
1	23	16
3	55	1
2	1	1
4	1038	7
1	269	4
14	14	7
2	4	16
2	5	1
8	140	12
9	29	20
19	16	1
17	9	1
2	1	4
29	32	15
2	6	1
1	7	4
4	9	3
3	2	2
8	4	10
44	9	1
4	28	9
21	6	2
1	3	7
5	1	8
12	1	6
1	6	2
5	5	3
20	3	3
20	6	1
2	5	3
3	58	5
4	11	1
62	99	7
20	2	2
7	58	7
11	5	4
11	19	5
9	52	2
11	1	2
6	3	3
7	111	1
2	40	1
44	2	1
15	5	4
4	27	3
1	5	5
10	9	1
1	8	2
3	8	16
11	25	5
5	1	1
9	112	6
4	1	2
4	3	1
2	41	1
5	22	4
361	3	8
6	1	1
11	10	1
6	71	1
1	4	17
3	4	3
1	1	1
6	2372	18
1	1	4
14	35	1
4	2	10
45	1108	1
3	653	14
7	1	6
40	2	2
1	149	9
2	2	2
1	2	7
2	67	1
20	167	7
5	33	11
3	32963	1
103	2	7
6	201	1
4	2	8
12	13	2
11	19	4
8	2	1
3	23	18
1	18	2
17	1	8
70	117	3
9	4	4
3	7	10
5	3	1
13	7	15
4	1	2
1	24	23
2	22	3
26	1	3
1	55	2
1	139	9
4	11	9
2	21	11
1	2	1
2	2	2
29	56	5
5	20	4
1	18	2
2	7	17
30	6	15
8	17	1
9	6	1
3	74	3
1	5	4
7	2	6
1	7	3
10	119	7
2	25	12
4	2	3
3	6	1
10	12	6
48	3	7
7	3	1
43	8	3
3	136	5
1	1	1
30	10	1
1	1	4
73	2	4
11	29	4
1	144	6
491	85	2
15	1	5
10	298	8
7	9	3
22	2	1
2	6	1
6	3	1
51	23	3
143	7	15
3	70	3
1	299	5
7	1	13
1	19	2
5	15	22
55	14	1
2	18	13
4	3	3
3	14	3
11	10	12
48	354	5
258	69	4
7	4	6
261	1	39
31	119	2
6	3	2
85	4	6
4	466	3
12	6	3
2	15	10
27	39	16
4	105	14
2	8	2
21	9	10
13	73	9
18	5	1
2	2	4
2	4	2
5	1	6
36	46	3
5	10	14
11	8	5
1	24	6
10	4131	6
116	6	2
1	3	18
1	85	20
44	5	3
2	147	6
8	4	2
1	1	1
6	2	3
1	6	1
2	7	1
7	2	16
2	7	1
5	7	2
7	4	1
4	36	1
1	13	4
3	67	7
2	8	13
1	1	36
10	2	4
4	19	14
28	69	3
2	36	1
16	8	1
4	19	12
14	9	16
2	11	11
4	18	4
1	19	6
9	8	10
14	16	15
25	2	20
1	34	4
9	1	1
1	37	6
3	3	4
3	278	4
23	9	4
11	3	1
7	20	3
6	2	5
22	9	10
4	28	2
3	5	2
9	2	1
2	13	3
4	16	8
4	1	3
11	8	4
56	1	287
3	8	4
6	35	5
7	1	34
14	1	3
1	3	8
2	30	1
2	15	4
2	1319	1
1	10	13
3	32	6
4	33	3
13	7	1
11	1	14
4	1	2
4	32	24
1	6	4
2	102	4
17	33	1
4	4	2
6	2	15
52	4	6
89	1	6
15	4	3
1	5	4
1	5	4
9	139	5
75	1	2
5	6	29
12	138	1
1	13	2
1	15	5
4	2	1
7	2	107
1	21	9
1	48	2
9	9	3
1	29	5
25	9	9
28	4	5
2	1	2
6	5	5
2	3	1
13	2	1
5	117	5
1	11	2
57	20	37
6	5	2
2	12	12
7	24	1
10	11	4
2	124	4
183	22	3
5	7	4
7	14	1
2	11	10
23	3	1
18	273	1
44	67	2
3	42	1
12	4	4
1	17	5
10	2	3
36	189	5
8	5	13
7	91	3
17	10	2
3	165	8
1	1	12
2	1	21
18	46	11
5	9	8
45	50	5
12	111	2
2	15	11
15	2	2
20	11	3
24	1	2
7	32	2
5	1	1
2	1	11
9	4	5
6	25	2
6	47	2
18	13	2
12	2	3
17	56	40
7	18	4
5	3	2
2	16	4
7	1	7
7	37	1
6	3	5
14	14	12
6	12	2
6	1	2
7	1	1
10	4	11
18	36	7
2	3829	2
7	1	7
19	5	6
9	35	7
10	16	2
2	2	1
8	1	19
1	1	11
1	1	1
8	16	1
17	47	64
14	107	10
4	35	1
9	4	3
33	2	8
3	32	12
4	2	3
2	14	1
2	6	15
6	1	2
1	10	7
1	4	5
2	72	13
2	1	39
32	2	1
8	5	1
15	17	177
8	25	2
3	40	8
35	21	11
3	2	5
12	490	1
16	3	3
11	3	14
7	9	2
2	1	8
33	3	8
4	49	26
11	8	4
29	1015	24
6	11	1
12	6	8
7	22	8
5	10	1
16	1	2
3	3	17
6	11	6
4	6	3
17	7	3
2	29	5
3	1	2
3	290	9
4	3	2
11	37	4
1	3	4
1	4	5
5	2	1
8	8	3
9	26	4
5	24	8
6	4	16
37	10	2
4	39	10
5	3	3
42	20	4
279	33	7
2	126	4
2	1	10
2	20	4
1	58	7
2	5	3
3	2	60
7	40	2
1	2	6
3	8	4
26	3	6
28	7	8
10	1	10
9	10	1
7	3	5
5	2	10
446	9	1
7	43	1
1	29	1
6	6	11
27	3	14
24	5	2
21	63	20
204	13	5
2	2	2
18	19	2
10	13	3
6	16	7
1	3	2
1	4	4
7	59	1
28	8	26
14	2	2
2	2	9
57	5	4
1	5	1
7	4	3
2	28	2
72	9	3
2	1	6
1	6	11
9	7	2
1	30	8
7	55	1
36	4	11
5	6	3
31	15	3
14	32	5
2	24	3
1	3	3
5	3	1
16	1	1
2	2	4
5	4	7
16	5	2
2	2	6
31	1	3
4	16	5
5	7	1
1	7	1
6	4	3
4	1	26
11	3	1
1	30	4
7	3	6
9	1	11
1	11	3
24	1	4
4	2	2
22	1	13
6	1	3
9	4	8
8	58	5
2	3	5
1	7	4
10	2	2
14	4	5
6	15	5
2	1	1
1	11	65
1	5	1
1	5	1
12	32	7
6	43	4
15	3	11
60	7	7
1	4	1
2	16	12
4	4	5
1	8	2
2	7	4
8	3	5
7	4	5
1	1	2
34	24	6
8	3	18
1	100	3
3	1	1
1	21	1
26	6	7
2	50	2
7	5	10
2	9	5
11	6	1
4	13	7
1	1	3
5	4	4
5	9	10
2	10	1
8	6	4
4	3	2
14	1	46
7	22	16
4	8	9
3	2	1
2	4	1
1	6	2
2	44	6
3	29	9
15	1	19
4	15	4
2	1	1
37	9	3
20	12	6
15	14	1
1	1	4
3	5	3
14	84	3
5	93	7
4	67	4
6	55283	6
3	4	3
2	3	8
2	14	3
12	30	1
3	5	2
6	29	2
4	60	5
33	36	7
1	39	2
3	3	5
1	1	8
4	4	1
9	11	2
21	1	3
3	11	15
9	15	6
15	133	11
6	3	1
13	97	6
45	47	9
4	2	3
2	12	1
8	3	7
3	3	2
34	1	1
10	633	6
8	1	8
17	2	8
7	12	3
8	2	2
7	21	2
15	4	6
1	3	4
1	182	5
4	15	4
3	10	7
26	1	3
1	5	6
26	1	3
1	11	3
4	4	9
13	42	1
7	19	1
14	6	4
7	131	7
2	7	2
3	6	11
8	7	4
2	8	2
1	3	1
8	100	4
13	27	3
7	8	9
2	26	19
15	43	1
10	4	4
4	1	3
2	13	7
17	19	3
16	11	6
9	9	8
63	67	5
11	94	12
15	4506	1
8	3	7
22	2	2
14	1	1
43	25	2
2	12	4
5	2	12
1	32	5
20	3	9
6	7	1
3	72	26
2	3	8
7	1	5
13	39	4
15	23	1
39	1	2
15	14	12
14	1	1
5	18	2
4	5	2
31	65	24
1	3	1
3	54	1
3	1	8
26	29	6
35	46	16
6	4	1
2	10	7
4	3	2
2	10	1
23	12	5
9	2	4
19	2	7
1	4	3
1	3	2
7	4	13
4	2	2
4	3	2
2	2	9
1	39	3
144	16	9
8	53	3
3	5	1
6	1	12
5	4	5
2	19	12
1	115	4
5	5	23
2	9	18
2	1	3
4	4	2
83	4	1
13	8	8
4	22	2
1	2	4
18	1	37
5	2	11
2	121	1
12	2	3
3	6	10
5	2	13
21	4	1
8	8	7
8	1	2
6	7	2
159	1	5
32	19	12
7	1	2
66	5	18
4	2	2
18	2	5
2	6	17
1	15	8
8	3	4
1	21	7
13	17	5
2	1	1
10	1	8
3	2	5
3	3	2
3	5	6
3	3	20
40	6	5
35	17	1
38	19	12
3	60	3
4	2	4
22	19	4
24	3	15
3	1	5
4	2	1
5	1	8
10	8	3
9	34	4
8	55	2
17	1	1
60	20	24
14	14	4
1	4	1
1	2	18
1	2	1
11	10	4
7	2	5
20	12	6
53	6	1
8	1	5
1	8	7
5	11	4
2	3	8
1	6	2
4	9	2
2	1	1
22	4	2
2	81	5
5	2	6
4	7	3
5	9	4
4	12	3
18	26	2
50	1	6
2	126	11
2	1	1
458	13	31
2	7	2
1	10	10
8	12	4
5	2	5
7	6	1
2	11	4
115	10	2
166	4	3
6	43	1
1	2	2
1	6	6
2	172	23
1	5	10
8	7	1
2	14	2
1	1	8
7	2	16
7	6	7
25	6	5
2	8	2
8	17	1
26	3	5
13	3	7
8	1	1
6	33	4
8	85	6
39	13	2
1	81	1
8	7	1
5	3	5
40	5	6
12	12	31
6	10	1
3	41	5
14	5	2
5	36	1
3	3	5
2	17	1
7	39	1
9	193	4
17	15	3
36	35	4
2	20	2
6	7	2
1	2	3
43	1	2
3	2	1
1	16	12
8	3	2
17	257	2
3	9	12
23	1	3
1	75	1
39	1	2
11	34	2
9	11	12
10	1	12
4	7	3
53	9	8
6	5	1
255	9	24
12	3	7
4	1	9
5	46	4
12	31	227
15	11	2
1	8	1
2	2	1
3	143	3
10	65	6
17	3	4
1	1	5
4	45	2
4	22	9
2	6	11
1	4	3
1	6	111
2	55	8
17	6	1
5	2	7
4	3	1
2	2	1
3	54	15
32	5	25
8	5	15
2	4	6
2	12	44
2	15	6
30	1	3
239	1	1
14	3	8
56	1	1
31	24	1
3	10	2
38	5	1
30	38	7
2	2	171
12	63	8
12	212	13
11	2	4
1	20	4
136	3	3
1	128	2
12	23	1
2	12	1
8	7	4
9	4	5
3	5	3
7	14	2
7	121	10
13	1	4
433	1	59
3	21	6
2	6	8
10	59	2
2	2	16
11	14	2
1	6	1
1	8	1
25	17	5
8	270	11
25	7	1
6	9	9
8	22	12
2	10	7
2	1	6
2	5	9
3	2	22
1	43	3
1	705	5
2	2	35
4	2	3
4	43	6
1	7	10
49	18	1
4	2	9
1	180	5
11	3	2
4	29	2
2	148	5
2	10	4
4	29	2
11	3	18
20	4	4
4	1	2
2	10	2
10	6	12
3	43	8
21	2	1
29	3	3
19	3	12
9	60	2
1	2	3
5	3	12
130	212	2
1	1	3
2	5	5
9	19	3
2	6	2
4	135	25
9	226	3
2	4	1
1	24	3
6	14	8
25	13	9
2	32	1
2	6	5
64	1	1
19	74	5
2	54	2
2	3	37
10	1	8
5	13	1
19	52	3
13	1	9
3	13	24
2	26	10
3	6	19
2	8	1
5	2	2
2	2	15
10	1	2
3	4	1
9	4	9
1	10	2
2	12	4
1	146	2
2	12	7
4	7	3
3	136	6
2	8	4
4	2	9
2	10	9
2	13	5
17	6	8
5	22	8
4	27	2
6	2	5
4	1	3
2	30	4
1	4	1
4	2	5
1	22	4
	3	21
	14	2
	17	6
	51	1
	6	4
	2	9
	2	10
	1	1
	8	6
	2	22
	79	3
	2	8
	39	12
	60	1
	11	2
	2	12
	34	1
	43	3
	50	24
	4	29
	5	5
	6	10
	4	3
	2	7
	1	7
	8	2
	41	7
	4	1
	1	14
	2	9
	4	29
	2	4
	33	11
	4	16
	10	19
	2	8
	10	1
	1	3
	18	4
	3	3
	27	2
	2	6
	5	5
	1	11
	13	11
	2	5
	1	3
	8	1
	4	3
	473	9
	2	3
	20	2
	47	7
	15	4
	3	6
	4	1
	8	7
	2	3
	29	12
	32	7
	12	8
	1	1
	2	1
	4	8
	20	1
	1	2
	30	11
	22	10
	2	2
	12	12
	13	2
	1	3
	2	3
	13	5
	8	3
	31	4
	2	4
	33	6
	7	1
	7	3
	8	6
	6	2
	10	4
	3	15
	2	6
	8	10
	10	9
	2	1
	8	2
	84	5
	4	5
	10	7
	2	1
	3	4
	1	6
	10	6
	4	2
	16	3
	5	3
	1	7
	9	2
	39	5
	5	1
	1	4
	6	2
	6	1
	9	9
	20	1
	14	1
	16	8
	4	1
	4	8
	14	5
	4	5
	15	1
	16	5
	8	5
	4	2
	1285	1
	9	1
	4	6
	11	4
	8	34
	15	2
	12	4
	52	4
	15	2
	134	6
	31	7
	7	3
	14	3
	1	10
	1	1
	15	1
	7	3
	7	4
	22	1
	3	1
	3	1
	21	9
	26	17
	17	4
	9	1
	3	3
	52	7
	15	10
	3	2
	27	1
	7	1
	1	1
	25	6
	2	10
	9	3
	12	249
	6	3
	15	4
	6	9
	1	17
	8	1
	5	3
	10	4
	1	1
	13	4
	7	5
	4	4
	1	9
	2	4
	2	4
	1	2
	7	2
	7	8
	1	5
	2	12
	2	6
	4	5
	8608	4
	5	1
	4	4
	8	12
	2	9
	4	17
	1	1
	11	4
	111	4
	3	4
	62	1
	1	13
	2	1
	66	1
	324	2
	4	2
	9	3
	9	2
	4	1
	2	7
	5	15
	5	14
	26	5
	22	11
	17	2
	28	1
	26	1
	7	11
	32	9
	2	4
	9	5
	8	6
	2	4
	18	2
	2	2
	7	9
	32	2
	11	24
	18	8
	3	7
	54	4
	55	1
	8	2
	22	8
	5	1
	13	5
	3	8
	32	4
	15	2
	7	1
	5	3
	7	5
	5	3
	25	12
	10	4
	520	7
	8	5
	49	4
	1	8
	1	22
	10	5
	2	1
	2	1
	10	18
	2	2
	4	9
	11	32
	3	1
	4	2
	2	5
	2	13
	6	2
	6	4
	10	2
	5	1
	8	5
	5	3
	10	2
	76	14
	34	3
	114	5
	3	5
	24	23
	23	25
	28	2
	10	6
	28	4
	8	1
	9	12
	5	2
	38	5
	2	3
	4	6
	63	5
	2	10
	3	4
	24	232
	3	3
	20	10
	1	6
	4	3
	2	2
	3	1
	135	2
	15	3
	2	1
	2	5
	15	3
	12	4
	98	3
	5	1
	2	7
	1	1
	32	1
	3	2
	2	9
	45	8
	1	7
	1	7
	30	13
	1	9
	8	3
	1	41
	155	11
	37	3
	49	5
	7	6
	1	4
	5	1
	3	4
	63	4
	11	2
	11	2
	13	1
	24	2
	17	7
	35	8
	6	2
	1	1
	78	6
	13	3
	4	5
	24	10
	3	5
	4	5
	39	9
	3	8
	10	7
	1	1
	7	4
	25	1
	97	1
	10	1
	2	2
	3	2
	8	6
	2	21
	20	3
	3	2
	29	8
	20	9
	49	1
	4	3
	11	2
	10	2
	199	4
	17	3
	8	6
	43	6
	2	2
	1	2
	9	2
	14	5
	13	4
	3	15
	5	1
	55	18
	1	1
	4	9
	4	2
	32	5
	4	3
	11	10
	11	6
	6	15
	118	4
	9	1
	1	3
	264	15
	5	4
	1	4
	95	3
	22	2
	26	2
	3	6
	1	2
	8	1
	9	2
	9	9
	23	9
	80	10
	1	1
	20	8
	116	1
	7	6
	16	3
	3	4
	125	5
	2	4
	8	4
	288	10
	7	9
	4	1
	463	4
	9	12
	15	8
	1	11
	36	7
	23	5
	14	3
	25	2
	4	11
	2	4
	20	2
	322	5
	2	2
	16	3
	10	4
	2	3
	12	1
	2	13
	9	3
	24	6
	1	1
	3	39
	6	3
	9	2
	30	5
	11	5
	4	3
	146	5
	79	14
	19	10
	1	1
	3	2
	7	3
	28	2
	1	6
	9	6
	18	8
	9	21
	2	1
	20	15
	9	1
	14	5
	166	5
	4	4
	3	4
	3	3
	11	4
	2	7
	27	2
	9	2
	13	1
	7	13
	12	5
	42	9
	7	9
	38	7
	10	7
	2	7
	2	55
	7	5
	47	4
	9	3
	2	7
	10	1
	3	7
	18	3
	91	2
	11	1
	4	3
	84	2
	1	6
	4	2
	4	2
	7	4
	70	7
	1	8
	6	1
	3	7
	39	3
	35	1
	16	2
	16	2
	1	3
	5	4
	5	1
	208	2
	1	9
	1	3
	5	4
	5	12
	39	2
	2	2
	5	2
	1	6
	8	13
	5	9
	1	3
	7	1
	1	12
	10	2
	12	1
	4	65
	25	16
	5	3
	8	19
	1	2
	60	8
	19	9
	14	2
	1	3
	195	3
	27	3
	123	1
	7	2
	1	4
	1	2
	49	7
	31	969
	3	10
	43	3
	17	3
	18	3
	3	5
	9	6
	7	1
	9	2
	2	6
	20	531
	25	2
	7	13
	1	4
	12	3
	10	9
	144	36
	12	1
	1	6
	5	4
	24	18
	1	1
	4	11
	76	4
	2	1
	6	13
	1849	5
	7	2
	20	14
	4	281
	1	1
	21	49
	2	2
	1	4
	4	3
	9	1
	36	4
	76	4
	29	13
	7	9
	191	2
	8	1
	1	2
	62	28
	1	3
	1	267
	5	6
	1	9
	5	2
	15	2
	6	1
	13	31
	1	4
	8	312
	4	4
	15	4
	2	1
	13	3
	2	20
	5	38
	4	2
	21	1977
	39	9
	9	61
	14	14
	2	2
	4	1
	4	1
	70	3
	1	14
	9	2
	150	17
	30	2
	465	12
	43	2
	4	4
	1	12
	18	3
	10	1
	43	5
	17	29
	2	27
	3	4
	3	6
	4	11
	2	12
	11	1
	22	1
	10	9
	65	1
	1	5
	1	9
	5	16
	11	19
	50	3
	5	11
	13	1
	20	22
	27	13
	3	2
	60	1
	1	1
	7	5
	1	12
	1	15
	10	1
	14	9
	53	1
	1	1
	18	7
	23	1
	1	16
	1	53
	39	3
	18	4
	55	4
	7	4
	15	4
	2	3
	6	1
	1	11
	13	7
	2	11
	5	7
	12	7
	21	2
	2	3
	9	3
	13	15
	443	1
	12	21
	9	14
	2	2
	1	4
	1	4
	4	35
	27	2
	24	47
	10	1
	8	1
	29	11
	21	2
	4	4
	88	104
	1	2
	5	3
	23	1
	12	8
	1	1
	15	14
	4	13
	18	7
	6	15
	29	6
	4	1
	1	38
	3	13
	2	5
	18	2
	61	3
	1	23
	2	1
	8	1
	9	3
	2	1
	12	1
	2	890
	2	26
	2	1
	2	4
	4	3
	8	129
	2	6
	14	9
	2	3
	4	4
	2	7
	66	1
	13	3
	1	11
	3	7
	3	16
	4	8
	1	2
	10	23
	6	2
	4	44
	2	4
	2	14
	1	13
	3	27
	5	7
	2	5
	16	4
	105	9
	5	2
	1	4
	27	16
	9	2
	3	15
	7	3
	3	1
	22	7
	19	5
	37	9
	9	1
	6	182
	10	8
	2	2
	31	2
	17	16
	1	7
	4	84
	2	3
	9	16
	6	4
	10	4
	8	1
	15	5
	5	22
	1	2
	3	4
	40	1
	9	151
	1	3
	10	5
	9	1
	2	11
	5	6
	1	4
	79	6
	20	2
	6	1
	1	2
	4	6
	47	5
	11	14
	16	1
	1	8
	6	19
	6	17
	12	5
	11	2
	2	6
	6	1
	12	1
	10	7
	1	1
	11	2
	4	1
	6	7
	2	1
	16	37
	6	3
	25	5
	1	3
	28	1
	26	3
	10	1
	22	6
	6	2
	2	5
	6	3
	11	2
	5	9
	3	2
	42	6
	9	4
	6	6
	1	2
	3	3
	3	31
	3	1
	2	6
	3	4
	4	2
	1	9
	2	5
	13	34
	16	5
	6	10
	2	5
	19099	3
	9	1
	4	4
	20	4
	1	2
	20	50
	5	6
	1	1
	8	2
	13	2
	1	9
	11	3
	1	11
	4	3
	16	4
	11	1
	3	4
	31	29
	6	4
	7	268
	3	3
	4	1
	2	2
	4	6
	6	1
	4	284
	8	18
	62	4
	5	2
	13	1
	14	1
	12	1
	2	1
	2	3
	11	2
	2	2
	7	12
	24	2
	183	1
	106	3
	1	2
	7	1
	15	4
	2	106
	3	12
	12	1
	1	10
	3	4
	2	3
	3	12
	11	4
	4	17
	5	2
	2	3
	4	2
	2	5
	1	6
	35	3
	3	20
	4	1
	1	21
	6	1
	5	1
	42	13
	2	3
	1	32
	3	1
	2	6
	23	319
	3	8
	23	1
	48	1
	1	1
	2	1
	11	1
	6	1
	20	3
	15	2
	2	4
	7	2
	1	43
	7	6
	15	24
	10	4
	1	6
	13	12
	11	1
	16	5
	7	4
	4	6
	3	5
	4	4
	1	5
	30	4
	1	2
	6	20
	9	2
	10	2
	4	3
	42	5
	4	1
	5	2
	25	4
	12	1
	2	4
	14	475
	20	2
	7	2
	12	1
	6	240
	23	13
	4	8
	37	10
	1	12
	11	3
	5	2
	8	8
	13	2
	14	10
	4	6
	6	15
	1	7
	1	6
	4	5
	3	3
	4	2
	20	17
	3	6
	11	1
	1	6
	11	59
	2	5
	7	1
	15	5
	8	2
	2	1
	1	1
	7	5
	3	3
	9	30
	17	2
	17	3
	2	2
	3	22
	2	1
	4	1
	2	5
	11	28
	6	1
	8	3
	8	1
	10	217
	9	3
	2	11
	18	6
	6	4
	2	27
	11	11
	1	5
	10	1
	3	3
	14	13
	1	233
	11	2
	13	1
	7	104
	6	1
	31	7
	4	7
	10	66
	17	5
	18	5
	4	3
	7	427
	31	2
	33	2
	2	1
	2	1
	9	74
	2	4
	2	3
	10	6
	16	24
	1	7
	29	3
	4	1
	1	10
	1	105
	13	38
	7	20
	6	11
	7	3
	27	9
	7	11
	56	2
	6	31
	1	2
	71	11
	6	4
	8	5
	2	11
	11	1
	7	52
	10	2
	2	2
	5	4
	9	2
	10	12
	9	15
	90	2
	11	2
	1	4
	10	47
	8	233
	1	3
	1	27
	7	10
	7	3
	11	129
	9	104
	13	4
	7	2
	2	1
	11	16
	23	5
	1	6
	159	80
	43	2
	10	6
	58	5
	16	1
	11	1
	5	3
	206	1
	9	1
	19	2
	32	2
	1	20
	6	7
	3	3
	2	10
	2	41
	7	2
	3	5
	8	8
	1	2
	14	4
	16	14
	16	13
	10	2
	7	207
	3	5
	14	5
	9	4
	25	9
	19	7
	5	3
	1	1
	3	3
	22	7
	3	3
	1	1
	2	2
	516	2
	5	3
	4	6
	5	6
	8	9
	19	1
	4	1
	39	6
	5	3
	17	16
	1	8
	2	5
	54	6
	2	11
	25	13
	14	5
	5	2
	4	1
	12	5
	20	8
	4	2
	4	2
	2	4
	6	2
	3	10
	21	28
	1	3
	7	3
	2	19
	6	2
	4	2
	3	22
	11	3
	6	2
	1	5
	9	5
	5	3
	4	3
	9
[truncated: 310 more rows]

## Sheet: Figure 4f
Genotype	Aconitase	Mean	SE	CitrateSynthase	Aconitase/Citrate	Mean	SE	Genotype	%_Acon/Ci	Mean	SE
Tg|Dox	19.72	13.8254	0.597306	0.226305	87.139	86.6353	0.410379	Tg|Dox	62.234	61.8742	0.293089
Tg|Dox	12.5632			0.139512	90.0511			Tg|Dox	64.3137
Tg|Dox	9.19315			0.111141	82.7159			Tg|Dox	59.075
Tg|DoxR	15.5879	13.5992	0.212885	0.101809	153.109	120.451	3.32841	Tg|DoxR	109.349	86.0255	2.37712
Tg|DoxR	13.4444			0.117939	113.995			Tg|DoxR	81.4141
Tg|DoxR	11.7653			0.12483	94.2506			Tg|DoxR	67.313
Tg|ND	16.8263	15.5918	0.235289	0.117515	143.184	140.018	3.43412	Tg|ND	102.261	100	2.45262
Tg|ND	16.8025			0.0992933	169.221			Tg|ND	120.856
Tg|ND	13.1467			0.122124	107.65			Tg|ND	76.883
WT|Dox	20.756	17.1875	0.37639	0.169586	122.392	121.614	2.55973	WT|Dox	87.4115	86.8558	1.82814
WT|Dox	16.7906			0.170988	98.1974			WT|Dox	70.1318
WT|Dox	14.016			0.0971625	144.253			WT|Dox	103.024
