# Supplementary material for: Inducible and reversible phenotypes in a novel mouse model of Friedreich’s Ataxia
Source: eLife. 2017 Dec 19;6:e30054. doi: 10.7554/eLife.30054 (PMC5736353; doi:10.7554/eLife.30054)
Supplement: Figure 5—source data 1. [file elife-30054-fig5-data1.xlsx]

## Sheet: Figure 5f
Type	TG +	WT +	TG +/- Rescue
CM	65	11	2
	25	16	3
	15	19	3
	25	20	3
	14	10	66
	43		26
	25		63
	39		4
	26		5
	13
CM + EV	5	2	1
	18	5	0
	13	3	0
	5	0	1
	8	0	31
	30		22
	10		2
	15		3
	6		3
	3
AM	4	2	78
	1	1	171
	1	3	121
	1	0	123
	2	0	106
	2		0
	0		0
	6		96
	2		64
	0
