# Supplementary material for: Inducible and reversible phenotypes in a novel mouse model of Friedreich’s Ataxia
Source: eLife. 2017 Dec 19;6:e30054. doi: 10.7554/eLife.30054 (PMC5736353; doi:10.7554/eLife.30054)
Supplement: Figure 6—source data 1. [file elife-30054-fig6-data1.xlsx]

## Sheet: Figure 6b
Myelin			Axon
Wt +	Tg +	Tg +/- Rescue	Wt +	Tg +	Tg +/- Rescue
546	1139	1413	592	1764	562
502	269	2378	105	1937	84
589	478	236	339	109	164
640	620	328	168	175	214
460	657	361	93	168	122
1487	811	1127	1097	978	426
632	103	600	360	644	83
1379	435	200	292	158	213
513	781	1599	297	2455	999
575	222	799	123	1515	109
3226	467	205	4746	254	208
2413	1365	342	2851	633	2280
1125	471	713	1706	429	86
461	592	424	269	483	215
315	495	503	108	193	188
651	120	612	395	308	99
652	538	1075	480	1575	362
147	341	140	92	89	528
921	1344	250	542	135	851
682	717	184	178	167	421
447	558	244	341	157	412
858	387	362	622	244	187
196	332	217	93	196	157
391	511	425	740	157	155
355	121	318	105	93	145
448	463	1268	172	2021	105
840	207	334	677	201	219
1670	193	181	2497	143	158
660	276	1207	857	873	284
1585	583	2666	1445	3573	184
493	2500	665	239	587	3598
444	428	144	295	127	200
516	2601	2102	105	3119	4254
188	733	450	126	309	357
367	572	192	85	136	80
401	2844	142	436	112	1516
166	693	196	94	196	463
334	389	455	177	487	229
1963	343	1043	1373	1631	176
672	280	225	597	288	110
173	1510	169	112	147	1801
536	2325	131	142	102	4500
1290	596	442	2309	310	313
2436	360	205	3879	247	161
2246	1100	1427	2164	2046	1518
366	1006	2129	317	2038	167
624	315	149	278	98	86
206	474	992	107	1495	257
825	109	176	356	86	125
1178	1677	505	1895	550	1528
641	1359	1545	351	2674	1512
322	617	288	338	373	187
230	697	256	370	257	630
1379	390	524	1229	504	104
747	187	122	1256	103	356
217	401	176	160	302	345
270	237	608	119	592	235
851	802	275	1724	280	442
958	482	133	471	95	402
382	569	252	195	296	286
732	638	380	256	300	403
2261	520	139	3516	140	506
345	676	371	164	458	696
895	329	196	318	243	153
123	242	696	113	1267	170
676	871	414	686	495	1359
265	221	189	182	183	101
946	417	194	889	192	213
345	2007	445	413	398	2430
938	276	143	751	80	155
348	814	185	316	205	544
2001	479	1046	4158	1646	368
865	1333	290	1410	259	1793
1615	240	282	2700	292	190
352	423	223	551	249	171
853	757	397	1123	430	947
712	237	296	1273	439	190
507	338	306	446	230	190
553	225	143	484	141	144
3297	468	183	6186	133	672
344	363	480	105	320	140
778	702	303	319	101	1022
2344	165	347	2538	655	132
634	132	652	251	996	152
115	593	278	178	267	656
452	1180	293	136	282	2046
262	345	333	365	257	244
125	347	161	88	96	280
156	478	611	170	726	223
140	181	354	217	212	174
697	302	300	457	274	105
755	728	161	1118	153	603
441	464	85	592	80	455
1117	233	1327	1753	2466	245
1604	454	96	2435	94	521
353	947	185	254	203	1134
454	147	324	623	181	111
337	98	594	282	1026	83
170	318	256	223	372	144
194	230	1656	292	2164	263
264	263	615	331	292	368
553	257	400	921	610	254
420	182	184	95	155	212
2600	291	332	3590	265	305
513	154	322	133	146	183
286	480	344	150	376	389
772	390	2008	987	2815	476
1959	425	261	1870	124	235
892	387	386	627	409	560
4724	412	402	5951	105	400
332	299	2203	532	3569	148
1103	214	228	1784	225	179
441	496	352	95	293	523
257	231	180	176	165	322
1128	574	314	1391	303	450
250	990	124	349	162	965
766	187	257	948	181	82
169	156	533	81	888	206
315	212	267	115	207	100
561	334	150	813	91	251
763	1336	147	891	104	2405
858	219	854	313	1670	81
476	524	438	159	748	148
782	244	257	1389	215	161
907	165	162	1170	79	94
2805	377	549	6904	461	155
260	295	149	140	156	226
392	849	143	137	146	1544
309	181	270	126	299	284
367	118	177	777	179	170
4779	805	316	4947	237	1140
655	602	583	586	214	764
656	276	462	646	544	307
201	568	1304	195	1214	169
1952	2067	531	2599	500	2486
295	473	186	427	215	507
1464	1342	207	2672	207	2568
378	1390	214	164	298	2472
208	660	153	221	91	302
172	1059	253	166	188	1643
992	307	106	730	110	343
982	100	138	1859	130	142
1000	206	368	1044	376	134
630	821	1259	620	1948	798
120	248	150	108	168	216
248	513	673	86	936	580
1317	660	241	1995	303	568
545	567	582	243	507	698
304	1975	368	165	441	3430
1621	770	3191	2174	6298	718
97	332	216	129	176	255
682	738	302	653	81	972
249	271	257	188	223	240
830	415	286	985	287	623
693	738	2175	794	3781	1202
312	279	557	400	519	408
327	369	173	318	180	179
1175	280	381	429	731	245
862	653	108	594	100	1082
755	1957	635	438	610	2715
1941	841	228	2560	151	1839
593	1305	341	244	603	1350
307	509	228	428	159	755
407	183	191	156	208	188
408	481	339	499	382	473
903	470	542	812	144	572
1491	231	344	1160	158	181
2023	226	362	2292	88	108
197	439	2564	164	5534	583
449	565	967	205	1345	294
306	143	276	324	230	168
873	419	1395	1744	2276	107
864	1462	655	981	526	1862
1406	670	112	2337	96	1471
411	310	1950	127	2202	336
526	2278	265	554	145	3252
1417	530	482	1291	842	461
568	283	836	684	527	345
335	428	206	284	166	261
296	276	186	483	82	132
272	383	194	210	197	653
965	620	194	1781	221	720
556	1645	291	564	290	2588
114	508	307	79	219	798
197	470	259	86	218	478
3671	415	846	4510	1859	238
180	415	143	86	157	247
276	215	232	112	164	263
1735	640	1846	3362	3780	1041
284	314	153	495	86	256
307	99	180	125	133	90
444	1073	327	602	347	1600
616	497	182	191	248	512
174	134	187	114	89	123
442	533	783	105	1361	808
469	511	539	150	340	675
608	268	148	751	163	150
291	294	185	356	95	174
1032	800	236	1885	211	449
274	781	261	197	290	961
821	1148	164	928	115	1844
341	638	247	564	244	884
2359	161	257	3369	122	212
255	603	152	99	139	843
288	1897	268	216	338	3930
1071	285	179	731	173	277
479	853	942	282	582	796
179	129	196	311	185	121
150	225	461	102	178	258
478	486	121	413	80	174
248	284	1624	382	2712	138
1048	261	80	1062	83	476
898	510	152	1272	263	564
817	734	229	334	100	1037
469	663	587	101	732	695
1088	176	141	1511	139	230
1489	1014	554	1019	357	1677
634	609	370	617	164	924
2242	350	1057	3185	1325	451
558	92	257	537	145	97
101	754	327	88	327	609
805	606	694	525	522	777
461	304	462	631	395	216
450	623	203	328	97	669
151	457	334	100	165	369
468	213	367	179	306	352
609	525	174	1332	181	383
550	360	408	225	178	108
1153	173	664	1231	583	226
405	709	289	408	99	613
662	2078	334	775	153	3019
468	567	573	229	359	385
1534	584	350	2342	93	622
421	187	870	141	773	200
203	869	180	103	126	718
408	323	730	458	412	363
588	120	619	665	154	96
426	368	1084	206	986	259
1025	1569	1016	508	721	2249
265	240	295	243	179	220
854	185	392	1090	159	256
266	716	367	134	159	428
440	255	3069	80	2240	267
520	382	417	644	151	292
3009	218	1009	6536	621	147
201	171	1214	117	1331	103
362	469	471	231	339	616
1823	108	278	2105	186	83
1200	556	152	1592	89	703
634	268	1296	767	536	257
751	906	2413	963	2122	1206
298	247	253	289	167	265
1971	508	617	2475	590	514
461	1136	449	383	227	1805
555	698	319	271	276	1140
899	778	191	567	118	1294
413	845	268	153	140	1285
432	325	1070	327	776	234
1616	223	485	2280	310	138
791	158	409	438	257	158
797	1035	284	1201	193	785
1017	430	2217	1494	1525	326
801	319	150	1282	93	240
728	200	638	634	253	212
179	164	187	186	129	177
408	555	327	553	223	443
707	210	966	795	1077	282
216	276	414	100	326	115
479	2808	370	304	204	3637
318	673	126	222	103	887
494	750	268	546	82	227
949	203	695	1232	563	163
371	266	443	356	220	252
179	653	764	257	555	806
415	3532	305	483	194	2761
349	1209	223	557	84	1969
300	299	615	96	447	143
388	372	155	414	79	215
577	1728	333	309	267	2157
396	264	668	454	448	409
1111	615	333	387	282	488
480	152	528	228	237	194
285	1364	586	88	647	1732
451	958	557	494	486	1225
1364	999	1330	1613	904	1017
349	333	1020	115	1112	242
447	504	1119	739	987	429
2342	1029	425	3853	207	763
272	198	234	374	106	149
265	207	191	197	94	91
379	1811	181	747	81	1524
782	453	355	1062	127	259
2114	117	569	3790	187	203
981	794	201	484	79	204
383	162	181	384	102	147
433	675	202	112	108	250
208	576	1090	212	1125	562
724	273	539	673	496	180
129	341	526	151	311	433
514	1880	289	581	130	1449
623	190	361	977	256	115
120	781	196	172	236	146
298	367	847	274	986	401
267	611	281	182	326	483
1984	869	274	2778	200	573
259	559	1833	359	1672	109
1021	335	732	1101	453	156
483	269	1085	815	1014	110
685	313	279	879	130	103
221	371	939	317	534	98
467	436	2192	456	3195	106
156	464	592	207	277	922
613	268	382	605	169	239
434	813	672	647	845	1123
1515	135	1293	802	1357	81
391	752	365	811	109	769
317	368	1361	278	1681	404
451	157	201	107	133	241
211	569	236	202	114	808
517	335	188	469	94	151
303	677	280	224	86	118
197	2535	682	166	814	5114
646	1878	665	515	576	3273
465	1475	136	409	88	2066
161	232	191	117	117	137
301	291	421	148	259	423
555	235	142	172	101	256
219	227	936	300	403	293
262	367	189	335	115	240
248	336	723	231	936	398
360	614	1035	636	708	137
1042	339	663	1367	386	278
571	248	440	470	290	182
129	2282	262	193	154	4533
509	476	743	466	581	252
426	408	503	185	138	174
455	300	311	346	216	280
625	292	161	1042	97	558
430	310	925	585	783	321
340	516	949	491	1019	587
651	146	183	746	134	204
457	726	750	589	461	874
321	258	200	79	123	118
866	186	461	371	190	308
811	705	452	1122	354	833
318	171	493	247	545	84
360	216	207	249	85	233
545	181	468	525	168	224
207	607	2009	92	2209	937
177	479	4535	127	4039	649
1132	937	339	1318	262	808
215	414	4918	173	4367	465
508	508	8163	361	11666	749
1052	1541	1175	1073	1022	2334
1186	746	181	813	98	259
213	192	673	155	345	194
174	140	1136	219	1400	173
305	177	912	139	277	138
202	502	3457	272	3069	537
547	719	265	92	225	542
401	1057	245	135	96	1176
681	115	109	691	87	87
859	864	269	418	319	1577
579	162	522	187	304	256
282	724	218	203	173	1274
1288	261	82	151	93	86
417	248	775	407	1232	389
4144	513	607	9546	446	662
560	419	307	356	141	443
1741	117	352	3390	335	177
201	194	194	115	137	309
674	211	637	488	372	268
658	325	392	262	507	248
1327	644	696	1264	427	1271
285	182	1269	94	1955	178
5848	144	771	11854	544	173
787	215	391	490	342	197
367	415	272	418	274	723
201	985	507	197	659	1181
565	1455	235	847	242	2174
450	871	1329	188	871	1379
310	366	87	92	82	338
1059	74	1293	1130	2937	82
580	1296	287	517	123	1375
238	2436	616	204	146	2127
147	221	545	108	474	165
595	524	564	425	563	907
1002	168	559	408	641	315
260	465	1972	266	1958	214
462	423	437	375	189	108
220	219	178	95	90	382
264	368	125	104	94	148
195	297	177	125	233	358
119	238	1596	80	806	339
228	1569	439	176	109	3020
346	258	237	308	171	86
519	418	131	88	81	622
388	260	307	163	183	267
338	422	441	165	124	93
1008	162	229	1213	151	184
445	1121	656	242	840	417
367	222	431	84	192	251
443	253	290	399	241	315
2650	159	164	3644	97	148
194	219	298	198	311	186
697	713	399	1437	327	1005
366	424	185	228	173	706
1642	1011	202	1197	135	2279
650	338	410	439	246	328
390	272	326	411	123	349
231	166	174	271	124	197
549	163	280	470	108	90
1173	708	661	2325	393	186
669	312	130	360	92	170
347	510	217	147	162	896
1382	479	319	906	393	281
502	124	291	604	240	111
5819	201	568	7024	825	134
581	202	277	188	187	125
231	230	642	117	322	203
2384	226	202	4585	120	199
360	1038	1189	152	1376	1290
1212	227	741	960	527	336
792	1095	344	807	148	1833
5063	207	291	7828	114	101
1846	416	191	749	119	320
625	224	232	795	188	256
334	239	680	317	644	204
294	131	2353	318	2160	107
1769	172	2026	1934	1520	186
261	181	312	375	304	114
319	255	626	124	234	328
128	193	5040	155	3486	232
549	260	395	218	336	93
507	254	276	717	189	124
783	396	434	306	363	720
708	277	616	256	271	271
791	541	661	1444	519	1020
1045	292	451	2308	687	247
874	296	692	1162	321	339
447	278	165	374	98	155
203	206	162	102	103	341
580	2027	466	418	298	3584
166	162	206	107	93	173
2695	115	371	3367	417	118
182	265	708	98	436	179
460	345	405	349	305	327
491	178	104	295	87	183
442	321	416	714	231	303
383	337	172	107	80	480
4058	322	402	7952	390	301
2163	629	1333	4313	2182	781
3106	288	812	10714	1096	262
334	284	792	276	1220	156
316	214	586	380	492	84
1437	489	263	1057	154	485
310	203	1053	81	828	187
273	304	424	201	91	362
264	730	397	169	145	1349
1429	1891	92	3009	89	3494
947	212	189	1065	103	335
950	286	723	249	679	201
719	173	231	1185	125	84
252	221	1359	293	1176	349
945	158	168	1105	116	166
720	104	363	894	282	104
390	287	394	425	371	341
510	393	344	801	129	536
148	198	1286	94	1339	302
1315	753	267	1547	226	558
1015	336	1217	1198	1828	158
456	1940	205	156	179	594
840	248	460	1348	596	233
952	325	728	485	643	210
858	126	259	992	224	149
410	574	757	115	363	355
1030	947	170	1454	163	1493
298	391	292	81	231	154
351	1356	111	276	87	2149
2023	792	479	3555	314	826
408	165	262	620	177	130
1622	558	805	3404	835	493
354	513	238	515	95	208
754	213	2384	431	4889	259
723	486	269	1123	369	189
307	256	110	360	103	389
221	719	536	224	385	563
189	352	879	398	1076	110
451	938	440	737	394	328
2059	538	332	695	431	461
523	526	533	224	543	778
857	328	399	938	698	88
581	1021	960	748	405	953
320	941	269	134	323	1080
490	466	1196	558	1955	274
569	374	364	884	202	657
342	357	447	348	217	350
192	461	335	233	140	652
165	1795	255	162	230	1438
484	231	1088	635	2226	292
206	366	196	136	157	278
402	329	180	269	104	98
276	99	373	542	297	94
411	345	322	471	247	339
10220	482	460	14696	663	532
567	181	1053	322	1080	150
2662	325	565	4440	559	388
366	198	188	466	143	85
375	719	674	146	1157	1236
110	163	473	88	444	238
1071	615	204	1229	86	811
326	360	342	215	108	157
472	384	1304	596	858	184
160	144	194	94	163	92
210	156	182	120	110	192
262	669	297	255	178	784
518	128	523	755	631	159
614	327	209	848	149	239
483	163	404	371	114	98
280	420	713	205	965	523
322	403	1122	463	1622	639
673	84	237	1310	133	106
353	561	492	441	205	295
811	1413	131	365	98	1509
1793	376	170	1326	128	126
325	156	286	402	219	159
749	154	541	617	446	113
360	170	706	397	1090	235
239	642	316	269	239	237
946	390	210	1248	121	426
2227	304	329	3670	80	151
371	201	837	485	539	142
486	142	346	848	330	104
1202	747	137	1840	126	956
133	497	1606	93	2067	667
821	125	582	265	607	182
1771	383	116	3884	95	441
541	311	253	332	297	176
3156	158	382	6709	169	104
704	520	113	693	100	441
397	2692	971	474	1009	3084
915	187	327	375	206	169
357	189	386	441	517	117
1161	172	282	2204	105	211
553	3341	448	978	337	5191
978	359	559	1694	473	314
1875	575	359	3457	227	192
497	317	649	230	250	268
507	171	431	769	576	206
293	179	269	171	206	136
4306	200	386	3761	257	213
397	979	318	212	255	1554
366	775	1632	107	2456	677
136	175	189	140	115	148
3318	254	146	3195	229	318
712	180	1089	535	721	154
490	1388	751	478	751	1410
938	270	1002	1170	2199	334
1689	1010	284	3824	183	689
366	124	183	368	115	152
604	195	389	967	413	135
340	459	206	507	201	418
243	172	168	184	150	115
376	227	1191	353	2375	180
136	313	715	167	1032	341
1471	192	435	1389	305	212
298	575	1303	300	687	492
342	93	473	327	517	80
819	334	454	530	306	429
184	402	220	111	146	393
213	180	220	136	217	246
432	331	176	285	167	367
1336	280	562	2554	548	255
636	620	1576	893	2256	351
642	213	624	808	502	220
290	196	598	560	817	142
178	291	343	284	252	267
589	251	284	977	328	207
1062	161	1512	1890	2446	96
583	1291	832	188	715	710
626	435	133	1101	95	523
2279	259	300	3709	128	277
1397	401	480	2806	378	163
321	208	234	110	271	99
848	816	534	575	541	306
1056	537	296	668	219	467
198	218	1098	288	1230	106
265	441	1023	238	864	346
797	405	324	1108	450	82
674	437	1968	513	2305	154
2096	314	1038	4934	1042	134
608	334	548	1001	533	135
207	323	253	207	143	152
753	364	1122	1220	1903	302
288	212	394	337	355	95
240	279	331	299	128	381
1581	1195	890	2366	1383	2447
503	262	145	109	152	367
346	829	1579	122	2039	1462
3464	277	141	3598	168	158
1118	826	1160	787	1985	1350
134	164	303	161	116	133
534	162	1600	585	2760	202
362	433	533	391	798	868
541	191	191	479	122	85
1020	474	603	1327	430	136
1002	2946	409	1376	117	8091
204	1385	283	208	230	2290
522	254	547	683	608	415
271	156	1692	387	1303	172
137	127	576	292	460	121
234	149	1435	124	1534	126
255	1880	263	198	109	2536
503	399	198	677	149	625
341	279	390	346	103	401
367	184	685	405	1021	166
1420	452	715	3106	787	935
797	1125	257	956	224	1917
636	125	379	379	572	132
264	751	373	246	334	419
792	2070	746	604	220	2973
179	418	172	134	106	663
541	1078	262	566	93	618
323	153	779	384	879	225
1680	1410	433	2705	183	2436
644	300	357	934	293	253
456	175	167	795	153	152
787	138	1401	619	959	134
976	427	713	364	788	290
900	576	581	1346	856	1009
489	299	164	149	174	184
669	462	395	554	496	670
187	149	1067	378	1715	174
711	559	236	657	113	272
157	335	262	104	265	410
1226	246	130	2873	88	155
493	742	269	88	95	286
246	245	436	371	113	342
320	155	109	589	115	158
307	164	170	447	125	155
254	294	105	278	82	138
934	291	361	1313	216	134
251	383	651	458	877	601
156	913	452	141	403	296
438	903	843	80	1833	1880
1742	227	219	2057	151	326
196	186	201	272	176	138
195	1149	687	91	579	1498
138	900	770	125	635	1634
243	136	265	356	138	79
515	322	397	1067	288	117
571	236	452	1004	714	272
321	224	220	581	159	391
218	341	184	120	113	168
159	451	222	149	143	353
798	310	255	201	265	141
189	462	605	338	435	555
907	167	507	512	361	216
1532	658	211	786	223	841
964	453	322	985	153	339
444	1033	169	296	100	809
711	204	2503	763	3647	194
1031	763	301	2351	114	1637
546	436	507	107	429	299
1123	1034	146	1081	81	859
991	425	251	181	102	358
481	208	169	269	117	331
611	305	617	733	541	446
220	485	960	182	1260	683
378	1606	583	221	326	3072
367	539	493	754	137	745
643	1464	828	544	659	2079
254	246	196	249	96	162
2111	402	1741	1736	1347	703
388	2066	294	207	138	3059
840	503	478	602	559	666
467	1229	149	655	80	1985
125	782	410	90	364	985
419	116	514	822	290	130
1094	266	340	1609	295	243
967	1569	222	929	119	1995
381	342	1409	180	1478	108
691	353	245	780	249	342
417	696	1037	167	1908	1474
465	273	209	204	203	267
522	247	391	704	341	152
1280	656	308	2693	227	161
159	166	421	85	138	208
619	767	1113	383	1377	438
414	420	520	472	350	410
1374	134	622	2515	604	116
141	1376	226	115	144	720
114	198	502	131	359	102
463	336	253	710	265	209
554	891	386	922	164	2183
241	529	157	249	212	808
1320	391	350	1559	184	120
402	488	1320	134	1421	828
308	193	394	91	372	131
169	1915	186	271	84	2087
217	589	192	253	140	620
432	906	328	272	281	1058
1065	756	128	1355	103	1028
1490	568	173	2545	116	488
255	635	1434	119	1578	1100
403	596	283	612	277	392
891	193	371	524	353	119
269	428	288	405	111	356
147	895	618	197	391	1370
621	424	469	836	211	633
353	169	283	195	91	88
1024	552	192	2106	234	658
302	287	923	172	738	221
376	2362	381	451	155	4012
766	1294	246	1278	228	2643
1116	802	159	1972	169	1494
1103	402	3217	2243	3868	624
885	866	216	924	155	869
999	215	273	1077	263	128
552	504	243	399	174	820
865	680	1177	1196	2203	1133
97	314	179	98	198	335
872	280	262	1471	164	257
1061	266	611	1178	474	101
1467	382	206	2523	94	403
94	188	230	106	242	330
613	335	164	660	88	334
155	318	1850	90	2105	427
550	210	222	252	188	214
4716	299	238	6128	110	325
214	610	112	111	108	635
3191	278	165	4812	176	566
228	241	210	257	84	100
1229	403	131	775	107	335
822	695	261	1328	130	1043
494	238	143	569	137	293
574	324	292	314	241	449
727	559	366	907	557	660
220	1907	1455	333	1483	4030
212	1217	442	169	491	2166
270	336	672	150	801	520
568	410	882	658	767	166
1083	377	220	1341	185	666
143	127	315	147	81	96
726	522	999	441	1028	581
720	159	499	1169	354	231
287	527	239	122	141	454
1382	931	569	1693	568	1757
710	183	223	646	219	164
520	212	327	638	396	145
1030	179	510	605	563	203
321	233	5932	318	7444	158
1283	324	220	507	101	283
563	141	242	1060	241	209
277	362	374	362	426	491
291	1571	385	288	434	2247
503	952	181	117	118	320
2575	547	230	2063	172	519
897	361	1246	1459	913	238
305	172	1190	322	981	191
176	1266	360	307	408	1495
636	341	437	871	366	419
365	3245	2359	464	2067	6966
2128	185	199	2903	126	116
680	192	651	1024	1016	179
491	492	616	597	263	807
175	407	308	229	134	374
233	458	1218	81	776	835
833	626	1212	787	1210	1193
417	1060	213	535	168	1385
217	844	222	182	270	2219
273	1489	337	380	387	1508
199	473	560	183	479	538
335	132	762	548	402	169
277	912	325	139	167	275
1081	2069	776	1099	367	3779
313	373	171	87	194	409
154	494	389	199	169	619
327	514	456	265	481	616
2513	3447	301	1479	212	5814
565	614	1060	1011	981	879
358	496	615	729	290	781
130	265	410	79	134	546
507	1155	579	148	134	638
623	564	284	420	117	759
296	464	477	323	471	374
3857	138	569	6698	759	91
2198	837	223	3453	121	978
779	238	135	706	79	95
1107	817	316	2063	232	1081
374	155	236	306	167	225
5633	656	792	4191	752	1482
816	608	400	125	95	720
574	474	2603	358	2172	548
240	232	279	253	275	321
660	166	502	226	655	159
1845	133	206	3021	161	159
676	467	652	1233	445	453
393	563	504	97	303	1291
533	198	431	972	376	188
395	1216	302	516	197	2271
1158	424	235	2241	172	126
3216	460	296	3385	107	333
1547	269	335	1606	280	192
635	292	180	398	195	239
424	658	725	288	674	431
379	289	241	289	168	451
498	195	125	127	102	135
670	1222	231	313	154	1579
336	518	346	127	82	422
271	971	181	169	157	1477
783	1270	514	1389	525	1388
588	1210	294	453	333	562
1453	201	583	1415	846	127
641	351	182	970	255	361
1860	449	273	2372	224	350
393	626	472	645	477	80
3586	861	511	7299	654	811
2189	524	211	2134	107	418
613	713	439	492	517	841
1768	512	204	3039	195	824
249	3185	402	330	140	4624
742	2085	630	351	721	4757
708	986	360	1331	254	1794
1047	923	189	1530	206	1632
433	652	283	203	202	1156
542	651	418	646	235	1126
15380	337	607	47872	655	414
261	119	339	346	153	136
750	1695	178	1976	88	1003
481	1120	120	93	96	742
686	219	369	354	550	159
1170	150	471	2220	732	235
1789	789	176	2987	146	1962
407	384	253	97	253	239
205	234	805	213	766	248
730	275	155	442	152	82
186	368	303	225	97	297
809	158	2954	1275	3287	184
142	337	106	200	95	96
617	610	468	970	420	675
670	416	170	283	302	444
581	903	574	1219	480	1138
284	385	1053	156	1134	94
640	544	855	1136	1218	801
352	205	564	127	691	102
950	217	357	1525	301	155
370	346	605	113	427	300
906	147	413	681	448	225
371	238	483	101	334	329
245	134	642	125	771	98
712	1091	374	419	473	287
1408	129	373	2207	81	121
2519	246	405	3223	573	154
413	195	408	217	156	110
247	204	318	87	358	243
840	2154	231	1377	215	927
444	1090	339	704	345	1525
265	588	483	506	153	360
1215	1607	281	1021	287	2969
1811	746	351	1738	128	173
395	162	1725	477	1537	164
327	478	684	221	621	156
467	301	108	666	144	288
1279	364	744	4360	763	169
112	1476	182	107	109	879
2307	3104	214	5371	272	5909
584	1882	348	578	484	3271
591	224	709	490	964	168
186	219	430	268	371	280
259	542	311	202	148	421
259	328	695	115	570	143
196	1751	206	164	207	3151
248	262	214	186	240	119
159	1100	1162	105	1898	341
99	377	173	101	183	543
326	368	634	541	1025	184
300	665	330	494	392	730
1251	291	175	2229	117	408
1179	1245	466	1664	422	1936
620	382	1172	1008	1320	153
464	341	983	182	1062	198
249	279	304	223	244	252
331	840	349	325	405	526
600	429	146	838	126	144
742	664	207	974	88	1040
610	1420	267	861	184	1204
355	392	418	122	408	171
639	938	462	1017	555	555
157	666	565	117	595	278
180	488	266	274	223	483
483	423	835	196	544	115
604	1750	591	921	781	3202
324	164	364	174	419	127
731	568	190	397	168	540
606	740	1156	223	929	272
453	2282	253	457	208	7085
666	240	689	1164	554	176
253	541	520	337	558	151
491	990	186	749	199	1986
594	260	130	260	109	293
2061	422	151	3242	103	411
2100	211	183	2183	116	190
980	939	141	1358	93	1046
405	418	588	389	641	128
1533	595	336	2095	403	774
1194	480	183	2077	169	779
489	879	5161	616	5950	274
1879	464	196	5022	177	649
426	248	145	551	166	235
547	95	160	433	124	122
686	280	713	914	590	252
553	1178	219	573	251	1487
910	400	342	475	255	617
287	457	202	400	152	711
596	150	294	1145	334	116
690	155	418	188	686	133
133	326	273	151	254	261
128	746	160	113	104	608
716	174	502	584	807	218
466	240	379	681	483	289
546	1950	244	257	265	4771
700	492	242	1389	310	888
719	185	262	694	264	229
1053	730	264	1407	252	809
325	155	110	367	88	202
625	289	253	301	102	379
397	128	150	94	117	136
622	560	495	644	1108	838
239	2829	401	82	217	4431
1050	151	130	1603	139	204
1187	311	165	1868	175	285
682	252	232	756	227	364
339	157	248	306	183	213
830	506	558	320	1262	568
681	182	125	560	81	290
1349	157	322	2128	406	176
451	151	1906	299	2147	81
604	953	435	162	447	1151
1445	2321	1204	1582	767	1103
839	431	293	1572	152	343
247	1272	338	106	452	2199
836	653	703	1060	1143	1341
384	265	206	275	170	334
944	213	962	1124	1278	262
703	199	416	276	574	379
329	2638	344	150	368	4597
544	504	88	330	80	823
362	328	162	477	169	399
1302	847	137	632	111	1150
570	572	346	90	134	591
1199	271	239	1134	242	185
417	323	176	297	139	453
287	270	293	282	168	243
310	782	224	169	131	138
878	218	320	361	165	347
345	1443	165	87	189	1189
448	197	251	144	213	335
285	247	223	160	245	459
226	302	153	177	158	165
290	1504	164	99	185	3922
322	316	688	80	1173	174
2070	147	156	1281	179	82
396	649	100	187	80	460
616	153	116	201	156	83
575	247	194	798	174	418
254	194	638	255	881	140
564	606	227	310	148	844
353	1934	422	171	461	3493
1017	222	726	328	494	296
636	331	81	1020	83	362
301	275	1716	107	2647	272
2089	1331	414	659	446	1465
303	320	398	195	625	432
226	1233	232	139	215	1630
769	655	303	1459	340	519
521	597	649	1049	640	684
386	404	497	276	573	414
1626	465	1000	2800	690	278
286	1756	788	82	1184	1317
745	440	565	458	432	332
917	298	423	761	361	89
482	203	413	391	294	140
232	129	186	347	111	92
314	232	330	314	346	226
956	304	398	824	507	137
656	460	172	1300	237	658
738	179	289	517	130	148
594	339	581	179	670	322
496	1041	286	296	205	1640
457	605	307	661	257	876
133	284	851	176	624	87
498	880	387	246	249	470
1119	182	541	1830	390	235
484	1567	786	680	1440	2069
243	406	949	80	1009	169
229	446	203	125	102	772
682	166	285	318	202	144
1141	936	269	1528	346	1661
93	173	1089	88	1083	212
342	393	144	478	114	932
562	209	230	1254	80	296
678	138	393	898	629	131
941	888	130	624	102	1423
435	370	391	266	383	385
1136	786	556	1353	556	1364
705	286	1083	374	871	460
394	388	326	561	399	480
745	654	512	1303	606	1257
896	443	306	197	110	221
643	268	335	195	343	287
201	822	350	121	656	1080
611	183	918	780	1539	217
2783	210	367	3852	215	146
289	997	299	557	285	1182
313	207	292	496	301	170
934	142	1665	2338	3573	193
732	168	95	512	87	170
262	463	350	122	352	271
298	173	113	151	87	207
147	469	323	84	354	457
329	331	619	146	1032	345
420	520	284	266	420	278
89	1127	387	84	349	1797
1224	457	917	1018	978	256
463	1387	274	858	315	2256
557	218	239	149	353	149
1367	144	301	2356	230	129
712	172	296	1269	454	144
345	280	312	908	161	337
1649	399	601	883	309	693
1839	1421	146	2400	212	2824
1596	319	240	2985	304	353
630	449	1159	750	1454	484
880	666	211	939	295	929
636	456	342	754	510	219
343	792	362	257	95	549
677	839	209	777	174	1342
236	348	167	429	234	98
211	555	429	320	510	221
430	127	380	197	324	123
912	160	315	1034	336	230
285	1120	229	97	133	1437
521	410	1506	924	1902	471
463	376	850	361	1089	164
189	648	540	84	892	814
1016	482	521	1448	880	704
2745	752	503	5898	1065	581
1426	1343	196	743	246	1602
496	332	132	193	111	285
423	718	1342	533	3047	309
1712	348	306	2665	456	218
306	533	547	195	985	501
579	872	343	825	408	1727
211	504	132	239	157	803
440	516	104	317	100	180
595	244	913	843	654	331
613	807	227	1144	250	1323
1656	359	210	3618	344	444
169	294	318	150	199	218
342	375	93	83	115	576
517	243	156	858	154	192
402	263	178	599	138	439
274	522	271	81	286	132
361	236	127	554	87	279
376	760	130	457	108	1297
574	290	616	491	763	396
622	509	243	519	80	129
512	215	485	837	557	320
450	193	671	530	1082	183
391	805	256	155	203	971
134	265	479	178	630	296
274	190	464	258	510	194
213	156	147	198	150	175
662	358	315	1119	481	446
635	168	307	1428	83	120
100	294	355	113	297	377
804	202	330	1398	532	268
478	204	282	672	198	281
619	213	374	619	297	96
193	1200	244	200	215	2529
335	186	136	580	107	198
2024	287	248	3146	296	376
999	2162	94	1278	106	4175
1195	1382	275	1696	279	1547
128	432	139	111	118	832
650	727	246	265	168	261
873	624	149	1472	84	835
296	205	191	175	217	185
1469	178	1328	2734	1602	163
1272	606	641	1354	444	860
208	146	472	342	615	149
427	178	305	978	182	121
758	184	92	889	93	249
254	283	418	376	472	380
2499	381	462	5534	631	196
441	153	130	768	86	146
383	297	248	615	277	217
443	200	187	406	323	294
326	340	622	92	691	283
417	511	142	271	114	124
652	355	368	570	490	134
987	1074	157	370	165	1897
844	877	99	418	100	1439
355	341	282	506	424	354
147	509	149	198	100	82
1669	2371	139	4005	113	4707
2069	209	212	3327	277	124
324	978	201	623	204	1480
203	455	220	386	216	641
957	1494	214	367	189	2182
569	651	814	482	1429	760
256	335	316	144	445	476
380	766	162	582	273	1489
822	940	912	758	624	554
248	242	334	421	352	228
659	596	1801	834	2944	319
542	400	194	304	104	142
278	475	360	283	233	803
1153	316	151	998	136	301
1042	1218	765	1109	813	1849
3255	425	320	1828	305	457
461	1265	249	310	463	1676
289	857	187	339	151	1471
1457	1421	613	3951	843	2848
355	477	217	132	184	703
591	694	468	146	608	737
256	346	182	343	112	107
1011	531	301	476	378	637
302	673	181	330	169	1076
143	336	193	139	151	366
681	1115	213	1319	154	594
332	2092	496	494	581	4466
3852	274	230	10415	283	97
641	289	112	1426	111	484
343	752	372	107	298	783
682	208	934	336	1162	93
1032	383	103	2264	122	216
954	420	698	297	998	512
789	441	414	983	189	584
376	1338	408	185	629	1817
490	511	206	238	310	877
617	127	1125	332	1365	110
1825	162	337	3265	259	94
284	190	1125	118	1816	102
650	403	695	924	1170	158
265	317	366	98	370	167
225	384	157	92	153	173
236	388	225	211	82	119
876	1128	603	1291	898	1587
560	338	270	168	344	226
671	423	152	902	117	334
397	783	1406	102	2112	1301
128	1931	354	171	192	3118
537	296	677	440	693	193
917	280	239	1209	295	156
369	221	204	371	282	387
2478	206	401	4495	479	196
225	1133	231	250	330	2398
765	240	193	1541	174	370
937	814	468	669	229	1427
450	254	1421	466	2570	158
1275	359	245	968	230	120
196	792	484	302	165	1331
366	127	203	542	190	135
722	150	202	1116	216	203
269	413	472	149	583	851
836	167	310	243	310	90
355	429	813	533	1145	381
300	418	124	551	165	148
1644	2830	1438	2943	1067	7757
293	1318	129	287	144	2232
914	249	281	1088	229	403
340	144	740	168	1182	177
651	123	453	754	606	121
101	143	244	139	141	120
119	1817	656	81	1007	2464
670	360	355	1463	171	612
337	257	479	344	811	388
1130	167	1025	2315	1172	165
1182	451	251	1511	241	890
1091	1093	140	2231	236	1843
230	136	87	217	91	130
138	1878	123	153	155	2971
166	395	343	167	410	633
520	1388	1937	239	3730	2335
173	230	266	88	236	246
428	123	440	491	810	127
153	158	7029	150	12594	152
379	400	263	496	222	292
346	552	302	414	265	970
959	301	199	1589	248	170
842	455	190	1522	122	640
215	137	98	273	80	163
733	482	214	684	291	276
569	362	263	576	290	375
432	174	228	785	250	158
347	701	168	312	157	295
2025	145	268	2165	445	150
309	239	208	169	202	318
110	158	139	133	116	141
472	278	148	245	142	124
112	887	209	139	382	417
805	180	135	1200	190	227
255	268	207	329	153	143
224	376	142	272	143	584
911	866	166	1161	116	1796
528	228	87	431	102	316
471	196	99	543	114	125
896	1133	113	640	149	1500
1953	936	1074	3191	1884	1560
348	138	350	97	413	80
353	292	315	628	380	125
653	204	801	247	1648	261
2124	338	178	2273	242	153
120	292	345	85	325	145
283	380	421	100	487	298
1760	451	184	1326	224	534
465	152	1046	219	1629	199
726	634	182	581	150	787
118	430	175	126	126	339
369	755	159	219	200	1556
217	1265	221	173	170	968
327	208	355	84	400	309
617	293	121	80	142	438
670	418	222	135	224	338
248	498	132	81	107	649
759	1556	215	572	256	2927
621	1374	129	241	105	2018
482	523	206	492	192	720
920	218	217	957	136	163
451	393	189	595	173	674
303	2065	200	449	171	2915
1624	487	82	1174	89	661
282	1215	742	177	1179	1900
410	756	170	110	192	931
803	113	143	824	90	123
481	252	351	195	378	250
358	1533	305	89	311	1951
117	321	426	132	526	112
874	342	179	442	268	338
818	682	589	650	800	1438
187	266	179	300	314	262
101	587	184	98	163	401
779	162	268	518	289	197
625	1208	105	956	136	417
1167	409	115	1451	171	408
712	1717	585	132	895	1206
223	141	137	179	148	106
124	186	803	132	1059	98
2589	872	257	3625	169	2132
1024	528	220	2484	281	780
389	604	276	794	252	799
244	440	409	455	387	97
911	1961	2132	536	4159	1997
287	564	239	243	231	591
111	873	330	136	367	1016
814	542	931	470	766	469
648	730	380	326	197	992
569	619	176	771	237	1080
378	582	111	83	98	395
342	186	116	301	86	122
353	830	331	639	815	1327
2252	407	1482	4061	2361	605
373	543	267	446	480	616
767	280	411	1396	332	212
440	2088	639	203	622	3893
509	1245	2782	549	3146	2584
276	797	292	309	368	1430
376	425	186	260	208	590
573	822	112	498	102	859
162	433	102	183	115	453
118	220	94	85	100	123
2006	663	133	3420	207	1083
1861	507	407	2699	696	789
293	263	236	103	344	258
820	248	169	726	114	93
235	361	258	142	336	405
266	178	186	123	173	316
249	326	472	340	923	322
208	305	102	98	116	407
428	298	160	793	156	309
192	200	109	167	117	215
224	256	234	307	142	547
248	230	178	123	224	88
815	333	772	434	1312	335
3238	694	199	4743	233	1026
791	532	329	1060	487	650
354	329	216	264	256	436
437	241	526	269	393	287
665	2080	157	496	179	4141
182	1205	116	199	162	2064
274	380	264	291	367	638
412	336	198	591	203	508
281	393	246	475	201	141
520	484	248	949	139	563
1350	118	389	1196	903	95
227	848	178	106	148	1684
849	159	216	1053	173	225
184	176	145	210	165	161
419	212	446	280	575	134
365	170	226	432	249	193
1032	231	279	1204	356	145
625	132	337	187	416	203
114	461	1843	81	3023	528
153	311	981	102	1140	269
2585	345	289	5061	372	462
733	1504	109	1192	155	2173
1262	932	763	1798	1083	305
1044	163	192	1414	83	180
394	1188	256	404	247	1428
326	331	184	189	128	395
134	169	701	83	717	107
118	182	1463	107	2159	172
348	601	1880	226	3851	1140
541	401	171	93	141	355
367	479	131	616	150	778
201	469	120	129	93	794
201	1064	140	187	136	1310
877	852	189	867	231	2115
390	1496	1927	787	2533	1459
1150	388	517	3403	785	525
423	129	138	208	104	155
284	2092	118	238	173	3583
451	467	138	341	108	588
438	564	260	506	503	851
236	386	360	314	422	380
200	505	251	135	169	573
216	3380	431	143	191	5377
517	497	110	198	118	749
1139	276	421	987	560	514
2492	1225	91	3909	80	1399
622	1177	281	1012	334	611
350	570	314	235	132	722
258	453	800	173	538	355
441	140	169	156	249	82
533	825	320	598	477	943
4358	225	169	8449	144	89
478	752	164	977	184	1053
2312	573	157	2107	168	696
460	460	306	544	484	526
248	154	122	240	136	220
947	677	177	798	177	1414
520	219	348	574	570	305
1434	173	130	2090	120	143
252	134	1363	173	2546	146
305	1078	277	409	449	836
330	456	225	306	266	431
2218	186	208	2392	189	178
297	133	421	209	550	82
357	552	364	279	446	1243
494	1563	160	470	93	2195
316	371	316	341	536	102
278	436	200	507	277	315
385	492	223	435	121	344
889	247	82	2012	85	187
248	1188	460	206	719	1508
595	712	126	469	113	400
193	280	1876	93	5013	420
193	1206	610	229	609	1130
2457	514	313	3671	344	396
153	963	1297	96	2348	1407
309	1320	692	493	755	1299
285	1115	173	264	204	522
206	339	328	201	326	357
322	927	168	357	157	772
436	460	97	284	100	801
170	290	167	157	191	334
258	976	304	155	227	1706
1060	2332	803	2402	1505	4458
347	3357	1149	178	1601	4428
187	673	157	160	137	1091
393	917	146	404	157	1581
813	653	279	1716	260	1066
288	318	113	212	99	392
1213	120	121	2566	139	128
609	1174	136	442	165	684
675	236	105	678	81	131
368	155	143	267	189	218
533	792	121	610	119	1884
462	695	169	715	235	451
512	233	255	552	299	235
350	386	159	523	230	224
202	416	223	256	189	187
275	382	105	299	91	260
459	326	254	216	229	90
302	246	688	492	514	164
442	439	225	789	243	404
197	248	247	106	389	94
479	202	371	729	440	107
1505	324	486	1819	104	118
109	157	202	82	184	217
6376	112	223	13974	236	91
4559	244	309	6336	348	307
476	137	393	213	128	105
1146	156	394	1880	458	104
193	614	90	104	89	283
523	560	289	226	268	343
194	733	292	173	382	405
534	785	391	318	289	1158
939	2048	124	1369	103	3606
225	2745	153	166	157	4421
275	140	338	351	251	156
2711	338	331	5575	434	289
304	546	218	462	285	457
480	260	195	80	225	315
348	179	264	697	288	124
372	158	122	392	132	221
494	313	84	849	82	236
1210	2083	228	969	327	3579
249	344	516	440	504	263
2330	1065	233	4616	217	1547
296	240	525	175	709	135
1907	181	201	3424	144	182
519	669	497	283	633	932
1370	225	252	1159	220	272
780	158	371	1270	404	164
216	279	156	342	166	208
807	189	161	1250	182	184
805	1911	146	1120	120	3121
916	783	242	1823	279	1092
657	573	164	1266	179	734
740	245	227	214	255	360
720	195	127	908	119	168
130	823	161	99	200	1856
989	436	397	1313	621	305
486	220	113	105	152	103
1626	432	1192	2391	1397	389
559	472	255	304	155	679
248	224	355	100	433	110
1017	841	421	2130	612	1375
142	204	114	271	79	207
576	376	228	289	272	207
221	233	554	123	594	296
846	321	147	1010	166	196
233	408	197	395	119	514
1134	642	122	2143	113	484
493	260	140	993	92	353
952	183	99	2462	101	157
850	116	351	487	472	123
2388	165	187	5273	186	87
142	410	193	81	198	546
1028	768	189	1539	267	1379
1121	81	128	598	141	80
1662	771	422	3177	574	1708
401	476	203	743	161	729
766	341	164	1282	167	435
129	475	275	109	399	742
255	173	810	340	1402	173
626	210	170	334	262	262
800	2553	152	584	165	5943
559	114	182	688	100	104
1725	564	1684	2977	2838	181
669	171	279	1106	244	195
1133	271	141	1630	130	248
504	1914	626	482	798	2514
1450	834	168	2437	168	933
585	1290	240	499	429	1948
183	143	573	79	751	116
2440	374	202	3695	177	750
565	176	270	927	348	181
117	206	175	108	139	260
335	846	177	674	154	1025
219	339	417	102	547	383
3714	239	169	7149	99	392
342	412	437	417	546	216
603	238	103	595	93	174
692	380	207	906	282	447
346	1218	233	391	145	1765
373	761	98	582	111	1250
1209	471	181	717	210	623
1074	191	123	1863	143	215
552	1059	877	614	1148	1703
331	957	408	174	274	1574
383	299	354	361	279	236
383	253	631	341	868	114
351	627	375	329	168	792
381	1192	374	330	607	2063
386	938	184	206	275	1974
220	516	310	90	237	285
285	1006	327	91	348	1395
1947	274	1119	3903	1745	111
594	3772	149	353	154	9401
1021	403	136	1861	115	159
218	864	1327	258	2017	1187
228	1393	251	219	308	1634
233	480	579	255	872	382
357	264	221	474	80	221
362	1110	617	462	643	2116
307	990	394	433	172	742
518	838	240	472	352	1684
145	211	247	141	265	83
283	909	353	432	448	542
469	346	187	524	282	437
461	294	1336	454	2391	118
218	277	173	197	149	163
631	636	225	952	221	689
216	515	219	174	327	697
1084	1127	283	2812	401	1931
374	546	435	371	150	737
268	448	198	79	201	130
1215	237	196	1642	180	170
956	891	418	1152	570	1040
432	233	195	570	210	308
892	510	120	919	153	309
300	685	292	429	300	581
1029	1246	898	1865	1086	1204
441	472	111	497	141	598
657	130	705	1151	1150	88
1647	488	431	2193	579	413
913	280	622	1581	958	121
482	716	205	825	234	703
145	476	461	137	797	606
401	158	236	575	239	136
448	418	324	832	364	407
427	267	120	652	156	211
251	1659	76	327	94	1337
367	177	429	116	754	146
604	113	198	689	216	82
2955	330	1908	5848	3658	160
158	237	255	87	265	80
644	162	121	568	134	243
1003	105	178	1039	122	96
394	305	189	279	247	318
146	104	266	89	213	128
620	332	232	1108	242	309
259	370	249	195	280	595
827	399	208	1511	285	100
1034	231	142	2029	160	202
573	236	257	1193	446	334
249	912	191	373	361	2104
356	1843	130	237	103	2596
405	232	197	905	202	311
293	372	143	392	136	346
379	560	227	449	229	1056
279	253	145	453	130	257
92	592	389	101	513	831
499	302	101	412	120	477
2341	808	282	2894	373	1328
227	237	1042	206	1843	343
2714	260	135	4104	138	294
449	337	170	606	228	545
534	190	132	847	110	121
450	921	733	588	1593	1853
2189	284	310	2044	306	248
551	216	172	315	214	282
303	151	238	100	214	204
609	354	401	311	486	547
621	2309	135	145	186	1684
382	186	225	431	125	146
1353	234	110	917	137	147
238	257	184	200	111	232
434	620	210	908	204	1201
654	554	186	1892	243	733
554	395	354	464	386	255
479	178	191	673	188	155
631	146	111	614	111	144
650	364	164	736	174	546
1666	535	140	1227	93	902
362	198	184	129	180	204
513	142	77	185	89	190
771	191	208	795	131	133
553	1222	710	591	1169	2659
588	738	161	251	197	492
268	158	280	105	311	115
645	329	536	102	751	383
277	554	177	277	246	884
406	1057	132	277	90	1531
290	1250	411	102	505	1650
973	113	139	1141	205	167
787	1313	350	405	355	2287
764	660	168	517	158	739
523	187	1177	93	1636	306
242	180	100	93	126	149
955	1222	569	173	822	2336
900	480	272	1268	267	964
334	299	126	248	146	447
386	613	810	171	1001	226
4576	291	854	7256	1555	382
415	357	211	731	274	645
6201	295	2012	13173	3860	231
2763	197	257	7346	152	86
1851	327	367	1280	185	315
441	529	255	182	246	746
1636	921	273	2012	370	431
158	284	834	94	767	332
1447	3663	235	831	220	4009
969	3265	1445	592	2228	8718
438	404	112	273	89	658
4908	519	300	5693	791	691
450	513	674	174	588	505
343	262	290	384	358	165
490	601	94	172	111	572
1454	304	94	3083	99	630
359	607	185	459	201	677
233	202	112	344	101	135
572	253	131	324	139	191
2926	836	254	1496	95	980
635	528	121	239	203	806
914	866	376	1477	683	764
238	479	228	107	348	817
1006	466	560	1669	556	654
415	1137	167	98	101	593
2442	253	525	4994	689	84
903	770	183	1209	172	904
324	1406	246	344	321	2660
204	110	97	396	115	117
878	461	177	1903	208	733
357	273	493	223	899	265
323	203	165	349	150	94
937	208	219	1236	138	225
841	212	193	634	219	181
205	2794	741	248	1246	3528
315	1077	295	93	477	1803
2113	798	499	1640	367	1018
365	513	195	87	256	107
809	815	188	815	186	1038
971	87	147	1007	179	91
1214	672	945	1488	2171	1130
281	992	225	160	218	1641
177	1040	241	253	357	468
576	806	253	603	162	1009
373	1169	372	557	882	2317
532	384	169	664	148	554
3062	374	252	4625	131	440
372	919	139	542	162	1527
444	155	96	181	92	202
1120	450	430	1179	571	415
991	383	187	583	253	116
284	288	294	299	405	150
396	111	979	121	1071	134
404	359	287	365	347	192
841	653	1822	1257	2974	910
433	642	269	353	373	1173
1039	389	699	1892	1062	524
345	1034	730	108	674	607
887	916	1387	791	2046	1202
2971	344	163	6138	137	147
610	844	132	531	154	775
221	261	1877	149	3800	214
134	7873	134	118	107	12449
577	220	161	522	232	486
670	1136	124	684	81	2438
1055	339	510	759	754	324
511	298	1888	755	2528	413
1326	389	147	1632	123	600
6376	345	117	6668	104	413
1679	812	248	3204	476	918
871	293	346	973	415	376
312	974	190	241	211	1571
175	2503	401	175	519	4646
1037	358	415	1409	184	450
272	731	297	108	129	1283
470	538	305	700	458	619
369	450	273	318	336	401
853	244	124	1022	111	242
978	222	298	1379	457	365
353	471	156	276	181	149
1603	991	762	1279	520	1814
320	271	112	583	130	354
1016	3596	166	1817	166	7990
727	2211	179	866	136	2159
520	172	154	1076	175	249
376	132	261	160	420	195
205	386	220	298	256	389
1905	175	122	3079	119	138
707	383	1352	614	2501	260
338	277	388	158	528	261
1044	420	216	1483	339	763
412	416	397	385	438	216
449	1582	193	247	271	2808
941	357	78	940	80	196
3539	905	301	7382	523	587
2037	142	1792	3698	4692	134
232	512	588	131	584	533
653	455	1198	428	2213	620
153	1968	132	83	108	715
822	431	171	287	192	322
631	283	324	741	335	421
373	164	726	86	1180	146
3519	146	173	7019	147	145
749	297	312	1474	315	373
580	577	681	480	744	286
244	179	94	101	101	125
4734	1082	161	10658	183	776
464	146	1092	146	1531	93
329	465	379	201	348	328
1008	1895	817	606	1465	4033
1531	989	156	1330	136	425
576	272	103	416	91	341
300	824	124	118	130	899
326	1507	152	534	153	816
453	681	122	123	166	671
2112	451	134	4638	188	372
898	709	118	640	120	1260
378	264	159	402	235	207
405	665	196	139	198	226
942	702	215	301	365	80
254	748	259	102	300	912
334	2179	157	120	229	3605
154	225	319	128	428	341
440	223	102	157	89	449
261	243	203	372	230	250
187	250	225	79	233	111
553	758	208	916	176	567
429	210	110	580	100	225
223	1136	190	346	79	1607
398	355	255	330	149	412
269	387	366	305	160	98
963	259	178	1950	113	421
1707	502	428	2581	304	588
281	805	235	285	260	409
2938	343	460	5692	218	495
322	1323	281	141	200	1494
1690	482	244	1180	208	1142
2169	459	472	4256	315	832
2552	773	193	3214	128	1367
660	274	117	1258	82	116
957	125	371	1597	219	186
3035	486	449	4100	290	828
1051	937	199	407	121	783
894	376	260	1073	201	150
379	1705	231	93	224	2520
444	443	277	91	209	348
294	336	192	128	102	288
292	181	445	277	445	199
1006	447	292	1629	187	794
454	127	283	98	211	113
226	521	123	80	104	938
803	246	182	1363	153	138
865	677	260	841	170	467
611	524	147	169	115	637
234	1132	446	327	233	2314
986	593	624	399	1085	843
219	202	334	360	162	172
1184	245	194	2461	215	277
787	706	199	432	295	1281
1438	266	823	2336	892	298
323	273	347	571	370	340
398	115	198	416	118	87
254	152	109	208	93	305
555	305	393	808	351	289
178	545	583	301	878	622
861	136	190	894	193	83
282	728	439	197	387	831
1464	379	525	2580	453	441
388	722	105	136	84	873
317	430	196	231	170	248
9742	571	193	10243	216	703
194	458	496	174	182	344
261	429	1340	97	2042	502
301	482	320	157	192	561
559	223	856	151	553	80
2269	665	107	5931	112	671
624	1598	135	1235	181	2944
949	2351	497	1639	625	1907
1661	346	581	2655	714	466
1136	271	130	1711	166	95
613	4137	219	199	168	6617
957	271	396	1185	296	372
3681	241	262	3152	306	427
2289	767	810	4591	1504	1593
847	311	162	382	167	552
457	829	142	878	134	1068
850	172	957	1287	1090	233
2378	225	335	1693	415	290
386	1643	242	342	159	1735
1348	423	194	1179	122	743
167	467	282	112	79	555
831	1075	157	1932	151	1141
421	356	612	541	607	236
347	224	679	535	643	296
265	386	147	170	123	297
359	833	271	155	178	1470
133	575	168	144	173	945
367	873	1342	316	1757	593
2802	207	207	6274	127	330
1853	249	294	2973	235	96
447	623	385	477	399	723
555	576	192	174	213	726
557	1468	175	493	164	2747
414	3315	532	452	262	4023
230	351	264	165	341	417
695	795	319	1162	288	1064
317	300	138	458	79	183
123	180	353	107	471	319
226	2353	194	347	147	1479
256	106	435	151	194	111
448	1683	523	268	756	2714
541	200	248	450	92	205
2622	720	139	2114	114	1294
233	243	162	140	162	114
357	875	175	357	158	403
175	1732	468	155	333	2827
521	463	276	250	276	619
597	1812	334	1245	156	2210
183	330	101	147	80	117
509	611	180	238	233	894
210	495	291	299	193	93
381	629	1239	643	1431	1078
199	147	157	131	119	140
662	300	903	855	392	233
444	382	121	530	104	559
262	361	527	164	792	454
1958	811	221	3287	189	1696
2891	171	1639	4375	2365	192
331	254	126	403	112	227
221	244	643	176	609	155
581	1063	210	563	389	2143
256	534	139	90	147	225
593	248	101	275	101	173
474	1065	655	596	986	1915
2096	263	232	2100	215	175
412	205	818	340	707	205
1246	1873	487	1818	330	3365
480	484	293	470	224	689
1762	415	302	1517	116	516
695	208	190	814	98	212
788	193	802	1520	989	292
569	2987	218	409	246	3928
1660	249	217	2592	272	248
646	668	346	930	245	1533
180	528	115	153	83	683
283	1356	154	411	104	2475
887	187	351	450	482	197
300	846	396	87	492	1659
267	1530	246	102	94	3039
347	932	622	403	603	1779
930	288	433	1977	743	257
737	1175	160	1078	88	760
206	168	597	170	734	119
299	440	209	420	194	441
111	174	199	100	283	197
392	298	127	674	135	270
1779	549	147	1474	202	288
801	127	177	510	138	123
181	201	249	139	150	247
434	304	1609	474	2116	185
506	211	102	754	92	191
1069	451	1277	1617	1186	780
1391	323	783	1793	1009	449
195	408	104	150	98	483
266	628	228	86	211	728
411	148	1005	675	1587	136
882	276	169	1508	170	241
239	463	196	223	196	530
196	932	564	310	763	1800
746	163	196	649	315	99
676	320	405	920	269	219
399	202	241	163	110	132
226	126	174	328	79	151
542	785	134	442	104	1057
943	198	221	1569	271	206
1090	164	128	2083	105	138
2092	948	266	1475	272	1680
114	145	182	120	141	126
204	594	267	255	349	217
142	604	430	109	247	857
450	578	861	576	1007	726
266	499	777	487	844	763
322	516	929	314	1188	795
797	1856	812	759	528	3512
1249	286	137	837	111	201
190	229	366	147	292	114
524	522	220	690	196	878
328	215	1609	371	4337	213
372	986	289	338	359	1900
260	160	257	88	250	185
260	126	712	209	356	165
208	220	191	257	211	165
546	945	217	372	107	1611
191	351	261	136	97	220
1458	549	390	2685	471	134
666	899	217	342	156	1422
475	214	865	471	1131	270
403	324	334	228	229	167
210	221	241	87	269	79
809	295	178	264	153	337
424	442	219	168	287	796
2016	328	168	1016	170	365
664	798	108	372	98	1302
622	1157	207	199	83	1560
698	162	351	137	427	341
1149	128	192	1430	180	106
364	773	390	484	353	1264
449	161	275	731	240	128
218	717	223	294	292	791
595	164	198	712	93	93
316	468	511	294	493	787
340	136	109	230	79	169
666	655	389	467	484	1038
171	391	193	128	170	658
205	284	120	87	113	171
612	144	195	353	275	170
143	264	830	149	1216	358
163	1316	121	166	180	2571
469	278	120	984	114	302
421	336	1218	648	1551	288
1384	108	291	1584	247	172
442	572	127	539	114	953
262	300	183	248	184	595
746	431	750	475	1001	600
869	117	407	1141	190	129
192	254	475	119	791	108
176	2367	348	186	356	6018
1197	335	150	1405	150	224
461	417	190	424	151	297
311	169	152	510	150	176
302	448	167	100	203	713
293	277	228	121	310	464
9055	522	461	16911	334	521
935	178	407	1393	419	158
575	291	314	849	190	382
369	185	204	292	173	204
246	127	601	381	859	175
516	589	234	752	140	727
2363	259	383	2458	459	217
432	211	492	285	422	333
948	204	147	2234	153	365
395	149	398	268	413	268
960	76	302	987	384	88
328	542	1034	453	1384	438
622	234	972	1092	1301	412
316	3342	370	714	412	4896
635	248	273	490	296	156
239	352	1293	225	2236	655
778	148	275	916	307	138
367	758	147	177	159	1530
466	449	565	607	670	622
903	1261	114	520	177	1736
520	225	119	760	140	94
1059	240	1501	1502	1350	228
609	808	546	748	614	1299
190	140	285	189	142	153
1118	270	541	2554	345	202
503	186	383	662	448	195
410	373	276	682	450	565
408	154	175	439	213	121
142	150	386	103	713	132
164	634	152	115	178	955
319	117	853	119	1985	111
244	739	419	231	394	642
1436	529	133	1359	97	700
470	238	297	360	315	412
348	768	1220	277	1494	1321
893	319	253	1292	226	183
175	215	324	242	153	162
213	757	229	227	186	809
336	342	418	581	617	199
1525	1115	522	2321	302	2264
118	1404	346	197	420	987
244	325	742	100	825	441
271	550	136	369	222	727
623	201	144	760	180	191
157	303	247	104	189	358
992	215	411	1938	119	195
364	342	274	422	110	555
979	362	692	2082	783	317
840	295	219	1023	407	115
751	1354	354	1172	134	1508
1030	331	167	1831	190	194
383	348	212	451	207	542
920	1108	139	828	206	2249
832	1255	660	1107	861	1723
92	528	2174	87	4121	632
1005	1631	278	1172	351	1338
810	1095	251	1353	240	1413
495	548	240	247	269	784
559	359	311	620	255	230
160	179	755	126	846	133
92	1129	168	92	91	1872
4457	168	133	5434	89	144
1024	321	438	763	850	288
3044	430	1418	4438	2044	355
359	1006	942	235	1133	1096
228	627	307	233	218	908
804	272	376	1208	411	226
208	117	178	152	270	121
487	540	429	643	561	673
523	887	119	520	82	536
645	497	471	857	576	489
188	232	138	167	111	219
258	1584	214	302	336	432
467	461	356	127	444	283
646	609	117	1091	173	873
563	381	232	331	203	236
430	572	176	676	184	1121
412	331	217	396	292	360
376	242	542	99	542	350
594	701	377	615	461	832
1322	449	163	1532	150	709
347	365	108	131	118	151
281	275	362	98	444	342
264	313	184	309	221	329
557	175	81	578	82	183
1265	259	145	577	133	291
1069	360	832	574	1519	134
515	230	363	275	371	105
[truncated: 799 more rows]

## Sheet: Figure 6c
G-ratio
Wt-Dox	Tg-Dox	Tg-DoxR
0.685055	0.55685	0.327143
0.310462	0.560063	0.321873
0.556721	0.426826	0.733699
0.370615	0.397325	0.440657
0.386132	0.551353	0.680505
0.62685	0.661381	0.585149
0.52317	0.4725	0.601434
0.318242	0.335686	0.409248
0.550058	0.369066	0.511483
0.339227	0.49076	0.432855
0.770425	0.56711	0.653548
0.704921	0.591935	0.398811
0.75732	0.571728	0.39543
0.576478	0.353309	0.358436
0.514673	0.650316	0.691496
0.544427	0.74288	0.359844
0.635951	0.2949	0.307317
0.561866	0.433385	0.417267
0.516665	0.365036	0.5
0.422097	0.507928	0.62854
0.608934	0.423854	0.4281
0.610896	0.414538	0.791276
0.517755	0.406105	0.795733
0.766003	0.503247	0.29564
0.442522	0.205052	0.697441
0.526303	0.366146	0.291752
0.614779	0.470905	0.76599
0.771855	0.644993	0.403886
0.7209	0.5	0.557112
0.656633	0.5041	0.281124
0.551451	0.470152	0.363615
0.594889	0.565617	0.292375
0.411158	0.668212	0.289152
0.607465	0.54814	0.606553
0.451093	0.81024	0.684135
0.690722	0.436029	0.440503
0.562066	0.685347	0.424831
0.533242	0.446573	0.563234
0.584785	0.647854	0.364018
0.680052	0.460688	0.60029
0.575252	0.369104	0.786557
0.441996	0.375552	0.553879
0.800748	0.528667	0.594216
0.780674	0.506	0.567431
0.658174	0.697314	0.611342
0.617572	0.702368	0.620768
0.487978	0.744887	0.617355
0.559279	0.413019	0.554935
0.518037	0.657593	0.67149
0.769552	0.419052	0.500847
0.559767	0.629243	0.490815
0.697623	0.428381	0.80907
0.72295	0.432234	0.535284
0.642696	0.314045	0.55158
0.767092	0.694085	0.452672
0.629734	0.69507	0.408217
0.449675	0.37094	0.391217
0.808566	0.801843	0.637355
0.516077	0.408302	0.381908
0.496005	0.633229	0.498061
0.387412	0.495165	0.373442
0.782468	0.433404	0.338953
0.561532	0.418857	0.368996
0.467865	0.467148	0.429928
0.634469	0.744935	0.666616
0.661991	0.518745	0.413295
0.605885	0.391994	0.811173
0.672301	0.669196	0.341207
0.703867	0.609199	0.428861
0.615484	0.577389	0.711054
0.629358	0.669768	0.34022
0.829322	0.440944	0.33658
0.766292	0.555024	0.373664
0.784888	0.587098	0.599961
0.731284	0.507632	0.5
0.738712	0.477018	0.415435
0.773018	0.642986	0.45656
0.667226	0.706627	0.602364
0.672488	0.540352	0.758809
0.808607	0.649592	0.437215
0.467115	0.426437	0.591453
0.472413	0.392634	0.594949
0.661054	0.640996	0.554206
0.52793	0.560237	0.584196
0.712681	0.41089	0.387497
0.451167	0.48459	0.439433
0.717543	0.66697	0.562655
0.584252	0.47222	0.656285
0.663663	0.482796	0.351038
0.720432	0.605332	0.680323
0.614787	0.527585	0.773961
0.748	0.435584	0.707768
0.696514	0.561787	0.42533
0.752093	0.39612	0.631653
0.764306	0.769091	0.617344
0.569578	0.643141	0.5
0.71342	0.627499	0.29143
0.637227	0.546567	0.597447
0.706576	0.630626	0.689643
0.691291	0.404916	0.751453
0.68357	0.575122	0.337651
0.76047	0.786355	0.409265
0.402647	0.558561	0.370531
0.738355	0.678212	0.335417
0.44294	0.59014	0.693168
0.534131	0.708005	0.492736
0.717304	0.5	0.359837
0.716353	0.704676	0.42557
0.590475	0.652965	0.509266
0.708231	0.414142	0.342868
0.74131	0.464604	0.300835
0.747223	0.429653	0.392199
0.419437	0.494161	0.33721
0.578118	0.568779	0.77847
0.726128	0.386856	0.527538
0.714375	0.403425	0.418305
0.699965	0.571904	0.689985
0.540963	0.746584	0.798843
0.491498	0.525697	0.732217
0.74413	0.588296	0.594681
0.685385	0.375455	0.661282
0.48087	0.534959	0.519113
0.479927	0.726676	0.58145
0.788751	0.449979	0.405226
0.698877	0.376128	0.716504
0.846962	0.696947	0.413532
0.517884	0.381616	0.612854
0.443704	0.520143	0.372858
0.479871	0.46698	0.735514
0.783955	0.4628	0.364545
0.670284	0.538115	0.708562
0.673442	0.474476	0.685194
0.680028	0.546695	0.613135
0.659789	0.635637	0.701742
0.726254	0.566639	0.443908
0.741622	0.406824	0.401907
0.795812	0.520301	0.643634
0.52203	0.670189	0.481422
0.664391	0.392689	0.483602
0.658284	0.377606	0.378189
0.600565	0.412068	0.403228
0.801913	0.611368	0.398099
0.686513	0.790868	0.643743
0.64509	0.710595	0.358191
0.63706	0.436702	0.5
0.505092	0.699336	0.723858
0.761007	0.618585	0.687413
0.515062	0.587565	0.753136
0.546972	0.45995	0.556755
0.738785	0.774646	0.557811
0.678814	0.559414	0.528918
0.694944	0.648337	0.5
0.621084	0.335598	0.436471
0.710171	0.391149	0.685962
0.698682	0.682041	0.501579
0.714242	0.732307	0.482224
0.670133	0.419336	0.470054
0.436699	0.406193	0.498241
0.568406	0.43641	0.641589
0.545407	0.617618	0.660214
0.741777	0.411372	0.598893
0.541879	0.75348	0.50551
0.720677	0.648384	0.596475
0.478915	0.549443	0.498291
0.714567	0.604162	0.673743
0.647471	0.316935	0.494452
0.607014	0.617599	0.524301
0.72922	0.676128	0.785649
0.637659	0.435488	0.651105
0.512355	0.607065	0.695531
0.694847	0.674406	0.688468
0.800184	0.484561	0.511692
0.70701	0.347468	0.429368
0.785139	0.480113	0.686718
0.482267	0.587588	0.739107
0.69181	0.535919	0.595605
0.639881	0.557191	0.608486
0.719088	0.580348	0.656662
0.662143	0.300687	0.5599
0.729529	0.673786	0.57543
0.609933	0.595635	0.449224
0.773929	0.446201	0.762064
0.655535	0.458255	0.536359
0.589777	0.451217	0.744733
0.529168	0.654854	0.449398
0.728872	0.384092	0.627613
0.494623	0.469591	0.657135
0.503012	0.63281	0.588609
0.80705	0.357973	0.586994
0.746198	0.448987	0.69962
0.466884	0.37115	0.561792
0.718753	0.464656	0.438586
0.444937	0.430149	0.648355
0.575721	0.56038	0.658113
0.377733	0.379227	0.627969
0.479458	0.514546	0.385883
0.71886	0.422284	0.804506
0.689617	0.421903	0.419884
0.796526	0.696044	0.637684
0.610267	0.751373	0.400812
0.719762	0.5	0.674171
0.756437	0.551166	0.5
0.764082	0.44786	0.321272
0.503295	0.419264	0.469713
0.624505	0.708203	0.531945
0.545068	0.457361	0.410398
0.609651	0.458168	0.402127
0.736057	0.38805	0.778691
0.576494	0.637874	0.732363
0.615592	0.386892	0.768425
0.736517	0.382739	0.375232
0.688435	0.455957	0.404622
0.721675	0.701358	0.337482
0.529838	0.401458	0.544047
0.424718	0.699704	0.357585
0.75786	0.43397	0.750006
0.584068	0.644134	0.613214
0.609048	0.664254	0.40732
0.778457	0.431583	0.618249
0.681206	0.39939	0.489788
0.632696	0.467148	0.474291
0.578077	0.491095	0.356841
0.741701	0.625101	0.422779
0.60321	0.419271	0.702892
0.553024	0.449091	0.448964
0.525741	0.623794	0.778678
0.800716	0.6723	0.512994
0.404144	0.719913	0.635574
0.677818	0.381352	0.419639
0.665067	0.392745	0.798073
0.711948	0.434841	0.660458
0.530676	0.634041	0.655233
0.781659	0.43708	0.555506
0.475699	0.560971	0.430434
0.541166	0.574239	0.661402
0.68985	0.546688	0.66192
0.659999	0.640098	0.354848
0.532494	0.396449	0.691549
0.50287	0.372454	0.643103
0.649072	0.726675	0.51466
0.740544	0.589829	0.393548
0.493372	0.517571	0.414294
0.369167	0.415455	0.436737
0.729821	0.68186	0.504233
0.83533	0.361429	0.363824
0.567101	0.604999	0.403867
0.579504	0.452053	0.402803
0.719422	0.326764	0.748968
0.746249	0.366237	0.480639
0.709258	0.404369	0.609957
0.71856	0.474667	0.393907
0.655264	0.425787	0.569419
0.683297	0.481855	0.55052
0.593247	0.552342	0.800796
0.540349	0.654338	0.764542
0.559826	0.583545	0.644462
0.4278	0.50467	0.573501
0.640235	0.427556	0.363927
0.756472	0.404656	0.52925
0.517967	0.471329	0.611715
0.70818	0.445505	0.452816
0.74883	0.620499	0.667807
0.759412	0.384619	0.65437
0.655679	0.443041	0.684294
0.631186	0.375849	0.585022
0.714067	0.445155	0.46757
0.687558	0.448911	0.356377
0.54103	0.443631	0.662295
0.596129	0.625887	0.605302
0.632214	0.400954	0.357681
0.695871	0.628773	0.324223
0.740481	0.459395	0.539869
0.656544	0.72032	0.699473
0.714738	0.544581	0.449503
0.670175	0.629112	0.690274
0.743675	0.643331	0.357695
0.467888	0.614872	0.239328
0.686125	0.534438	0.6331
0.524325	0.594974	0.678081
0.678424	0.609269	0.674039
0.441848	0.509633	0.720133
0.513065	0.684841	0.40887
0.42578	0.408099	0.571929
0.689159	0.409415	0.41602
0.740885	0.481452	0.601797
0.395943	0.647031	0.342607
0.754967	0.572989	0.642928
0.791937	0.58175	0.5
0.707618	0.37327	0.629433
0.614501	0.434311	0.671263
0.782564	0.605534	0.420983
0.704136	0.636273	0.587794
0.805752	0.585574	0.775471
0.504142	0.547314	0.657734
0.690994	0.504061	0.703047
0.388686	0.497671	0.5
0.655475	0.628348	0.38735
0.624041	0.77457	0.710193
0.679039	0.513668	0.421769
0.70631	0.656483	0.351978
0.747071	0.589125	0.413843
0.707233	0.461669	0.393618
0.642927	0.735594	0.522171
0.573043	0.385933	0.496355
0.75017	0.3931	0.620301
0.70438	0.406414	0.716326
0.684024	0.451026	0.823376
0.770577	0.404121	0.614415
0.706095	0.469351	0.46178
0.720399	0.38954	0.620905
0.662647	0.721638	0.5
0.686638	0.488447	0.38102
0.657566	0.51336	0.379159
0.75169	0.383217	0.6631
0.538786	0.4728	0.792155
0.752454	0.479275	0.68013
0.646624	0.741032	0.614436
0.431789	0.435949	0.501906
0.658898	0.473988	0.658988
0.613923	0.587326	0.782516
0.625862	0.601814	0.626957
0.650969	0.709205	0.412574
0.57948	0.423926	0.677018
0.648686	0.638496	0.486207
0.590192	0.43764	0.610987
0.514955	0.472975	0.453995
0.429977	0.654934	0.768042
0.716458	0.405665	0.59277
0.699039	0.407303	0.366765
0.612667	0.644127	0.676353
0.754992	0.417632	0.702942
0.735863	0.41306	0.337466
0.67078	0.454265	0.474174
0.714854	0.487517	0.485425
0.642515	0.521892	0.405832
0.512482	0.368447	0.415225
0.60677	0.591007	0.399758
0.776321	0.369486	0.445415
0.735617	0.434924	0.437714
0.718775	0.46227	0.559316
0.648057	0.52686	0.441682
0.71124	0.706389	0.348955
0.445308	0.462923	0.842743
0.412398	0.584613	0.411049
0.749022	0.491793	0.5
0.605142	0.747903	0.421418
0.559022	0.490341	0.736071
0.6713	0.381184	0.365258
0.530757	0.460339	0.435797
0.600849	0.493995	0.386854
0.70809	0.420866	0.613705
0.639856	0.407297	0.72207
0.57846	0.733683	0.389363
0.591241	0.695501	0.653143
0.512454	0.45229	0.44453
0.621075	0.48131	0.412272
0.698372	0.651727	0.433641
0.539797	0.628319	0.348261
0.699398	0.361122	0.603443
0.31421	0.470986	0.337105
0.43041	0.610893	0.390654
0.678492	0.506173	0.709775
0.48793	0.558094	0.591511
0.44051	0.35597	0.778142
0.554218	0.403206	0.575768
0.210362	0.567864	0.375633
0.686679	0.555868	0.636776
0.805028	0.481544	0.462923
0.559767	0.357054	0.474146
0.785675	0.533629	0.5
0.593191	0.548916	0.581341
0.599497	0.551718	0.656547
0.48567	0.411658	0.45194
0.664704	0.642931	0.483871
0.522861	0.481941	0.491721
0.823226	0.407263	0.691755
0.58101	0.375029	0.658245
0.657045	0.417427	0.605138
0.662262	0.4778	0.510779
0.747484	0.475017	0.301088
0.525136	0.535438	0.412387
0.456884	0.451818	0.661342
0.714513	0.480289	0.492711
0.660354	0.509929	0.818505
0.656045	0.387631	0.477486
0.585351	0.548005	0.560833
0.651246	0.70459	0.670697
0.461696	0.501039	0.435743
0.671292	0.516766	0.645033
0.639309	0.683755	0.794149
0.525293	0.41233	0.46276
0.479628	0.408837	0.560532
0.586017	0.448188	0.594305
0.579334	0.635293	0.660485
0.622499	0.433823	0.465746
0.671057	0.603667	0.710085
0.324676	0.365536	0.52514
0.510948	0.520863	0.445792
0.561751	0.757192	0.778579
0.723413	0.689645	0.590779
0.607478	0.576533	0.624964
0.439078	0.50522	0.679441
0.65858	0.463306	0.59254
0.727657	0.516338	0.658092
0.670964	0.576034	0.697491
0.797477	0.557803	0.465681
0.613053	0.37461	0.453467
0.591302	0.559511	0.380663
0.583834	0.741699	0.403431
0.684964	0.476504	0.608509
0.692324	0.389448	0.5
0.678823	0.439103	0.667983
0.807304	0.453913	0.421745
0.578498	0.562241	0.409912
0.495351	0.717715	0.52694
0.572622	0.563463	0.64553
0.708328	0.427461	0.462528
0.713735	0.637738	0.5
0.449678	0.529865	0.686925
0.571086	0.573333	0.640525
0.814837	0.428754	0.572353
0.521436	0.605616	0.653169
0.640801	0.46585	0.401021
0.675816	0.482088	0.422789
0.78904	0.652141	0.495411
0.464385	0.60771	0.594449
0.712537	0.522469	0.791743
0.659341	0.71793	0.429445
0.673227	0.412301	0.463087
0.704664	0.405359	0.349998
0.717155	0.502574	0.512464
0.50966	0.537663	0.349438
0.679576	0.344029	0.63281
0.503808	0.655313	0.364388
0.699608	0.51389	0.5
0.473214	0.414684	0.387384
0.469085	0.62803	0.398619
0.796942	0.375993	0.426738
0.82466	0.543517	0.425663
0.735538	0.5	0.520066
0.602052	0.37109	0.522872
0.552233	0.575572	0.574376
0.600564	0.674281	0.464604
0.587889	0.495867	0.731601
0.734228	0.722511	0.431373
0.519904	0.386318	0.531797
0.611298	0.378462	0.748093
0.541071	0.544271	0.435827
0.746186	0.41192	0.352223
0.466936	0.491371	0.66236
0.807712	0.424416	0.391865
0.78814	0.423219	0.379393
0.882896	0.350661	0.339968
0.645107	0.423424	0.455101
0.686284	0.414537	0.536962
0.579766	0.631762	0.537434
0.412461	0.591658	0.312861
0.624671	0.572084	0.342396
0.566496	0.587969	0.760804
0.817764	0.438743	0.598836
0.674871	0.387373	0.652581
0.438858	0.40381	0.655733
0.766374	0.390922	0.385103
0.690236	0.363683	0.663158
0.730437	0.463996	0.452747
0.695919	0.6193	0.351597
0.691625	0.529567	0.335716
0.743958	0.652608	0.513973
0.595616	0.606107	0.499501
0.723277	0.551705	0.324941
0.691674	0.430362	0.622193
0.470438	0.667672	0.5
0.760894	0.588173	0.422958
0.54918	0.636427	0.404479
0.701656	0.633537	0.338581
0.427023	0.391205	0.461331
0.745767	0.535341	0.430078
0.450395	0.472994	0.633313
0.609862	0.5	0.664785
0.799677	0.660341	0.327362
0.731969	0.541471	0.607198
0.826737	0.639185	0.4946
0.716349	0.360854	0.371037
0.535942	0.395879	0.462673
0.743336	0.483317	0.353406
0.693122	0.512734	0.597328
0.648365	0.399908	0.499041
0.76863	0.46016	0.361238
0.745625	0.568913	0.379322
0.442482	0.64565	0.4963
0.522503	0.544308	0.403884
0.695288	0.390885	0.45963
0.727537	0.484629	0.5
0.480238	0.34817	0.610187
0.693739	0.654926	0.492528
0.749195	0.356195	0.438513
0.675791	0.411718	0.416743
0.67013	0.487609	0.374409
0.660943	0.624082	0.411939
0.714032	0.728969	0.520282
0.615626	0.465486	0.360778
0.639214	0.525264	0.442618
0.760727	0.641788	0.325521
0.673955	0.61662	0.427091
0.736186	0.347524	0.385989
0.547266	0.432	0.5
0.80418	0.542224	0.398179
0.709679	0.439115	0.5
0.525642	0.707402	0.419462
0.619998	0.459261	0.566954
0.704715	0.49076	0.5
0.624542	0.544876	0.524626
0.702595	0.561695	0.440153
0.559398	0.444623	0.310128
0.563002	0.462613	0.490874
0.676891	0.42387	0.44513
0.744618	0.619861	0.692699
0.699639	0.422464	0.590646
0.614274	0.395763	0.264447
0.631386	0.426497	0.633956
0.739225	0.623143	0.409977
0.802121	0.588069	0.699818
0.72545	0.38309	0.429601
0.529868	0.530443	0.659065
0.587877	0.636545	0.580092
0.696731	0.567624	0.507145
0.608621	0.542112	0.455097
0.66327	0.598465	0.422382
0.664176	0.526321	0.533543
0.724207	0.563237	0.61557
0.79196	0.698324	0.415752
0.710446	0.604441	0.546428
0.772775	0.382853	0.327308
0.749774	0.401234	0.622646
0.561708	0.549296	0.572916
0.456121	0.42384	0.738805
0.826967	0.50523	0.342265
0.609347	0.461673	0.630614
0.827268	0.633765	0.602515
0.622762	0.636383	0.372181
0.685646	0.46611	0.414912
0.485328	0.432566	0.438724
0.692831	0.600842	0.5
0.793766	0.519184	0.57316
0.782157	0.588184	0.522061
0.782835	0.613858	0.703397
0.802167	0.468089	0.413335
0.533636	0.411382	0.408506
0.722313	0.602017	0.600598
0.549097	0.419225	0.721715
0.610659	0.553763	0.621622
0.567105	0.505948	0.654673
0.40695	0.411107	0.384569
0.662097	0.532438	0.359395
0.628876	0.594823	0.555084
0.610993	0.635437	0.606688
0.646789	0.444862	0.374743
0.733108	0.403695	0.527357
0.827724	0.389477	0.336508
0.671386	0.5112	0.5
0.745552	0.56203	0.457076
0.737897	0.412764	0.5
0.615959	0.499628	0.428388
0.654771	0.576111	0.434447
0.657637	0.700584	0.349854
0.619076	0.374488	0.56376
0.67762	0.433195	0.428042
0.676787	0.383937	0.537093
0.591833	0.456562	0.657882
0.5996	0.568956	0.648061
0.601966	0.385551	0.377847
0.566825	0.328269	0.580176
0.81284	0.367198	0.649184
0.725636	0.601078	0.5
0.714401	0.723716	0.436413
0.765142	0.436995	0.626161
0.729159	0.553223	0.373665
0.762725	0.621861	0.555498
0.775963	0.599647	0.604762
0.444798	0.667069	0.616081
0.770551	0.486711	0.555516
0.784083	0.432917	0.446607
0.810763	0.462923	0.444336
0.530656	0.424973	0.643181
0.596693	0.40394	0.34538
0.562656	0.493035	0.726094
0.70852	0.565247	0.347753
0.646202	0.305916	0.455787
0.732649	0.395083	0.355296
0.600437	0.384324	0.429491
0.83537	0.657006	0.5
0.753417	0.574781	0.668118
0.639907	0.433945	0.448925
0.771639	0.472314	0.569075
0.681944	0.610224	0.40387
0.695329	0.544997	0.378078
0.74655	0.586571	0.597819
0.371344	0.635937	0.408334
0.486774	0.57829	0.428043
0.654744	0.374564	0.457768
0.548803	0.536996	0.459257
0.680909	0.638328	0.652534
0.668225	0.696643	0.56484
0.669708	0.300063	0.516099
0.611379	0.509872	0.681301
0.717481	0.53731	0.626646
0.707144	0.5031	0.506973
0.646637	0.69273	0.5
0.697425	0.722616	0.626254
0.721697	0.410819	0.5
0.757627	0.462923	0.398263
0.526067	0.573509	0.567191
0.618468	0.58285	0.374693
0.719221	0.640087	0.391568
0.672188	0.569293	0.364379
0.680527	0.438512	0.638421
0.80861	0.388702	0.449644
0.714351	0.448446	0.34699
0.623755	0.614131	0.692652
0.633347	0.585256	0.663447
0.621054	0.513711	0.438099
0.593902	0.422173	0.61056
0.636208	0.649186	0.554427
0.673612	0.456784	0.703938
0.790293	0.596813	0.351872
0.715742	0.40612	0.440478
0.770246	0.372403	0.672633
0.630826	0.504751	0.58601
0.378859	0.554744	0.754987
0.758888	0.352377	0.5
0.413387	0.389902	0.649407
0.621835	0.581801	0.525441
0.758047	0.446265	0.352662
0.656667	0.396228	0.475903
0.608765	0.385834	0.401722
0.833457	0.610199	0.611613
0.407433	0.42379	0.524711
0.726352	0.512897	0.5
0.768385	0.692465	0.597691
0.731214	0.573755	0.57094
0.688044	0.549947	0.366221
0.727908	0.55778	0.563786
0.764652	0.395506	0.464359
0.628029	0.378231	0.509933
0.391037	0.378663	0.565339
0.738756	0.475118	0.592033
0.707207	0.406066	0.5
0.533678	0.660557	0.704556
0.624437	0.551632	0.401756
0.73241	0.539312	0.446132
0.78529	0.439907	0.488167
0.76083	0.497402	0.680754
0.736112	0.400983	0.406878
0.592643	0.382342	0.552043
0.633139	0.469236	0.5
0.424688	0.461608	0.416492
0.727249	0.567507	0.424164
0.519214	0.5	0.435458
0.562827	0.55366	0.53997
0.644475	0.399532	0.639858
0.591911	0.5	0.682697
0.665093	0.591607	0.744239
0.827557	0.387124	0.430837
0.288981	0.590654	0.482019
0.643325	0.397445	0.435399
0.31424	0.405695	0.49429
0.616326	0.375728	0.447707
0.673692	0.607664	0.365243
0.636428	0.447341	0.703893
0.562679	0.546157	0.662123
0.787721	0.408893	0.35692
0.651667	0.494783	0.5
0.666598	0.374271	0.399518
0.603122	0.405006	0.65796
0.53991	0.434202	0.43183
0.566133	0.474092	0.345461
0.747117	0.450248	0.598487
0.598025	0.357866	0.667207
0.7817	0.613133	0.450347
0.768664	0.451425	0.545452
0.680067	0.442964	0.5
0.517827	0.390389	0.607278
0.724504	0.456066	0.563522
0.489307	0.364109	0.793486
0.55086	0.527802	0.363497
0.742967	0.265732	0.561227
0.823192	0.359214	0.521947
0.500395	0.388646	0.741193
0.576889	0.253802	0.740071
0.695619	0.652551	0.483317
0.801469	0.398678	0.388565
0.63216	0.552836	0.351526
0.675879	0.365583	0.395363
0.748908	0.384335	0.773766
0.74592	0.396505	0.645861
0.669041	0.355068	0.48736
0.700015	0.565384	0.419561
0.410218	0.372433	0.589904
0.40997	0.322239	0.519871
0.724778	0.539769	0.482665
0.693105	0.364632	0.426772
0.61653	0.513793	0.712073
0.726732	0.433466	0.635233
0.784495	0.484101	0.342745
0.558055	0.480035	0.5
0.722881	0.491075	0.590237
0.49962	0.502201	0.456182
0.739991	0.504099	0.603929
0.70594	0.471661	0.63982
0.72934	0.35804	0.378404
0.536886	0.487828	0.625543
0.798274	0.498613	0.347797
0.544711	0.363294	0.408814
0.671801	0.618514	0.469082
0.774751	0.38745	0.61769
0.782358	0.558255	0.718658
0.811208	0.501963	0.624669
0.632619	0.54406	0.454022
0.70961	0.54215	0.422811
0.600435	0.590153	0.561235
0.751306	0.612999	0.492126
0.657649	0.410206	0.610775
0.734261	0.408409	0.656548
0.719012	0.695307	0.639344
0.78941	0.510343	0.393474
0.660322	0.644214	0.411729
0.678563	0.369772	0.5
0.594462	0.348292	0.416003
0.518507	0.563376	0.616014
0.699268	0.391971	0.610648
0.530623	0.417269	0.316213
0.781189	0.615667	0.447586
0.672545	0.439151	0.645691
0.587288	0.46544	0.384845
0.780639	0.350253	0.438261
0.667839	0.552313	0.70998
0.518018	0.431241	0.65418
0.719679	0.48209	0.398326
0.723149	0.522202	0.584223
0.61525	0.586191	0.616472
0.58144	0.541283	0.5
0.712268	0.709236	0.484259
0.647505	0.592185	0.505839
0.668031	0.289612	0.422614
0.548083	0.518277	0.646187
0.766033	0.349507	0.675877
0.480161	0.500897	0.56347
0.742133	0.573034	0.343976
0.671276	0.505922	0.638587
0.704546	0.587567	0.441184
0.551135	0.38674	0.420335
0.664758	0.309274	0.613684
0.474026	0.335494	0.416833
0.784446	0.60411	0.308011
0.70828	0.64789	0.423335
0.666506	0.579328	0.368497
0.390436	0.644956	0.755508
0.625197	0.477547	0.518477
0.779347	0.559848	0.34245
0.667337	0.463578	0.689028
0.748264	0.306228	0.642901
0.717345	0.506092	0.437768
0.726863	0.670898	0.653772
0.756297	0.378624	0.768699
0.763866	0.336799	0.409979
0.735006	0.532894	0.643217
0.711433	0.397412	0.5
0.464679	0.393068	0.546099
0.659912	0.563818	0.493687
0.722196	0.505007	0.291223
0.642856	0.503093	0.563164
0.728358	0.516929	0.514962
0.645528	0.573867	0.747311
0.746976	0.632126	0.482563
0.559079	0.353529	0.467932
0.627095	0.633268	0.631733
0.460559	0.532581	0.576266
0.697114	0.516216	0.652822
0.638866	0.431551	0.504531
0.477565	0.51213	0.479675
0.781253	0.690138	0.44214
0.781643	0.466691	0.415605
0.574685	0.576142	0.566437
0.432079	0.400262	0.465774
0.554589	0.567493	0.709641
0.657927	0.549113	0.469324
0.826437	0.361252	0.464368
0.783844	0.335319	0.596422
0.685205	0.537484	0.579792
0.743143	0.617721	0.607083
0.649848	0.374038	0.335743
0.601796	0.317562	0.5
0.289183	0.515504	0.374732
0.549199	0.511557	0.377855
0.671645	0.494391	0.434662
0.440207	0.429445	0.643709
0.773923	0.38968	0.775009
0.787649	0.332027	0.451097
0.463858	0.554082	0.351556
0.77891	0.561649	0.491414
0.727641	0.705028	0.630442
0.803929	0.556901	0.456399
0.658792	0.599604	0.432546
0.663041	0.434841	0.590407
0.62018	0.51377	0.52972
0.583348	0.720545	0.66267
0.58645	0.500352	0.627545
0.430958	0.415814	0.647938
0.507747	0.470312	0.5
0.466076	0.426602	0.716732
0.561551	0.416488	0.361657
0.763563	0.377713	0.396843
0.626686	0.580181	0.5
0.68033	0.556172	0.62449
0.703743	0.514682	0.406404
0.738905	0.540594	0.423489
0.746956	0.440546	0.515696
0.830891	0.535034	0.800566
0.714055	0.56295	0.641186
0.581844	0.377804	0.66079
0.804185	0.570265	0.386767
0.707203	0.680144	0.432604
0.530577	0.507272	0.396584
0.789766	0.56325	0.317728
0.749489	0.433641	0.492672
0.527751	0.415428	0.691915
0.687451	0.495338	0.749437
0.894079	0.419752	0.400075
0.706866	0.688828	0.421057
0.834589	0.4765	0.375947
0.380722	0.490119	0.667604
0.519705	0.54973	0.4417
0.805956	0.752843	0.472841
0.78566	0.618224	0.367133
0.455328	0.607721	0.3427
0.64797	0.488753	0.424094
0.570998	0.405173	0.575803
0.682915	0.389636	0.341133
0.765484	0.398951	0.623144
0.691608	0.481348	0.481328
0.737255	0.363285	0.828052
0.470272	0.405484	0.618278
0.802454	0.570797	0.553929
0.534801	0.657995	0.692569
0.776223	0.527111	0.729874
0.466614	0.432651	0.369537
0.768494	0.526902	0.711469
0.486428	0.423478	0.665058
0.601967	0.590065	0.530429
0.425846	0.401823	0.577876
0.52584	0.552439	0.621515
0.552063	0.379039	0.388682
0.776898	0.462526	0.699892
0.778386	0.673171	0.563712
0.517197	0.376598	0.382463
0.492743	0.427899	0.435797
0.773343	0.393506	0.406922
0.736599	0.634367	0.618415
0.75424	0.575602	0.399835
0.638469	0.407887	0.583412
0.64396	0.519168	0.371856
0.708658	0.413213	0.368017
0.622437	0.490951	0.584656
0.724318	0.480968	0.462088
0.867866	0.364546	0.5
0.649042	0.507644	0.426169
0.83237	0.605814	0.428951
0.677616	0.362628	0.405683
0.609038	0.570458	0.439876
0.707375	0.672364	0.581129
0.618676	0.505706	0.726988
0.541772	0.618605	0.605694
0.645474	0.621792	0.506434
0.591885	0.575876	0.5
0.586242	0.413689	0.373588
0.651872	0.411263	0.65223
0.75238	0.473786	0.56816
0.754132	0.324787	0.438056
0.789107	0.63687	0.690427
0.752894	0.561753	0.442739
0.744787	0.552378	0.460347
0.479348	0.478618	0.645966
0.61509	0.551273	0.37301
0.662089	0.602537	0.565551
0.738679	0.424775	0.660397
0.750191	0.535628	0.468719
0.74441	0.67474	0.462922
0.484048	0.595008	0.585988
0.762567	0.362912	0.604664
0.610972	0.353235	0.5
0.727091	0.629699	0.489856
0.494002	0.40462	0.592017
0.759249	0.362491	0.357938
0.54408	0.449783	0.555407
0.577818	0.380319	0.5
0.470327	0.48151	0.580325
0.693016	0.60703	0.600769
0.78183	0.41654	0.582892
0.699503	0.460529	0.583729
0.752324	0.591958	0.712791
0.527655	0.494121	0.640211
0.781739	0.61439	0.465047
0.672158	0.455382	0.39499
0.735278	0.427586	0.757145
0.676364	0.537161	0.654004
0.766907	0.583259	0.425178
0.79345	0.541117	0.519735
0.70965	0.63136	0.604445
0.850457	0.754513	0.476478
0.716289	0.415757	0.741817
0.587601	0.350606	0.5
0.693226	0.653648	0.506938
0.682015	0.737297	0.632815
0.530642	0.388667	0.378278
0.718761	0.543883	0.54139
0.79476	0.373824	0.585304
0.416805	0.418772	0.423335
0.648499	0.5197	0.578048
0.626293	0.5	0.588522
0.602292	0.602293	0.362575
0.743263	0.782258	0.63411
0.574473	0.355532	0.680023
0.786013	0.528403	0.37526
0.615171	0.522109	0.512095
0.761355	0.5	0.736007
0.702226	0.323136	0.62173
0.572449	0.504059	0.665118
0.408152	0.548569	0.5
0.694121	0.570066	0.502544
0.455312	0.677386	0.485914
0.761052	0.354403	0.485017
0.776644	0.64453	0.411271
0.686162	0.655519	0.596093
0.629343	0.682463	0.651279
0.502549	0.605608	0.610302
0.66055	0.754662	0.678646
0.783409	0.458804	0.517361
0.611896	0.411892	0.370509
0.410231	0.399228	0.411639
0.703066	0.565835	0.522572
0.799727	0.477559	0.602369
0.535148	0.335336	0.367076
0.722527	0.268251	0.757962
0.588075	0.371558	0.533234
0.727922	0.362962	0.528442
0.479032	0.594466	0.405926
0.527832	0.595621	0.613285
0.561376	0.414197	0.636645
0.724784	0.475204	0.46886
0.501874	0.340467	0.44141
0.397461	0.415466	0.347198
0.665811	0.543463	0.5
0.635711	0.46536	0.518857
0.66909	0.393151	0.427162
0.585524	0.672797	0.696698
0.46048	0.670855	0.348265
0.453726	0.718331	0.431541
0.373436	0.596201	0.591711
0.594385	0.413019	0.656004
0.639954	0.392886	0.635405
0.498874	0.439059	0.446767
0.337744	0.648696	0.41567
0.553722	0.721186	0.599439
0.543764	0.502118	0.526219
0.424332	0.644743	0.679424
0.74459	0.51887	0.771796
0.616973	0.38343	0.735834
0.518185	0.791009	0.476463
0.51676	0.666587	0.770701
0.429866	0.628934	0.449193
0.770102	0.397724	0.352077
0.533846	0.581939	0.676435
0.306775	0.513631	0.603814
0.595934	0.456485	0.430831
0.554941	0.582524	0.696927
0.783374	0.496724	0.309707
0.79146	0.44015	0.316231
0.610692	0.500014	0.41529
0.777702	0.558856	0.424224
0.509258	0.388518	0.413233
0.625964	0.500781	0.501534
0.665385	0.636347	0.638006
0.647632	0.506836	0.373576
0.731815	0.54333	0.419154
0.675219	0.36085	0.365887
0.639087	0.4019	0.607791
0.790509	0.474401	0.541442
0.629571	0.334031	0.687536
0.439319	0.52301	0.598585
0.552753	0.598674	0.276724
0.700719	0.414538	0.417943
0.695452	0.659323	0.654933
0.540925	0.45116	0.600881
0.775061	0.638711	0.442353
0.714361	0.689514	0.627942
0.47358	0.491695	0.404195
0.572237	0.534419	0.689364
0.519354	0.65912	0.44916
0.738527	0.44502	0.5
0.635342	0.456921	0.514776
0.720303	0.68547	0.672643
0.806529	0.680992	0.472263
0.716593	0.569461	0.651158
0.609742	0.580167	0.476332
0.579771	0.557736	0.402416
0.727148	0.493627	0.769188
0.540699	0.51848	0.645788
0.708095	0.541467	0.360154
0.788839	0.409271	0.701695
0.380481	0.577947	0.677131
0.44818	0.563617	0.648369
0.560353	0.479227	0.464605
0.716352	0.390431	0.643162
0.748664	0.540632	0.645857
0.77358	0.463689	0.37057
0.741445	0.578326	0.621684
0.829836	0.390272	0.602792
0.633745	0.55736	0.432453
0.555174	0.63244	0.425672
0.57973	0.507199	0.47098
0.592166	0.586691	0.615418
0.531142	0.566875	0.32958
0.587126	0.374293	0.436474
0.63256	0.583679	0.627439
0.616898	0.708535	0.625505
0.787598	0.587427	0.675657
0.413704	0.712835	0.534577
0.794884	0.427859	0.406856
0.784472	0.471869	0.413077
0.810806	0.530682	0.462551
0.552412	0.666892	0.424155
0.744965	0.589652	0.841891
0.804774	0.71346	0.418799
0.705744	0.552083	0.351905
0.655668	0.690494	0.38825
0.693503	0.45015	0.723268
0.575299	0.732682	0.362747
0.700501	0.438281	0.5
0.759156	0.634677	0.634877
0.724606	0.507499	0.643923
0.517097	0.651047	0.740125
0.719657	0.416523	0.642916
0.476068	0.480006	0.729081
0.764473	0.521555	0.692234
0.59854	0.443615	0.521004
0.523742	0.557831	0.419975
0.74915	0.348852	0.369028
0.834707	0.347572	0.767729
0.523514	0.36803	0.478003
0.475187	0.387329	0.681671
0.723429	0.484947	0.46698
0.775944	0.352054	0.772673
0.571432	0.679704	0.541563
0.691663	0.599945	0.544234
0.680165	0.363511	0.412614
0.628741	0.54943	0.592992
0.751774	0.457123	0.485709
0.774487	0.495906	0.5
0.802746	0.443631	0.457881
0.62248	0.578449	0.631951
0.445944	0.61442	0.809752
0.77368	0.354594	0.5
0.724541	0.637861	0.613442
0.469946	0.637136	0.56027
0.728934	0.42033	0.446946
0.718572	0.503616	0.687925
0.669595	0.772743	0.602599
0.616773	0.350751	0.50301
0.758072	0.415433	0.746275
0.70455	0.710631	0.518527
0.449061	0.435769	0.521104
0.687061	0.426909	0.700718
0.642137	0.605091	0.704777
0.637788	0.347631	0.648891
0.732422	0.434553	0.574092
0.802948	0.570608	0.454236
0.652148	0.548335	0.387267
0.748637	0.697016	0.783494
0.733544	0.523512	0.634686
0.674457	0.699813	0.418686
0.666911	0.35293	0.440869
0.759188	0.654732	0.529727
0.78543	0.510279	0.581864
0.716465	0.410844	0.469504
0.763501	0.38368	0.597563
0.608318	0.59707	0.498071
0.502494	0.38514	0.642684
0.767483	0.373586	0.5
0.544822	0.37174	0.624111
0.775152	0.52706	0.442928
0.696931	0.57572	0.580333
0.732996	0.59845	0.413758
0.802762	0.456332	0.414198
0.711746	0.396686	0.54466
0.714483	0.668354	0.715825
0.828872	0.534427	0.422617
0.722511	0.543884	0.548392
0.723872	0.386885	0.612804
0.686424	0.391554	0.532554
0.445362	0.624428	0.465777
0.607074	0.571142	0.422488
0.610868	0.512946	0.745683
0.481442	0.606013	0.764622
0.534177	0.719564	0.597056
0.741392	0.349396	0.566687
0.693542	0.695612	0.593566
0.837548	0.593535	0.619868
0.79766	0.543157	0.363173
0.765882	0.369044	0.436546
0.754846	0.679983	0.450443
0.491732	0.555523	0.44279
0.641879	0.55954	0.610359
0.549483	0.573265	0.671038
0.745019	0.682519	0.77687
0.644869	0.487816	0.641916
0.749439	0.545068	0.589123
0.710189	0.530019	0.56242
0.541999	0.556122	0.444025
0.649538	0.393952	0.638137
0.622623	0.353952	0.664048
0.688828	0.528087	0.639741
0.511445	0.583906	0.448722
0.552131	0.419989	0.550661
0.654768	0.580545	0.750771
0.837671	0.644765	0.487002
0.456582	0.722762	0.498044
0.400074	0.428541	0.69886
0.697824	0.5	0.618083
0.479808	0.405124	0.706399
0.671509	0.701156	0.402502
0.652104	0.586543	0.518835
0.796983	0.435827	0.586572
0.728445	0.779572	0.626796
0.850925	0.317312	0.398767
0.810513	0.364291	0.678017
0.40463	0.286616	0.455394
0.537729	0.472717	0.409881
0.825352	0.354317	0.624622
0.409037	0.618892	0.731708
0.702878	0.303243	0.488343
0.553576	0.610363	0.416777
0.550071	0.561341	0.630291
0.557706	0.443574	0.404494
0.7823	0.401596	0.623971
0.496239	0.598571	0.674216
0.69565	0.370347	0.452624
0.518792	0.654271	0.3689
0.502754	0.491772	0.726754
0.622418	0.360366	0.653205
0.735366	0.298098	0.342515
0.411211	0.454235	0.449387
0.701123	0.667084	0.44653
0.418749	0.29108	0.5
0.695134	0.744552	0.366514
0.626468	0.484621	0.598973
0.752054	0.384722	0.393904
0.676096	0.73941	0.6468
0.793896	0.573336	0.37539
0.668942	0.715613	0.824347
0.800811	0.573424	0.378136
0.586566	0.602242	0.588243
0.686937	0.459395	0.411216
0.58686	0.434108	0.719338
0.715776	0.784775	0.410681
0.731699	0.622125	0.335986
0.754815	0.440174	0.645051
0.562754	0.430078	0.694537
0.418473	0.744079	0.825048
0.740055	0.388463	0.609737
0.759221	0.573238	0.630695
0.809793	0.658024	0.700833
0.668565	0.645463	0.467679
0.69033	0.592178	0.66869
0.521065	0.389541	0.390466
0.709998	0.63906	0.396809
0.695222	0.576729	0.641212
0.577258	0.714426	0.795868
0.799573	0.576277	0.748182
0.678046	0.568483	0.382552
0.812317	0.487583	0.662454
0.722213	0.680326	0.443474
0.809521	0.467557	0.547489
0.65392	0.3608	0.313451
0.633752	0.381401	0.323208
0.659696	0.668041	0.355218
0.498557	0.551111	0.521272
0.517019	0.617177	0.418301
0.69168	0.593728	0.5
0.653348	0.388742	0.709236
0.717777	0.535027	0.436252
0.661439	0.443908	0.528468
0.759903	0.322751	0.610364
0.789168	0.64988	0.61504
0.687432	0.420807	0.435304
0.673175	0.408814	0.606365
0.667114	0.394528	0.689056
0.754625	0.354608	0.370286
0.643298	0.371733	0.651489
0.673081	0.635086	0.415866
0.559502	0.618008	0.5
0.674877	0.621403	0.405612
0.550403	0.359801	0.439921
0.675023	0.5	0.454412
0.750005	0.745495	0.359481
0.680854	0.539918	0.373692
0.675133	0.51733	0.505796
0.719056	0.376416	0.682102
0.66391	0.372959	0.28631
0.667426	0.485992	0.778648
0.592287	0.384109	0.5
0.736904	0.602635	0.543329
0.352061	0.442606	0.626711
0.756584	0.514157	0.384092
0.451248	0.46739	0.5
0.687662	0.413971	0.73013
0.582883	0.716381	0.373399
0.493195	0.454433	0.36575
0.529712	0.633343	0.420633
0.547979	0.594407	0.492188
0.600914	0.621781	0.659477
0.6659	0.669955	0.529261
0.494588	0.437908	0.397287
0.555058	0.538601	0.700856
0.355965	0.574943	0.797896
0.279361	0.571053	0.392836
0.30635	0.59004	0.705667
0.450804	0.327965	0.614504
0.599128	0.55507	0.474203
0.498244	0.694591	0.553656
0.672481	0.753523	0.375847
0.709039	0.339393	0.537568
0.728537	0.610926	0.459887
0.74006	0.705892	0.652328
0.566065	0.613645	0.69903
0.584276	0.479668	0.682145
0.46002	0.514416	0.391896
0.665064	0.72027	0.5
0.480456	0.480886	0.602189
0.396221	0.407887	0.444707
0.658234	0.49088	0.72874
0.51769	0.371172	0.691229
0.669455	0.598375	0.729575
0.734241	0.476085	0.74105
0.617557	0.399228	0.44322
0.600685	0.529912	0.72061
0.738336	0.691357	0.578956
0.731117	0.665996	0.377487
0.364284	0.651908	0.425073
0.572558	0.681802	0.470131
0.669156	0.372407	0.500694
0.754458	0.421616	0.4186
0.827724	0.492006	0.548872
0.76642	0.513251	0.650884
0.761416	0.699658	0.581401
0.560507	0.37758	0.453995
0.663909	0.46698	0.456522
0.681979	0.728742	0.355947
0.576039	0.431276	0.538527
0.50929	0.413879	0.394791
0.738379	0.421389	0.592275
0.474882	0.640315	0.469272
0.674176	0.444002	0.43881
0.764563	0.665805	0.5
0.801992	0.353017	0.364594
0.657116	0.515849	0.372239
0.789954	0.445491	0.420776
0.470751	0.703078	0.777895
0.704304	0.354177	0.69695
0.677397	0.465233	0.538354
0.622481	0.586039	0.756563
0.662186	0.476534	0.5
0.680914	0.379787	0.377578
0.608784	0.43318	0.667141
0.788079	0.5	0.42387
0.721825	0.611973	0.762525
0.449995	0.58845	0.64085
0.633857	0.640391	0.413301
0.61868	0.375355	0.383859
0.518742	0.627347	0.794437
0.724153	0.367298	0.534674
0.562846	0.481857	0.405797
0.781507	0.723263	0.535582
0.6411	0.300349	0.778555
0.719898	0.369755	0.5
0.565048	0.607441	0.374818
0.514578	0.640272	0.760034
0.763696	0.399629	0.561768
0.747873	0.560568	0.262902
0.617641	0.504868	0.539861
0.570841	0.671117	0.579049
0.607177	0.519413	0.5
0.686568	0.602863	0.468819
0.687172	0.541344	0.396554
0.740264	0.694818	0.503168
0.750501	0.555452	0.383415
0.737041	0.646543	0.447021
0.612561	0.400477	0.634043
0.505817	0.418159	0.399455
0.700379	0.41671	0.67086
0.68549	0.524227	0.323746
0.614888	0.630491	0.672833
0.695626	0.491137	0.649965
0.682833	0.625079	0.745309
0.467191	0.405131	0.562306
0.595739	0.389407	0.603107
0.606268	0.613154	0.419695
0.826013	0.387103	0.375363
0.752776	0.504801	0.401016
0.753922	0.680762	0.76529
0.758921	0.401436	0.722378
0.642465	0.454825	0.5
0.573804	0.652473	0.388
0.589894	0.627049	0.662275
0.633573	0.342584	0.743868
0.588942	0.731366	0.665759
0.379095	0.49156	0.404143
0.754698	0.244262	0.435336
0.582804	0.385011	0.322021
0.658677	0.592454	0.361762
0.68642	0.480681	0.381814
0.770434	0.394477	0.504513
0.827266	0.430146	0.347306
0.514855	0.564781	0.436397
0.654143	0.347123	0.409925
0.594718	0.456967	0.570747
0.706201	0.464604	0.450353
0.708152	0.520524	0.450353
0.594178	0.443966	0.469465
0.610496	0.700519	0.5
0.463314	0.369583	0.72195
0.646855	0.56331	0.487734
0.783635	0.48341	0.545586
0.762019	0.335984	0.480113
0.573421	0.336429	0.672579
0.557943	0.439711	0.64018
0.483527	0.323185	0.446004
0.700712	0.442061	0.628232
0.793954	0.561523	0.655048
0.777203	0.663287	0.737936
0.617313	0.325643	0.361679
0.720306	0.331549	0.458685
0.671275	0.386078	0.5
0.588091	0.668763	0.380459
0.714292	0.652732	0.680107
0.744265	0.368905	0.70682
0.599409	0.590854	0.773374
0.717198	0.361173	0.423369
0.649348	0.589519	0.406666
0.629439	0.441479	0.536306
0.581152	0.458752	0.284934
0.640557	0.381126	0.348623
0.663254	0.479803	0.680609
0.6748	0.360622	0.476961
0.766484	0.490097	0.422884
0.709053	0.432681	0.5
0.814714	0.689126	0.591252
0.645771	0.56076	0.494961
0.628664	0.419439	0.377198
0.51768	0.467254	0.5
0.687425	0.273616	0.421561
0.731411	0.378891	0.320404
0.570423	0.355017	0.374177
0.755401	0.3886	0.448131
0.655912	0.394166	0.655488
0.671245	0.412483	0.607453
0.681068	0.428945	0.42305
0.588938	0.609995	0.599455
0.654915	0.578172	0.588187
0.535623	0.419092	0.738207
0.828233	0.364468	0.658937
0.545684	0.646108	0.81569
0.62831	0.370382	0.32642
0.690119	0.57493	0.606408
0.795409	0.279633	0.666166
0.590323	0.465137	0.637277
0.798853	0.62629	0.512926
0.616151	0.362395	0.669228
0.68211	0.654256	0.391099
0.616737	0.440599	0.402916
0.715597	0.265369	0.572987
0.763243	0.487643	0.562207
0.709255	0.443631	0.75615
0.744834	0.424125	0.54933
0.696606	0.254789	0.610494
0.676599	0.467254	0.549034
0.5749	0.290104	0.579204
0.736775	0.392575	0.688634
0.779467	0.436737	0.635688
0.556432	0.422482	0.62956
0.742736	0.296653	0.57552
0.711941	0.355987	0.651555
0.586166	0.409207	0.467148
0.833511	0.347585	0.361553
0.793207	0.416484	0.524438
0.503486	0.370887	0.601306
0.791894	0.372395	0.448489
0.543963	0.373007	0.416826
0.544898	0.360461	0.42515
0.651191	0.404102	0.451796
0.552053	0.370138	0.270679
0.733502	0.336759	0.327735
0.591636	0.443389	0.71984
0.69537	0.561582	0.414915
0.826939	0.449018	0.412861
0.726142	0.215085	0.38349
0.359415	0.303439	0.404564
0.7675	0.209865	0.57076
0.66283	0.281678	0.66111
0.766829	0.19768	0.56153
0.644872	0.542719	0.46405
0.729794	0.326357	0.60237
0.815984	0.423853	0.685511
0.570175	0.203265	0.554032
0.770867	0.494027	0.744389
0.513956	0.237676	0.5
0.636125	0.413168	0.420335
0.762733	0.453995	0.38711
0.72287	0.22157	0.581082
0.762853	0.404407	0.457206
0.709269	0.257596	0.61612
0.80258	0.285524	0.508868
0.787601	0.54369	0.437732
0.472304	0.561346	0.679167
0.72015	0.427731	0.511434
0.609038	0.318848	0.3254
0.743962	0.457101	0.495276
0.387178	0.481997	0.493323
0.737569	0.459551	0.454159
0.572025	0.440838	0.491451
0.488017	0.592208	0.725787
0.793206	0.618641	0.553777
0.746466	0.366579	0.435179
0.611182	0.595626	0.401784
0.605659	0.747501	0.463846
0.668193	0.34071	0.684808
0.744392	0.444347	0.429221
0.807907	0.272319	0.57574
0.791986	0.332074	0.585896
0.840985	0.601782	0.493818
0.561475	0.32573	0.569009
0.822175	0.421994	0.475537
0.580441	0.380628	0.660694
0.778001	0.374371	0.530442
0.532567	0.63114	0.734501
0.811685	0.806233	0.64926
0.771447	0.429775	0.5
0.771045	0.32985	0.7946
0.637303	0.375822	0.445127
0.720109	0.384956	0.424787
0.522601	0.308385	0.426331
0.61159	0.5799	0.66562
0.711662	0.595966	0.430064
0.800794	0.384854	0.394919
0.745511	0.419386	0.522534
0.723165	0.312169	0.664629
0.660466	0.384476	0.635762
0.753959	0.306228	0.505403
0.625429	0.601291	0.499971
0.51585	0.44675	0.455504
0.777263	0.59897	0.762616
0.768628	0.364066	0.636213
0.632442	0.743847	0.423121
0.780478	0.691766	0.711911
0.540201	0.374282	0.569181
0.7745	0.635754	0.325336
0.717662	0.609423	0.44065
0.636291	0.498644	0.37066
0.728682	0.359077	0.561736
0.697113	0.408393	0.486728
0.740485	0.427132	0.658339
0.563805	0.390657	0.67319
0.763472	0.589892	0.483155
0.663252	0.448084	0.488223
0.517317	0.378632	0.709322
0.679267	0.394148	0.566403
0.654026	0.387492	0.68424
0.674294	0.481917	0.630323
0.623593	0.594836	0.559002
0.524815	0.378323	0.44343
0.467714	0.477636	0.599644
0.458733	0.67716	0.561181
0.812449	0.413003	0.645582
0.581915	0.37714	0.596006
0.793019	0.372745	0.5
0.663066	0.658675	0.628408
0.641144	0.358037	0.607253
0.685832	0.617974	0.410614
0.723233	0.692621	0.746503
0.731885	0.359987	0.548158
0.719893	0.461578	0.5
0.620217	0.363931	0.309937
0.64427	0.792362	0.552142
0.715864	0.402959	0.611408
0.701217	0.334407	0.690936
0.695914	0.466366	0.47154
0.647366	0.782998	0.477523
0.761198	0.625453	0.429078
0.649475	0.374737	0.601518
0.837921	0.34666	0.612273
0.630666	0.536444	0.53115
0.456483	0.37693	0.522676
0.747681	0.394475	0.546349
0.68822	0.555892	0.537393
0.727842	0.297525	0.37477
0.662542	0.321386	0.371343
0.715644	0.644139	0.440944
0.799437	0.542103	0.681337
0.701327	0.546462	0.600484
0.754979	0.348537	0.337501
0.712311	0.412388	0.432124
0.785902	0.743292	0.593103
0.767508	0.335123	0.545763
0.637951	0.303824	0.652859
0.735475	0.399591	0.652863
0.777911	0.827553	0.39623
0.738633	0.419484	0.48247
0.699206	0.422734	0.707048
0.46556	0.616205	0.477648
0.68835	0.551373	0.628167
0.831422	0.276191	0.650935
0.578876	0.735046	0.577718
0.626639	0.482917	0.412491
0.649193	0.469351	0.41749
0.588059	0.55605	0.795191
0.586594	0.374978	0.441074
0.734624	0.336851	0.687236
0.634083	0.395898	0.564175
0.793205	0.563717	0.511509
0.79809	0.352331	0.642648
0.790584	0.395716	0.532826
0.709326	0.30705	0.675618
0.587221	0.669013	0.595438
0.791401	0.517906	0.656826
0.721677	0.319847	0.370961
0.674506	0.548502	0.647404
0.741577	0.384826	0.596739
0.646907	0.394761	0.445073
0.570287	0.45659	0.651689
0.661373	0.431919	0.440953
0.658056	0.722348	0.506793
0.774951	0.719669	0.448722
0.701737	0.272466	0.661217
0.744884	0.516212	0.485727
0.724087	0.483534	0.431497
0.697168	0.358165	0.625279
0.555329	0.658886	0.537384
0.475632	0.425133	0.487388
0.507258	0.339629	0.645579
0.399584	0.454048	0.661625
0.693541	0.456172	0.764621
0.611294	0.461359	0.73058
0.633735	0.741597	0.400521
0.780834	0.69485	0.704532
0.827889	0.645238	0.521541
0.6673	0.33495	0.513348
0.71449	0.538745	0.414538
0.689177	0.676612	0.717078
0.688306	0.449456	0.682051
0.499184	0.53851	0.636135
0.477913	0.577622	0.502941
0.518536	0.71912	0.399137
0.662393	0.683338	0.710329
0.660187	0.580757	0.621649
0.536696	0.657118	0.363442
0.391735	0.776938	0.5
0.317834	0.348003	0.430244
0.620138	0.592085	0.582506
0.534975	0.453577	0.681877
0.412434	0.432598	0.413869
0.682711	0.416747	0.685421
0.475488	0.381903	0.715145
0.614407	0.356206	0.708415
0.351121	0.562019	0.464604
0.498747	0.579208	0.696998
0.273305	0.366791	0.329503
0.745291	0.675723	0.439849
0.629984	0.388512	0.525215
0.477256	0.639794	0.66037
0.793843	0.61299	0.5
0.765248	0.406253	0.33733
0.865549	0.455655	0.725136
0.829978	0.492278	0.680833
0.561565	0.592711	0.400396
0.489446	0.532662	0.463287
0.73526	0.655485	0.547832
0.571272	0.762213	0.398755
0.517511	0.427259	0.649601
0.574614	0.561223	0.70002
0.589338	0.649929	0.290587
0.710539	0.456073	0.362743
0.45547	0.442304	0.599882
0.699588	0.747711	0.67867
0.421799	0.545107	0.323711
0.810722	0.677008	0.413748
0.705895	0.617082	0.637363
0.721747	0.628321	0.458086
0.550583	0.745014	0.621904
0.521158	0.529195	0.486556
0.440114	0.455891	0.49809
0.780202	0.383298	0.73917
0.540368	0.77625	0.546849
0.776536	0.622142	0.525572
0.433638	0.674941	0.55981
0.828331	0.71931	0.399297
0.742721	0.797508	0.423814
0.681476	0.643773	0.294575
0.751195	0.665238	0.658748
0.800327	0.654305	0.671547
0.608499	0.38067	0.650147
0.673528	0.427812	0.316521
0.713325	0.342894	0.461147
0.611672	0.449123	0.696645
0.695845	0.359213	0.496731
0.412695	0.623114	0.696683
0.632441	0.442429	0.360611
0.423072	0.700827	0.647379
0.668347	0.406654	0.539493
0.718917	0.675219	0.553027
0.695642	0.470165	0.520643
0.57372	0.631432	0.688441
0.71755	0.439028	0.5
0.692549	0.695766	0.406954
0.721808	0.45581	0.5
0.716852	0.725599	0.334761
0.754426	0.623326	0.459443
0.741734	0.605548	0.542473
0.486664	0.611499	0.678474
0.627331	0.700898	0.5
0.536796	0.703707	0.391632
0.663166	0.469243	0.485823
0.498842	0.368502	0.579751
0.629121	0.683391	0.689359
0.746646	0.695278	0.52035
0.640096	0.437735	0.514287
0.78486	0.384312	0.425363
0.454259	0.368445	0.443041
0.665277	0.617028	0.379254
0.818555	0.691472	0.457223
0.649779	0.446769	0.398298
0.612138	0.643495	0.576438
0.628403	0.668435	0.46688
0.654255	0.728199	0.700704
0.68795	0.595776	0.739633
0.566459	0.422954	0.556829
0.716067	0.612936	0.599525
0.746874	0.386631	0.361858
0.635589	0.739885	0.549596
0.800368	0.68831	0.383262
0.719221	0.51695	0.593396
0.637768	0.629181	0.680346
0.65483	0.403939	0.495315
0.713567	0.647162	0.420212
0.513792	0.413588	0.586264
0.729989	0.711141	0.50822
0.656666	0.604402	0.670731
0.722955	0.661905	0.686081
0.714267	0.518403	0.730234
0.638806	0.417067	0.625723
0.621612	0.689594	0.636942
0.76398	0.393906	0.5
0.786214	0.409207	0.365994
0.675855	0.595504	0.618937
0.796908	0.414673	0.651848
0.554962	0.444555	0.615434
0.721222	0.649551	0.526551
0.764949	0.495237	0.601531
0.659334	0.795224	0.335725
0.543261	0.448112	0.570655
0.741068	0.39966	0.57869
0.617759	0.603945	0.661606
0.590441	0.400876	0.37221
0.664305	0.546943	0.6778
0.796002	0.437541	0.696037
0.799433	0.581986	0.576793
0.546259	0.420564	0.516025
0.576825	0.787261	0.636411
0.540636	0.407064	0.637615
0.448543	0.303197	0.383152
0.671077	0.706793	0.647198
0.395975	0.704526	0.645779
0.795815	0.761726	0.681261
0.798509	0.73094	0.525976
0.659236	0.690759	0.734187
0.502371	0.48344	0.433111
0.837316	0.363466	0.703837
0.452256	0.419463	0.647978
0.621781	0.319042	0.663327
0.566509	0.383707	0.45563
0.593785	0.773243	0.732913
0.657544	0.669954	0.440174
0.511994	0.787929	0.321088
0.752342	0.363631	0.386185
0.42596	0.358402	0.574671
0.820977	0.779772	0.353839
0.589928	0.576596	0.724179
0.701612	0.408014	0.366023
0.506672	0.377273	0.650646
0.460614	0.308387	0.507135
0.494524	0.437474	0.704895
0.500853	0.787376	0.595438
0.635735	0.700399	0.44011
0.502524	0.327857	0.436847
0.711618	0.698411	0.515037
0.570036	0.392214	0.51951
0.774278	0.38812	0.592527
0.712179	0.424882	0.679505
0.727345	0.609387	0.61939
0.638329	0.718526	0.463965
0.696354	0.601103	0.477584
0.790141	0.413745	0.623025
0.750782	0.353128	0.661507
0.676594	0.46018	0.401563
0.815701	0.744648	0.5
0.49682	0.478377	0.541012
0.618729	0.688974	0.456107
0.818274	0.481855	0.240308
0.733218	0.416009	0.503108
0.791905	0.710144	0.562087
0.782106	0.463191	0.373509
0.685603	0.811882	0.610982
0.428379	0.395021	0.414307
0.692409	0.365425	0.735155
0.391869	0.724684	0.362464
0.379826	0.38652	0.763601
0.516279	0.382561	0.501508
0.637503	0.615366	0.649947
0.7585	0.371962	0.687095
0.406633	0.753783	0.48012
0.482028	0.397075	0.586422
0.776147	0.708085	0.63399
0.652727	0.744602	0.424824
0.392182	0.400127	0.652808
0.716503	0.544333	0.474707
0.474932	0.375951	0.669343
0.725959	0.360817	0.62691
0.78672	0.265685	0.394848
0.548049	0.397175	0.630843
0.762129	0.435709	0.362514
0.763085	0.779945	0.329406
0.698966	0.717803	0.747022
0.639261	0.611986	0.60633
0.734367	0.421913	0.429123
0.741981	0.433998	0.717779
0.661231	0.368579	0.75329
0.640722	0.638161	0.485979
0.804452	0.779038	0.402482
0.470809	0.398568	0.526242
0.572569	0.44943	0.736898
0.65762	0.422109	0.447632
0.630909	0.334184	0.639498
0.501363	0.794034	0.439433
0.554905	0.418284	0.585889
0.426285	0.403588	0.414897
0.838091	0.450025	0.572372
0.796059	0.814172	0.418038
0.785098	0.719559	0.682724
0.767278	0.760504	0.647287
0.739588	0.37202	0.726771
0.450363	0.671515	0.703961
0.732013	0.348962	0.503279
0.646153	0.703149	0.35782
0.804544	0.691697	0.453871
0.552108	0.650386	0.750011
0.777037	0.505088	0.423002
0.760936	0.721104	0.491698
0.568496	0.410044	0.385425
0.660361	0.350908	0.501712
0.654556	0.383529	0.479834
0.608183	0.39376	0.385402
0.817562	0.605395	0.705362
0.718159	0.383421	0.447287
0.738988	0.425893	0.441075
0.588356	0.346215	0.664904
0.480583	0.668519	0.684447
0.674091	0.418975	0.446771
0.647547	0.3307	0.608473
0.829232	0.45168	0.52937
0.79156	0.740661	0.690334
0.679881	0.809564	0.473914
0.449161	0.412234	0.638538
0.646543	0.691988	0.493261
0.677283	0.769828	0.699883
0.550488	0.353736	0.690945
0.780842	0.68453	0.724538
0.734338	0.710426	0.528571
0.63889	0.554868	0.674754
0.726224	0.540023	0.73371
0.545393	0.380223	0.5
0.534503	0.754476	0.38434
0.627453	0.349066	0.742084
0.604101	0.389664	0.647429
0.566023	0.518901	0.53551
0.692417	0.720799	0.5
0.630129	0.391152	0.5
0.540001	0.354785	0.42141
0.792663	0.444394	0.438881
0.614907	0.362642	0.427728
0.497307	0.385787	0.404917
0.71867	0.755324	0.653646
0.762869	0.733518	0.649873
0.556087	0.40195	0.529674
0.740555	0.695351	0.669627
0.715344	0.563107	0.35514
0.614736	0.531588	0.775287
0.771929	0.41916	0.674718
0.784992	0.370235	0.775345
0.711146	0.396281	0.532387
0.601077	0.390143	0.480113
0.692008	0.703923	0.69483
0.487737	0.404119	0.444192
0.535201	0.761212	0.618782
0.70246	0.638941	0.658991
0.715769	0.61987	0.536854
0.630173	0.488043	0.39323
0.721869	0.397568	0.325687
0.691688	0.374137	0.474701
0.630409	0.755412	0.71628
0.704408	0.643227	0.607496
0.790463	0.629401	0.411639
0.624216	0.721708	0.71034
0.760745	0.512639	0.651895
0.752335	0.728187	0.676339
0.647837	0.55547	0.63899
0.737789	0.567348	0.49107
0.462469	0.393811	0.38805
0.444308	0.525178	0.531909
0.517167	0.273833	0.667181
0.684583	0.703132	0.690537
0.80953	0.621538	0.713627
0.73982	0.779812	0.458313
0.635924	0.730269	0.700758
0.730557	0.698918	0.659273
0.634259	0.750895	0.55289
0.759896	0.811986	0.539794
0.647706	0.439059	0.738703
0.571094	0.68949	0.699787
0.592919	0.319793	0.613828
0.698615	0.616144	0.608481
0.752909	0.648079	0.530446
0.764223	0.675017	0.459995
0.7452	0.43375	0.60449
0.627344	0.561642	0.658923
0.436835	0.757861	0.667852
0.756185	0.710423	0.702842
0.790731	0.388418	0.675338
0.658851	0.737957	0.654963
0.70964	0.47266	0.631864
0.640324	0.691204	0.600044
0.726674	0.375713	0.597549
0.53238	0.696077	0.709019
0.707102	0.399264	0.706107
0.600153	0.779877	0.536796
0.780789	0.366343	0.64748
0.784812	0.752666	0.444845
0.552535	0.725358	0.675017
0.649892	0.645394	0.658514
0.683669	0.598556	0.483355
0.600079	0.731384	0.5
0.709725	0.518578	0.673455
0.761145	0.4049	0.59249
0.647771	0.571454	0.622372
0.652001	0.738377	0.618609
0.557851	0.683454	0.671776
0.612471	0.457598	0.594028
0.708424	0.736303	0.629071
0.702528	0.614904	0.689445
0.648667	0.390193	0.754786
0.459173	0.494229	0.665815
0.618223	0.429823	0.614496
0.693269	0.671817	0.734336
0.584414	0.686033	0.748028
0.603256	0.777721	0.678821
0.772233	0.639378	0.571206
0.454147	0.45538	0.682685
0.628369	0.679372	0.434841
0.506433	0.452872	0.674858
0.444289	0.397074	0.68253
0.416684	0.451658	0.618068
0.412158	0.376275	0.46556
0.515846	0.429916	0.535736
0.56638	0.703374	0.633744
0.421775	0.635166	0.809543
0.26771	0.439711	0.552429
0.732576	0.507851	0.610491
0.715526	0.689886	0.515376
0.744395	0.46156	0.671068
0.700559	0.607307	0.671122
0.718098	0.62464	0.66428
0.662381	0.364244	0.627726
0.60496	0.392769	0.374561
0.582728	0.486802	0.422377
0.601336	0.759329	0.557841
0.486392	0.418875	0.414642
0.541751	0.652057	0.606486
0.651864	0.706671	0.498765
0.66792	0.599612	0.789214
0.796911	0.68468	0.595126
0.757865	0.441905	0.5
0.74019	0.599498	0.715922
0.72799	0.642553	0.568947
0.659669	0.462894	0.453458
0.578543	0.386678	0.534201
0.707707	0.580626	0.775119
0.554761	0.714699	0.484255
0.657291	0.409936	0.690999
0.748317	0.431442	0.588594
0.670618	0.342872	0.563843
0.756444	0.593668	0.391849
0.426377	0.731395	0.358188
0.50341	0.470959	0.723438
0.802307	0.652924	0.353106
0.753845	0.458231	0.770174
0.759131	0.421171	0.612661
0.622937	0.730122	0.734273
0.740843	0.693292	0.395221
0.749542	0.669435	0.719657
0.649733	0.7794	0.666914
0.597009	0.77635	0.634368
0.827109	0.352764	0.515781
0.645483	0.410059	0.660431
0.681493	0.768877	0.606981
0.702125	0.771216	0.483608
0.770679	0.485632	0.457864
0.795914	0.286425	0.463616
0.632792	0.625279	0.673009
0.663828	0.3167	0.610626
0.709112	0.551576	0.588252
0.5256	0.531571	0.502877
0.73515	0.399294	0.458399
0.523153	0.484727	0.562079
0.745778	0.650034	0.502322
0.763619	0.62322	0.584352
0.732981	0.65541	0.514561
0.654409	0.644907	0.591445
0.82936	0.494918	0.558865
0.739829	0.681287	0.658385
0.756749	0.404656	0.638789
0.687476	0.387993	0.690165
0.606002	0.678347	0.661113
0.605952	0.617522	0.657236
0.497366	0.711421	0.64409
0.654407	0.331763	0.428596
0.672817	0.526147	0.347328
0.601331	0.757264	0.742352
0.61628	0.528728	0.460452
0.742141	0.731548	0.683272
0.711691	0.523171	0.619774
0.680722	0.630981	0.685193
0.736111	0.693927	0.5
0.768884	0.336782	0.451938
0.723259	0.33041	0.647648
0.543338	0.751858	0.751802
0.723589	0.333942	0.481855
0.719023	0.629932	0.5
0.557075	0.369802	0.369648
0.792959	0.784199	0.61314
0.667882	0.391511	0.705526
0.81515	0.370418	0.343599
0.725159	0.511404	0.617337
0.763732	0.552924	0.380222
0.7808	0.487899	0.633114
0.711995	0.408488	0.514088
0.613374	0.383138	0.763265
0.742809	0.74789	0.685401
0.646737	0.733623	0.357489
0.71848	0.334217	0.753141
0.731936	0.373323	0.661373
0.537779	0.643123	0.691783
0.683403	0.717613	0.533258
0.605989	0.744367	0.336075
0.640267	0.248485	0.663894
0.689785	0.323062	0.553342
0.618431	0.739035	0.5
0.775613	0.461176	0.354831
0.562713	0.67748	0.68791
0.656525	0.375505	0.36214
0.774359	0.323719	0.434949
0.620189	0.39188	0.5
0.72358	0.40756	0.379367
0.651342	0.640168	0.536321
0.728682	0.566704	0.462694
0.630463	0.535361	0.490497
0.67769	0.719033	0.64522
0.431561	0.660424	0.444914
0.766986	0.340775	0.776141
0.557235	0.634251	0.689845
0.725658	0.367375	0.671455
0.622827	0.516497	0.542307
0.433023	0.618564	0.612039
0.689763	0.453919	0.589773
0.732818	0.350174	0.439295
0.479357	0.5714	0.41506
0.447682	0.716011	0.665919
0.693849	0.441971	0.354757
0.683094	0.471227	0.706126
0.497992	0.449534	0.402793
0.479783	0.638752	0.5
0.54819	0.412474	0.71367
[truncated: 5,299 more rows]
