# Supplementary material for: Inducible and reversible phenotypes in a novel mouse model of Friedreich’s Ataxia
Source: eLife. 2017 Dec 19;6:e30054. doi: 10.7554/eLife.30054 (PMC5736353; doi:10.7554/eLife.30054)
Supplement: Figure 7—source data 1. [file elife-30054-fig7-data1.xlsx]

## Sheet: Figure 7b
Weeks	Heart (Up)	Cerebellum (Up)	DRGs (Up)
WK0	0	5	0
WK3	52	4	5
WK12	784	27	13
WK16	1597	42	32
WK20	299	54	56
WK4R	224	11	5
WK8R	0	0	0
Weeks	Heart (Down)	Cerebellum (Down)	DRGs (Down)
WK0	0	0	0
WK3	199	5	4
WK12	742	79	34
WK16	1518	89	54
WK20	442	46	20
WK4R	346	36	7
WK8R	2	0	0

## Sheet: Figure 7c
Samples	subclassName	PCSums
1_WK0	01_Chemotaxis	17.2246
1_WK0	01_Chemotaxis	10.9671
1_WK0	01_Chemotaxis	14.1714
1_WK0	01_Chemotaxis	4.00508
2_WK3	01_Chemotaxis	49.8629
2_WK3	01_Chemotaxis	56.8234
2_WK3	01_Chemotaxis	52.0551
2_WK3	01_Chemotaxis	67.6297
3_WK12	01_Chemotaxis	69.9888
3_WK12	01_Chemotaxis	100
3_WK12	01_Chemotaxis	77.1886
3_WK12	01_Chemotaxis	74.7811
4_WK16	01_Chemotaxis	90.3113
4_WK16	01_Chemotaxis	81.0742
4_WK16	01_Chemotaxis	92.3903
4_WK16	01_Chemotaxis	72.3597
5_WK20	01_Chemotaxis	76.8005
5_WK20	01_Chemotaxis	63.0585
5_WK20	01_Chemotaxis	25.7044
5_WK20	01_Chemotaxis	40.9525
6_WK4R	01_Chemotaxis	38.2307
6_WK4R	01_Chemotaxis	49.0478
6_WK4R	01_Chemotaxis	71.2968
6_WK4R	01_Chemotaxis	89.3405
7_WK8R	01_Chemotaxis	26.5636
7_WK8R	01_Chemotaxis	54.721
7_WK8R	01_Chemotaxis	29.7256
7_WK8R	01_Chemotaxis	62.9713
1_WK0	02_Immune response	9.48784
1_WK0	02_Immune response	16.7161
1_WK0	02_Immune response	2.71947
1_WK0	02_Immune response	2.8509
2_WK3	02_Immune response	25.8149
2_WK3	02_Immune response	40.6545
2_WK3	02_Immune response	27.0361
2_WK3	02_Immune response	41.1458
3_WK12	02_Immune response	41.9597
3_WK12	02_Immune response	63.7071
3_WK12	02_Immune response	57.9988
3_WK12	02_Immune response	39.9954
4_WK16	02_Immune response	56.6137
4_WK16	02_Immune response	55.9902
4_WK16	02_Immune response	64.7013
4_WK16	02_Immune response	49.5087
5_WK20	02_Immune response	61.2581
5_WK20	02_Immune response	48.0952
5_WK20	02_Immune response	27.4384
5_WK20	02_Immune response	36.5557
6_WK4R	02_Immune response	31.7463
6_WK4R	02_Immune response	27.2722
6_WK4R	02_Immune response	44.3998
6_WK4R	02_Immune response	54.9641
7_WK8R	02_Immune response	30.6889
7_WK8R	02_Immune response	20.8684
7_WK8R	02_Immune response	4.11496
7_WK8R	02_Immune response	46.411
1_WK0	03_Lysosome and phagocytosis	16.4476
1_WK0	03_Lysosome and phagocytosis	19.3142
1_WK0	03_Lysosome and phagocytosis	9.24621
1_WK0	03_Lysosome and phagocytosis	1.95734
2_WK3	03_Lysosome and phagocytosis	29.8458
2_WK3	03_Lysosome and phagocytosis	40.9927
2_WK3	03_Lysosome and phagocytosis	31.7327
2_WK3	03_Lysosome and phagocytosis	50.7915
3_WK12	03_Lysosome and phagocytosis	36.6413
3_WK12	03_Lysosome and phagocytosis	73.4652
3_WK12	03_Lysosome and phagocytosis	60.9161
3_WK12	03_Lysosome and phagocytosis	39.4132
4_WK16	03_Lysosome and phagocytosis	68.0435
4_WK16	03_Lysosome and phagocytosis	60.042
4_WK16	03_Lysosome and phagocytosis	70.821
4_WK16	03_Lysosome and phagocytosis	53.2663
5_WK20	03_Lysosome and phagocytosis	90.3719
5_WK20	03_Lysosome and phagocytosis	55.6066
5_WK20	03_Lysosome and phagocytosis	23.0096
5_WK20	03_Lysosome and phagocytosis	46.719
6_WK4R	03_Lysosome and phagocytosis	27.6537
6_WK4R	03_Lysosome and phagocytosis	21.2726
6_WK4R	03_Lysosome and phagocytosis	28.6123
6_WK4R	03_Lysosome and phagocytosis	54.6218
7_WK8R	03_Lysosome and phagocytosis	13.8781
7_WK8R	03_Lysosome and phagocytosis	10.2497
7_WK8R	03_Lysosome and phagocytosis	8.00917
7_WK8R	03_Lysosome and phagocytosis	34.024
1_WK0	04_Membrane organization	9.67539
1_WK0	04_Membrane organization	10.4494
1_WK0	04_Membrane organization	12.3215
1_WK0	04_Membrane organization	3.01586
2_WK3	04_Membrane organization	22.8264
2_WK3	04_Membrane organization	30.5837
2_WK3	04_Membrane organization	24.899
2_WK3	04_Membrane organization	34.2068
3_WK12	04_Membrane organization	33.6639
3_WK12	04_Membrane organization	43.0507
3_WK12	04_Membrane organization	37.9951
3_WK12	04_Membrane organization	32.8141
4_WK16	04_Membrane organization	40.5796
4_WK16	04_Membrane organization	43.6065
4_WK16	04_Membrane organization	44.6001
4_WK16	04_Membrane organization	39.0879
5_WK20	04_Membrane organization	42.2459
5_WK20	04_Membrane organization	35.8511
5_WK20	04_Membrane organization	17.3778
5_WK20	04_Membrane organization	36.4985
6_WK4R	04_Membrane organization	27.875
6_WK4R	04_Membrane organization	19.6985
6_WK4R	04_Membrane organization	33.983
6_WK4R	04_Membrane organization	40.2827
7_WK8R	04_Membrane organization	25.8996
7_WK8R	04_Membrane organization	4.69198
7_WK8R	04_Membrane organization	4.01667
7_WK8R	04_Membrane organization	34.1283
1_WK0	05_Vesicle transport and endocytosis	4.32517
1_WK0	05_Vesicle transport and endocytosis	9.86175
1_WK0	05_Vesicle transport and endocytosis	3.9301
1_WK0	05_Vesicle transport and endocytosis	7.39673
2_WK3	05_Vesicle transport and endocytosis	26.2191
2_WK3	05_Vesicle transport and endocytosis	25.335
2_WK3	05_Vesicle transport and endocytosis	20.8299
2_WK3	05_Vesicle transport and endocytosis	32.8299
3_WK12	05_Vesicle transport and endocytosis	31.1477
3_WK12	05_Vesicle transport and endocytosis	39.0472
3_WK12	05_Vesicle transport and endocytosis	35.4748
3_WK12	05_Vesicle transport and endocytosis	24.6229
4_WK16	05_Vesicle transport and endocytosis	36.1616
4_WK16	05_Vesicle transport and endocytosis	36.4667
4_WK16	05_Vesicle transport and endocytosis	43.566
4_WK16	05_Vesicle transport and endocytosis	32.0955
5_WK20	05_Vesicle transport and endocytosis	37.5482
5_WK20	05_Vesicle transport and endocytosis	31.4274
5_WK20	05_Vesicle transport and endocytosis	19.1022
5_WK20	05_Vesicle transport and endocytosis	27.9025
6_WK4R	05_Vesicle transport and endocytosis	24.1829
6_WK4R	05_Vesicle transport and endocytosis	18.3363
6_WK4R	05_Vesicle transport and endocytosis	29.0891
6_WK4R	05_Vesicle transport and endocytosis	35.551
7_WK8R	05_Vesicle transport and endocytosis	20.5673
7_WK8R	05_Vesicle transport and endocytosis	2.90629
7_WK8R	05_Vesicle transport and endocytosis	4.69819
7_WK8R	05_Vesicle transport and endocytosis	26.6476
1_WK0	06_Proteasome	10.2436
1_WK0	06_Proteasome	5.46885
1_WK0	06_Proteasome	3.25548
1_WK0	06_Proteasome	14.6321
2_WK3	06_Proteasome	33.1843
2_WK3	06_Proteasome	31.3616
2_WK3	06_Proteasome	30.9261
2_WK3	06_Proteasome	34.5396
3_WK12	06_Proteasome	31.9848
3_WK12	06_Proteasome	40.4943
3_WK12	06_Proteasome	35.9308
3_WK12	06_Proteasome	32.036
4_WK16	06_Proteasome	34.8053
4_WK16	06_Proteasome	43.828
4_WK16	06_Proteasome	82.7744
4_WK16	06_Proteasome	40.9681
5_WK20	06_Proteasome	37.9226
5_WK20	06_Proteasome	35.2466
5_WK20	06_Proteasome	33.4083
5_WK20	06_Proteasome	33.7494
6_WK4R	06_Proteasome	28.6096
6_WK4R	06_Proteasome	29.2543
6_WK4R	06_Proteasome	27.6503
6_WK4R	06_Proteasome	42.9496
7_WK8R	06_Proteasome	25.4836
7_WK8R	06_Proteasome	21.223
7_WK8R	06_Proteasome	33.8756
7_WK8R	06_Proteasome	16.4309
1_WK0	07_DNA organization	19.3434
1_WK0	07_DNA organization	21.1567
1_WK0	07_DNA organization	17.7888
1_WK0	07_DNA organization	14.6344
2_WK3	07_DNA organization	19.2343
2_WK3	07_DNA organization	25.7217
2_WK3	07_DNA organization	21.2448
2_WK3	07_DNA organization	30.766
3_WK12	07_DNA organization	33.8444
3_WK12	07_DNA organization	42.6897
3_WK12	07_DNA organization	41.7264
3_WK12	07_DNA organization	36.4762
4_WK16	07_DNA organization	37.8732
4_WK16	07_DNA organization	38.017
4_WK16	07_DNA organization	40.8033
4_WK16	07_DNA organization	33.264
5_WK20	07_DNA organization	33.2518
5_WK20	07_DNA organization	32.4242
5_WK20	07_DNA organization	58.6386
5_WK20	07_DNA organization	39.3728
6_WK4R	07_DNA organization	30.0007
6_WK4R	07_DNA organization	32.8759
6_WK4R	07_DNA organization	31.6061
6_WK4R	07_DNA organization	31.1458
7_WK8R	07_DNA organization	29.8034
7_WK8R	07_DNA organization	51.6289
7_WK8R	07_DNA organization	48.3433
7_WK8R	07_DNA organization	31.2548
1_WK0	08_p53 signaling pathway	17.679
1_WK0	08_p53 signaling pathway	23.6384
1_WK0	08_p53 signaling pathway	30.0543
1_WK0	08_p53 signaling pathway	12.8228
2_WK3	08_p53 signaling pathway	26.5902
2_WK3	08_p53 signaling pathway	26.0686
2_WK3	08_p53 signaling pathway	25.1025
2_WK3	08_p53 signaling pathway	31.2916
3_WK12	08_p53 signaling pathway	29.782
3_WK12	08_p53 signaling pathway	39.3666
3_WK12	08_p53 signaling pathway	42.2225
3_WK12	08_p53 signaling pathway	24.0805
4_WK16	08_p53 signaling pathway	30.3478
4_WK16	08_p53 signaling pathway	33.5311
4_WK16	08_p53 signaling pathway	41.7576
4_WK16	08_p53 signaling pathway	31.9955
5_WK20	08_p53 signaling pathway	34.3002
5_WK20	08_p53 signaling pathway	31.702
5_WK20	08_p53 signaling pathway	30.0735
5_WK20	08_p53 signaling pathway	22.6887
6_WK4R	08_p53 signaling pathway	32.8071
6_WK4R	08_p53 signaling pathway	33.4726
6_WK4R	08_p53 signaling pathway	31.1502
6_WK4R	08_p53 signaling pathway	32.4663
7_WK8R	08_p53 signaling pathway	20.1506
7_WK8R	08_p53 signaling pathway	8.52968
7_WK8R	08_p53 signaling pathway	2.09999
7_WK8R	08_p53 signaling pathway	17.2204
1_WK0	09_Cell cycle and division	0.137272
1_WK0	09_Cell cycle and division	7.56649
1_WK0	09_Cell cycle and division	15.9411
1_WK0	09_Cell cycle and division	0.324405
2_WK3	09_Cell cycle and division	17.249
2_WK3	09_Cell cycle and division	22.8442
2_WK3	09_Cell cycle and division	16.636
2_WK3	09_Cell cycle and division	19.81
3_WK12	09_Cell cycle and division	20.2723
3_WK12	09_Cell cycle and division	35.9686
3_WK12	09_Cell cycle and division	41.814
3_WK12	09_Cell cycle and division	15.5949
4_WK16	09_Cell cycle and division	30.4537
4_WK16	09_Cell cycle and division	33.3143
4_WK16	09_Cell cycle and division	39.9911
4_WK16	09_Cell cycle and division	29.0869
5_WK20	09_Cell cycle and division	30.4434
5_WK20	09_Cell cycle and division	28.3749
5_WK20	09_Cell cycle and division	16.5917
5_WK20	09_Cell cycle and division	20.8274
6_WK4R	09_Cell cycle and division	26.8097
6_WK4R	09_Cell cycle and division	27.3829
6_WK4R	09_Cell cycle and division	27.5051
6_WK4R	09_Cell cycle and division	31.0851
7_WK8R	09_Cell cycle and division	9.49327
7_WK8R	09_Cell cycle and division	1.03776
7_WK8R	09_Cell cycle and division	0
7_WK8R	09_Cell cycle and division	16.6538
1_WK0	10_Protein transport and localization	0.128298
1_WK0	10_Protein transport and localization	4.35613
1_WK0	10_Protein transport and localization	7.39193
1_WK0	10_Protein transport and localization	4.84033
2_WK3	10_Protein transport and localization	14.6982
2_WK3	10_Protein transport and localization	21.3673
2_WK3	10_Protein transport and localization	20.7438
2_WK3	10_Protein transport and localization	26.9481
3_WK12	10_Protein transport and localization	26.7483
3_WK12	10_Protein transport and localization	34.2637
3_WK12	10_Protein transport and localization	35.3781
3_WK12	10_Protein transport and localization	24.1985
4_WK16	10_Protein transport and localization	29.9077
4_WK16	10_Protein transport and localization	33.6042
4_WK16	10_Protein transport and localization	36.9394
4_WK16	10_Protein transport and localization	28.5872
5_WK20	10_Protein transport and localization	29.3535
5_WK20	10_Protein transport and localization	28.6181
5_WK20	10_Protein transport and localization	21.9812
5_WK20	10_Protein transport and localization	26.3552
6_WK4R	10_Protein transport and localization	23.2936
6_WK4R	10_Protein transport and localization	19.2503
6_WK4R	10_Protein transport and localization	23.5492
6_WK4R	10_Protein transport and localization	30.5056
7_WK8R	10_Protein transport and localization	9.06113
7_WK8R	10_Protein transport and localization	10.9176
7_WK8R	10_Protein transport and localization	5.94461
7_WK8R	10_Protein transport and localization	22.3797
1_WK0	11_Control probes	3.04202
1_WK0	11_Control probes	1.41467
1_WK0	11_Control probes	6.00779
1_WK0	11_Control probes	0.169433
2_WK3	11_Control probes	6.69322
2_WK3	11_Control probes	5.56865
2_WK3	11_Control probes	6.91101
2_WK3	11_Control probes	6.94847
3_WK12	11_Control probes	2.71555
3_WK12	11_Control probes	8.44298
3_WK12	11_Control probes	10.9187
3_WK12	11_Control probes	14.2975
4_WK16	11_Control probes	15.1374
4_WK16	11_Control probes	18.7134
4_WK16	11_Control probes	14.5247
4_WK16	11_Control probes	16.9385
5_WK20	11_Control probes	11.1739
5_WK20	11_Control probes	10.0742
5_WK20	11_Control probes	15.3646
5_WK20	11_Control probes	7.42108
6_WK4R	11_Control probes	9.97007
6_WK4R	11_Control probes	15.7329
6_WK4R	11_Control probes	17.6327
6_WK4R	11_Control probes	8.66309
7_WK8R	11_Control probes	10.2787
7_WK8R	11_Control probes	13.8978
7_WK8R	11_Control probes	8.95687
7_WK8R	11_Control probes	3.63467
1_WK0	12_Nucleoside and nucleotide binding	0.506455
1_WK0	12_Nucleoside and nucleotide binding	6.08661
1_WK0	12_Nucleoside and nucleotide binding	8.56552
1_WK0	12_Nucleoside and nucleotide binding	0.554365
2_WK3	12_Nucleoside and nucleotide binding	16.7788
2_WK3	12_Nucleoside and nucleotide binding	26.6442
2_WK3	12_Nucleoside and nucleotide binding	24.6088
2_WK3	12_Nucleoside and nucleotide binding	26.1457
3_WK12	12_Nucleoside and nucleotide binding	23.5179
3_WK12	12_Nucleoside and nucleotide binding	31.7395
3_WK12	12_Nucleoside and nucleotide binding	30.9015
3_WK12	12_Nucleoside and nucleotide binding	21.5966
4_WK16	12_Nucleoside and nucleotide binding	30.0562
4_WK16	12_Nucleoside and nucleotide binding	30.8635
4_WK16	12_Nucleoside and nucleotide binding	32.8997
4_WK16	12_Nucleoside and nucleotide binding	30.995
5_WK20	12_Nucleoside and nucleotide binding	31.4871
5_WK20	12_Nucleoside and nucleotide binding	30.8241
5_WK20	12_Nucleoside and nucleotide binding	28.627
5_WK20	12_Nucleoside and nucleotide binding	29.3334
6_WK4R	12_Nucleoside and nucleotide binding	26.7286
6_WK4R	12_Nucleoside and nucleotide binding	26.8379
6_WK4R	12_Nucleoside and nucleotide binding	27.9693
6_WK4R	12_Nucleoside and nucleotide binding	32.1133
7_WK8R	12_Nucleoside and nucleotide binding	13.6153
7_WK8R	12_Nucleoside and nucleotide binding	4.76355
7_WK8R	12_Nucleoside and nucleotide binding	9.61769
7_WK8R	12_Nucleoside and nucleotide binding	21.7676
1_WK0	13_Mitochondrion	1.55089
1_WK0	13_Mitochondrion	14.7917
1_WK0	13_Mitochondrion	17.4987
1_WK0	13_Mitochondrion	0.585241
2_WK3	13_Mitochondrion	26.1046
2_WK3	13_Mitochondrion	29.0698
2_WK3	13_Mitochondrion	31.128
2_WK3	13_Mitochondrion	31.6421
3_WK12	13_Mitochondrion	29.0092
3_WK12	13_Mitochondrion	45.2496
3_WK12	13_Mitochondrion	42.548
3_WK12	13_Mitochondrion	30.5059
4_WK16	13_Mitochondrion	38.1895
4_WK16	13_Mitochondrion	39.6073
4_WK16	13_Mitochondrion	40.9281
4_WK16	13_Mitochondrion	37.6459
5_WK20	13_Mitochondrion	40.6874
5_WK20	13_Mitochondrion	39.6883
5_WK20	13_Mitochondrion	33.7747
5_WK20	13_Mitochondrion	38.4505
6_WK4R	13_Mitochondrion	30.9563
6_WK4R	13_Mitochondrion	28.7756
6_WK4R	13_Mitochondrion	31.5561
6_WK4R	13_Mitochondrion	37.9336
7_WK8R	13_Mitochondrion	25.0073
7_WK8R	13_Mitochondrion	25.1898
7_WK8R	13_Mitochondrion	24.9123
7_WK8R	13_Mitochondrion	26.0241
1_WK0	14_All functional groups	0.69163
1_WK0	14_All functional groups	7.54985
1_WK0	14_All functional groups	6.5183
1_WK0	14_All functional groups	0.593734
2_WK3	14_All functional groups	19.5578
2_WK3	14_All functional groups	25.8873
2_WK3	14_All functional groups	21.8643
2_WK3	14_All functional groups	25.3245
3_WK12	14_All functional groups	25.9655
3_WK12	14_All functional groups	32.2453
3_WK12	14_All functional groups	32.0941
3_WK12	14_All functional groups	24.0667
4_WK16	14_All functional groups	30.541
4_WK16	14_All functional groups	31.9285
4_WK16	14_All functional groups	33.5499
4_WK16	14_All functional groups	30.3425
5_WK20	14_All functional groups	31.4792
5_WK20	14_All functional groups	29.6159
5_WK20	14_All functional groups	25.3516
5_WK20	14_All functional groups	27.6983
6_WK4R	14_All functional groups	25.3052
6_WK4R	14_All functional groups	24.9412
6_WK4R	14_All functional groups	26.8749
6_WK4R	14_All functional groups	30.8352
7_WK8R	14_All functional groups	17.6891
7_WK8R	14_All functional groups	8.45888
7_WK8R	14_All functional groups	7.5391
7_WK8R	14_All functional groups	23.168
