# Supplementary material for: Inducible and reversible phenotypes in a novel mouse model of Friedreich’s Ataxia
Source: eLife. 2017 Dec 19;6:e30054. doi: 10.7554/eLife.30054 (PMC5736353; doi:10.7554/eLife.30054)
Supplement: Figure 8—source data 1. [file elife-30054-fig8-data1.xlsx]

## Sheet: Figure 8d
WT-DOX	TG-DOX	TG-DOX-RESCUE
30	50	49
38	48	59
31	5	76
56	22	4
16	19	70
14	26	38
8	97	44
15	9	33
6	10	8
4	24	29
3	12	73
4	46	48
18	11	14
15	45	74
8	9	134
7	8	2
7	23	14
6	39	18
2	11	1
4	14	43
6	60	5
30	15	2
5	45	6
5	16	10
3	18	2
23	51	16
5	7	22
6	10	14
51	9	3
2	33	3
12	13	31
6	5	16
12	4	16
24	107	4
26	48	4
2	36	8
2	17	19
1	57	4
4	10	16
9	4	20
9	27	1
5	71	11
12	25	32
9	29	1
12	31	328
2	54	121
9	4	6
8	4	15
14	28	55
1	157	19
1	8	68
3	31	9
6	107	4
10	16	3
16	18	22
2	38	14
4	34	2
12	13	2
1	10	6
19	4	11
8	37	17
13	7	61
	14	6
	15	20
	14	52
	9	4
	74	32
	18	13
	40	21
	16	30
	12	27
	10	4
	32	9
	12	34
	9	31
	19	14
	7	14
	6	10
	6	27
	64	9
	20	5
	20	7
	7	16
	4	4
	6	11
	5	8
	10	5
	40	2
	17	40
	52	45
	8	18
	22	13
	99	9
	9	30
	13	20
	14	4
	106	12
	7	22
	26	6
	11	8
	15	12
	28	33
	21	10
	19	20
	29	46
	22	9
	9	4
	16
	38
	28
	8
	4
	25
	53
	14
	18
	9
	24
	18
	6
	31
	27
	6
	12
	7
	52
	18
	4
	9
	71
	24
	19
	5
	12
	21
	26
	5
	15
	25
	7
	15
	12
	90
	13
	40
	55
	4
	20
	43
	8
	100
	19
	4
	8
	23
	104
	5
	102
	11
	22
	15
	77
	19
	75
	4
	14
	23
	20
	40
	8
	31
	12
	12
	5
	12
	6
	55
	12
	10
	11
	33
	27
	4
	17
	29
	20
	17
	12
	14
	25
	35
	58
	12
	8
	56
	35
	9
	4
	7
	4
	9
	5
	10
	14
	30
	23
	6
	13
	4
	27
	155
	6
	11
	9
	11
	31
	6
	46
	16
	17
	22
	43
	19
	52
	34
	39
	12
	25
	19
	7
	23
	22
	4
	29
	9
	4
	42
	8
	18
	16
	4
	4
	4
	14
	14
	4
	6
	4
	16
	7
	17
	10
	42
	38
	12
	5
	27
	24
	17
	12
	13
	14
	11
	16
	5
	34
	77
	7
	7
	4
	18
	92
	9
	7
	37
	11
	17
	14
	92
	80
	11
	52
	10
	28
	4
	9
	11
	86
	4
	16
	11
	6
	9
	7
	8
	42
	23
	20
	21
	35
	8
	5
	6
	7
	24
	16
	16
	21
	13
	6
	28
	4
	21
	49
	4
	13
	8
	18
	5
	62
	25
	8
	39
	15
	33
	31
	7
	5
	11
	7
	4
	4
	45
	25
	30
	20
	4
	12
	11
	10
	5
	53
	13
	5
	76
	14
	9
	10
	19
	28
	43
	18
	8
	7
	5
	84
	91
	6
	15
	84
	4
	5
	7
	15
	4
	6
	20
	23
	8
	6
	15
	27
	28
	16
	30
	19
	32
	21
	9
	57
	31
	44
	18
	4
	5
	9
	11
	31
	9
	21
	13
	7
	19
	13
	28
	77
	10
	52
	50
	11
	52
	16
	6
	63
	26
	5
	4
	7
	12
	26
	8
	67
	35
	32
	22
	4
	5
	4
	62
	19
	4
	8
	28
	4
	26
	5
	11
	48
	11
	34
	12
	20
	7
	16
	4
	7
	24
	37
	35
	7
	17
	18
	5
	89
	39
	9
	71
	5
	5
	12
	27
	22
	11
	18
	4
	7
	4
	33
	17
	18
	6
	21
	16
	17
	33
	6
	25
	35
	17
	35
	14
	4
	4
	10
	15
	14
	14
	8
	49
	8
	4
	9
	21
	27
	31
	32
	11
	79
	33
	22
	14
	11
	10
	23
	12
	84
	6
	76
	80
	4
	9
	35
	30
	17
	55
	17
	8
	6
	18
	4
	4
	4
	22
	5
	15
	9
	30
	6
	11
	10
	4
	11
	6
	12
	13
	39
	16
	7
	20
	48
	14
	5
	4
	14
	16
	20
	5
	17
	6
	6
	24
	18
	26
	4
	11
	6
	18
	7
	14
	14
	15
	14
	185
	6
	36
	5
	8
	10
	9
	97
	7
	4
